# Supplementary material for: A proteome-wide systems toxicological approach deciphers the interaction network of chemotherapeutic drugs in the cardiovascular milieu
Source: RSC Adv. 2018 Jun 4;8(36):20211–21. doi: 10.1039/c8ra02877j (PMC9080753; doi:10.1039/c8ra02877j)
Supplement: RA-008-C8RA02877J-s001 [file RA-008-C8RA02877J-s001.xlsx]

## Sheet: list 1 protein target list
Supplementary list 1: Drug-protein matrix for all individual metabolites along with each mother drug molecule obtained from Pharmmapper.
5-Fluorouracil									BLEOMYCIN				Busulphan				Camptothecin				CARBOPLATIN		CISPLATIN			Cyclophosphamide										cytarabine				Dasatinib								Daunorubicin
5-FU	FdUDP	FdUMP	FdUTP	FUDP	FUDR	FUMP	FUTP		BLEOMYCIN	DEAMIDO BLEOMYCIN	FERRIC BLEOMYCIN		3-hydroxy sulfolane	Busulphan	Methane sulphonic acid		9-Methoxycamptothecin	10-Hydroxycamptothecin	Camptothecin		CARBOPLATIN		cis-diamminedichloroplatinum-(II)	CISPLATIN		4-Glutathionyl cyclophosphamide-2D	4-hydroxy-cyclophosphamide	4-Ketocyclophosphamide	Aldophosphamide	Carboxy cyclophosphamide	Cyclophosphamide	dechloroethyl-cyclophosphamide	Iminocyclophosphamide	Phosphoramide Mustard		1-(beta)-D-arabinofuranosyluracil	Cytarabine 5′-triphosphate	cytarabine		Dasatinib alpha D Glucuronide	Dasatinib beta D Glucuronide	Dasatinib Carboxylic acid	Dasatinib N- oxide	Dasatinib	Hydroxy methyl Dasatinib	N- Deshydroxy ethyl Dasatinib		7-Deoxydaunorubicinol agylycone	7-Deoxydaunorubicinone
Deoxyuridine 5-triphosphate nucleotidohydrolase, mitochondrial	GTPase HRas	Inosine-5-monophosphate dehydrogenase 2	Deoxyuridine 5-triphosphate nucleotidohydrolase, mitochondrial	GTPase HRas	Uridine-cytidine kinase 2	Uridine-cytidine kinase 2	Uridine-cytidine kinase 2		GTPase HRas	Proto-oncogene tyrosine-protein kinase LCK	Endoplasmic reticulum mannosyl-oligosaccharide 1,2-alpha-mannosidase		GTPase HRas	Sulfotransferase family cytosolic 2B member 1	Sulfotransferase family cytosolic 2B member 1		Estradiol 17-beta-dehydrogenase 1	Estradiol 17-beta-dehydrogenase 1	Estradiol 17-beta-dehydrogenase 1		Caspase-3		NONE	Estrogen receptor beta		Glutathione S-transferase P	ADAM 33	Cathepsin B	Aldose reductase	Cathepsin K	Beta-secretase 1	Carbonic anhydrase 2	Alcohol dehydrogenase class-3	Alcohol dehydrogenase class-3		GTPase HRas	Uridine-cytidine kinase 2	Deoxycytidine kinase		Proto-oncogene tyrosine-protein kinase ABL1	Proto-oncogene tyrosine-protein kinase ABL1	Proto-oncogene tyrosine-protein kinase ABL1	Proto-oncogene tyrosine-protein kinase ABL1	Proto-oncogene tyrosine-protein kinase ABL1	Proto-oncogene tyrosine-protein kinase LCK	Proto-oncogene tyrosine-protein kinase ABL1		Estradiol 17-beta-dehydrogenase 1	GTPase HRas
Stromelysin-1	Phosphoenolpyruvate carboxykinase, cytosolic [GTP]	Glucose-6-phosphate isomerase	Stromelysin-1	GTPase HRas	UDP-N-acetylhexosamine pyrophosphorylase	UDP-N-acetylhexosamine pyrophosphorylase	6-phosphofructo-2-kinase/fructose-2,6-biphosphatase 1		Dihydrofolate reductase	Coagulation factor VII	NAD-dependent deacetylase sirtuin-5		Tyrosine-protein kinase BTK	Sulfotransferase family cytosolic 2B member 1	Tyrosine-protein phosphatase non-receptor type 1		Mitogen-activated protein kinase 14	Estrogen-related receptor gamma	Mitogen-activated protein kinase 14		Sulfotransferase family cytosolic 2B member 1		Beta-secretase 1	cAMP-dependent protein kinase catalytic subunit alpha		Glutathione S-transferase A1	Cathepsin S	Phosphoenolpyruvate carboxykinase, cytosolic [GTP]	Cathepsin S	GTPase HRas	Tyrosine-protein kinase HCK	Neprilysin	cAMP-specific 3,5-cyclic phosphodiesterase 4D	Tyrosine-protein phosphatase non-receptor type 1		Uridine-cytidine kinase 2	Phosphoenolpyruvate carboxykinase, cytosolic [GTP]	Uridine-cytidine kinase 2		Hexokinase-1	Proto-oncogene tyrosine-protein kinase ABL1	Proto-oncogene tyrosine-protein kinase ABL1	Proto-oncogene tyrosine-protein kinase ABL1	Proto-oncogene tyrosine-protein kinase ABL1	Proto-oncogene tyrosine-protein kinase ABL1	Proto-oncogene tyrosine-protein kinase ABL1		Basic fibroblast growth factor receptor 1	Estradiol 17-beta-dehydrogenase 1
Angiotensin-converting enzyme	UDP-N-acetylhexosamine pyrophosphorylase	GTPase HRas	Angiotensin-converting enzyme	Apoptotic protease-activating factor 1	UDP-N-acetylhexosamine pyrophosphorylase	GTPase HRas	Sulfotransferase family cytosolic 2B member 1		Deoxycytidine kinase	ADP-ribosylation factor-like protein 5B	Fibrinogen gamma chain		Non-secretory ribonuclease	Ras-related protein Rap-2a	Pyruvate kinase isozymes R/L		Basic fibroblast growth factor receptor 1	Mitogen-activated protein kinase 14	Basic fibroblast growth factor receptor 1		Cyclin-A2		Leukocyte elastase	Phosphatidylcholine transfer protein		Glutathione S-transferase P	Beta-secretase 1	Alcohol dehydrogenase class-3	Beta-secretase 1	Aldose reductase	Neprilysin	Farnesyl pyrophosphate synthetase	Cathepsin S	Tyrosine-protein kinase HCK		UDP-N-acetylhexosamine pyrophosphorylase	Uridine-cytidine kinase 2	Beta-secretase 1		Proto-oncogene tyrosine-protein kinase ABL1	Proto-oncogene tyrosine-protein kinase LCK	Proto-oncogene tyrosine-protein kinase LCK	Proto-oncogene tyrosine-protein kinase LCK	Proto-oncogene tyrosine-protein kinase LCK	Proto-oncogene tyrosine-protein kinase LCK	Mitogen-activated protein kinase 14		Cell division protein kinase 2	NAD(P)H dehydrogenase [quinone] 1
Thymidine kinase, cytosolic	RAC-alpha serine/threonine-protein kinase	NONE	Thymidine kinase, cytosolic	Ras-related protein Rap-2a	GTPase HRas	GTPase HRas	NONE		C-C motif chemokine 5	6-phosphofructo-2-kinase/fructose-2,6-biphosphatase 1	6-phosphofructo-2-kinase/fructose-2,6-biphosphatase 1		Angiogenin	GTPase HRas	6-phosphofructo-2-kinase/fructose-2,6-biphosphatase 1		Transthyretin	Cellular retinoic acid-binding protein 2	Phosphatidylcholine transfer protein		Angiotensin-converting enzyme		NONE	Glutathione S-transferase theta-2		Glutathione S-transferase P	Glutathione S-transferase A1	Cathepsin K	Uridine-cytidine kinase 2	Glutathione S-transferase theta-2	3-hydroxy-3-methylglutaryl-coenzyme A reductase	Alcohol dehydrogenase class-3	Tyrosine-protein phosphatase non-receptor type 1	Cytochrome P450 2C9		UDP-N-acetylhexosamine pyrophosphorylase	Ras-related protein Rap-2a	Inositol monophosphatase		Proto-oncogene tyrosine-protein kinase LCK	Glutathione S-transferase P	Proto-oncogene tyrosine-protein kinase LCK	Proto-oncogene tyrosine-protein kinase LCK	Angiopoietin-1 receptor	Proto-oncogene tyrosine-protein kinase ABL1	Mitogen-activated protein kinase 14		Cellular retinoic acid-binding protein 2	Uridine-cytidine kinase 2
Tyrosine-protein kinase HCK	UDP-N-acetylhexosamine pyrophosphorylase	GTPase HRas	Tyrosine-protein kinase HCK	Antigen peptide transporter 1	Deoxycytidine kinase	UDP-N-acetylhexosamine pyrophosphorylase	Ras-related protein Rap-2a		Glycogen synthase kinase-3 beta	Ras-related C3 botulinum toxin substrate 1	Death-associated protein kinase 1		Glutathione S-transferase A1	Phosphoenolpyruvate carboxykinase, cytosolic [GTP]	Tyrosine-protein phosphatase non-receptor type 1		Serine/threonine-protein phosphatase PP1-gamma catalytic subunit	Dual specificity mitogen-activated protein kinase kinase 1	NONE		6-phosphofructo-2-kinase/fructose-2,6-biphosphatase 1		Peroxisome proliferator-activated receptor delta	Prothrombin		Glutathione-requiring prostaglandin D synthase	Alcohol dehydrogenase class-3	Aldose reductase	Alcohol dehydrogenase class-3	Glutathione S-transferase P	Beta-secretase 1	cGMP-specific 3,5-cyclic phosphodiesterase	Cytochrome P450 2C9	Proto-oncogene tyrosine-protein kinase LCK		UDP-N-acetylhexosamine pyrophosphorylase	RAC-alpha serine/threonine-protein kinase	Hexokinase-1		GTPase HRas	Eosinophil cationic protein	Prothrombin	Renin	Mitogen-activated protein kinase 14	Uridine-cytidine kinase 2	Proto-oncogene tyrosine-protein kinase LCK		Inositol monophosphatase	Cytochrome P450 2C9
Cathepsin K	Uridine-cytidine kinase 2	Uridine-cytidine kinase 2	Cathepsin K	Angiogenin	Alcohol dehydrogenase class-3	Inosine-5-monophosphate dehydrogenase 2	GTPase HRas		Death-associated protein kinase 1	GTPase HRas	Salivary alpha-amylase		Ornithine carbamoyltransferase, mitochondrial	3 histone mRNA exonuclease 1	Ras-related protein Rap-2a		Tyrosine-protein phosphatase non-receptor type 1	Sex hormone-binding globulin	Estradiol 17-beta-dehydrogenase 1		Arginase-1		Serine/threonine-protein phosphatase PP1-gamma catalytic subunit	Beta-secretase 1		Glutathione S-transferase P	Uridine-cytidine kinase 2	Beta-secretase 1	Cathepsin S	Beta-secretase 1	Cathepsin S	Prothrombin	3-hydroxy-3-methylglutaryl-coenzyme A reductase	Aldo-keto reductase family 1 member C2		Hexokinase-1	Bile salt sulfotransferase	GTPase HRas		Proto-oncogene tyrosine-protein kinase LCK	Proto-oncogene tyrosine-protein kinase LCK	Mitogen-activated protein kinase 14	Mitogen-activated protein kinase 14	Renin	Vascular endothelial growth factor receptor 2	Mitogen-activated protein kinase 14		Cell division protein kinase 2	Cellular retinoic acid-binding protein 2
Neprilysin	Antigen peptide transporter 1	GMP reductase 1	Neprilysin	NONE	Deoxyuridine 5-triphosphate nucleotidohydrolase, mitochondrial	Uridine-cytidine kinase 2	Bifunctional heparan sulfate N-deacetylase/N-sulfotransferase 1		Cell division protein kinase 2	Beta-secretase 1	Interleukin-2		Farnesyl pyrophosphate synthetase	Cystathionine beta-synthase	Riboflavin kinase		NONE	Basic fibroblast growth factor receptor 1	Transthyretin		Tyrosine-protein phosphatase non-receptor type 1		Tyrosine-protein phosphatase non-receptor type 1	NONE		Glutathione S-transferase theta-2	Beta-secretase 1	Macrophage metalloelastase	Beta-secretase 1	Cathepsin S	Beta-secretase 1	Cathepsin K	cAMP-specific 3,5-cyclic phosphodiesterase 4D	Aldose reductase		GTPase HRas	NONE	Death-associated protein kinase 1		Proto-oncogene tyrosine-protein kinase LCK	Uridine-cytidine kinase 2	Proto-oncogene tyrosine-protein kinase LCK	Mitogen-activated protein kinase 14	Mitogen-activated protein kinase 14	Riboflavin kinase	Renin		Beta-secretase 1	Cell division protein kinase 2
Amine oxidase [flavin-containing] B	Riboflavin kinase	Amine oxidase [flavin-containing] B	Amine oxidase [flavin-containing] B	Phosphoenolpyruvate carboxykinase, cytosolic [GTP]	Riboflavin kinase	Hypoxanthine-guanine phosphoribosyltransferase	GTPase HRas		Beta-hexosaminidase beta chain	CD209 antigen	Prothrombin		Tyrosine-protein phosphatase non-receptor type 1	Pyruvate kinase isozymes R/L	Non-secretory ribonuclease		Tyrosine-protein phosphatase non-receptor type 1	Ferrochelatase, mitochondrial	Peptidyl-prolyl cis-trans isomerase FKBP1A		Uridine-cytidine kinase 2		Estradiol 17-beta-dehydrogenase 1	Prothrombin		Neprilysin	Glutathione S-transferase P	Macrophage metalloelastase	Trifunctional purine biosynthetic protein adenosine-3	Inositol monophosphatase	cAMP-specific 3,5-cyclic phosphodiesterase 4D	Tyrosine-protein phosphatase non-receptor type 1	Serum albumin	Serum albumin		Ras-related protein Rab-5A	6-phosphofructo-2-kinase/fructose-2,6-biphosphatase 1	Ras-related protein Rab-5A		NONE	Hexokinase-1	Trifunctional purine biosynthetic protein adenosine-3	Vascular endothelial growth factor receptor 2	Beta-secretase 1	Beta-secretase 1	Transforming growth factor beta-2		GTPase HRas	Cell division protein kinase 2
Amine oxidase [flavin-containing] B	6-phosphofructo-2-kinase/fructose-2,6-biphosphatase 1	Deoxyuridine 5-triphosphate nucleotidohydrolase, mitochondrial	Amine oxidase [flavin-containing] B	6-phosphofructo-2-kinase/fructose-2,6-biphosphatase 1	Thymidine kinase, cytosolic	UDP-N-acetylhexosamine pyrophosphorylase	Angiogenin		NAD-dependent deacetylase sirtuin-5	GTPase HRas	Death-associated protein kinase 1		Scavenger mRNA-decapping enzyme DcpS	RAC-alpha serine/threonine-protein kinase	Proto-oncogene tyrosine-protein kinase Src		Retinoic acid receptor RXR-alpha	Gastrotropin	Flavin reductase		Farnesyl pyrophosphate synthetase		Dihydroorotate dehydrogenase, mitochondrial	Mast/stem cell growth factor receptor		Maleylacetoacetate isomerase	Dipeptidase 1	Neprilysin	Cathepsin K	Glutathione S-transferase P	Proto-oncogene tyrosine-protein kinase LCK	cGMP-specific 3,5-cyclic phosphodiesterase	Beta-secretase 1	Farnesyl pyrophosphate synthetase		Deoxyuridine 5-triphosphate nucleotidohydrolase, mitochondrial	Pyruvate kinase isozymes R/L	Nucleoside diphosphate kinase B		Pyruvate kinase isozymes R/L	Proto-oncogene tyrosine-protein kinase LCK	Serine/threonine-protein kinase Chk1	Mitogen-activated protein kinase 14	Heat shock protein HSP 90-alpha	Vascular endothelial growth factor receptor 2	Cathepsin K		Glutathione S-transferase A1	Heat shock protein HSP 90-alpha
Amine oxidase [flavin-containing] B	Ras-related protein Rap-2a	Antigen peptide transporter 1	Amine oxidase [flavin-containing] B	Insulin receptor	Thymidine kinase, cytosolic	Sulfotransferase 1A1	3 histone mRNA exonuclease 1		Proto-oncogene tyrosine-protein kinase LCK	Adenosine kinase	Riboflavin kinase		RAC-alpha serine/threonine-protein kinase	Non-secretory ribonuclease	Proto-oncogene tyrosine-protein kinase Src		Serine/threonine-protein phosphatase PP1-gamma catalytic subunit	Serine/threonine-protein phosphatase PP1-gamma catalytic subunit	Vitamin D3 receptor		Farnesyl pyrophosphate synthetase		Tyrosine-protein phosphatase non-receptor type 1	Glutathione S-transferase P		Sepiapterin reductase	Sulfotransferase family cytosolic 2B member 1	Beta-secretase 1	Cathepsin S	Beta-secretase 1	Caspase-1	Beta-secretase 1	Stromelysin-1	Cathepsin S		Thymidine kinase, cytosolic	Eukaryotic translation initiation factor 4E	Glutathione reductase, mitochondrial		6-phosphofructo-2-kinase/fructose-2,6-biphosphatase 1	Glutathione S-transferase P	Mast/stem cell growth factor receptor	Proto-oncogene tyrosine-protein kinase LCK	Proto-oncogene tyrosine-protein kinase LCK	Glutathione S-transferase P	Vascular endothelial growth factor receptor 2		Stromelysin-1	cAMP-dependent protein kinase catalytic subunit alpha
3-phosphoinositide-dependent protein kinase 1	Pyruvate kinase isozymes R/L	NONE	3-phosphoinositide-dependent protein kinase 1	Farnesyl pyrophosphate synthetase	UDP-N-acetylhexosamine pyrophosphorylase	NAD-dependent deacetylase sirtuin-5	Proto-oncogene serine/threonine-protein kinase Pim-1		Histidine triad nucleotide-binding protein 1	Hypoxanthine-guanine phosphoribosyltransferase	Leukocyte elastase		NONE	NONE	Rho-related GTP-binding protein RhoE		Tyrosine-protein phosphatase non-receptor type 1	E3 ubiquitin-protein ligase Mdm2	Serine/threonine-protein phosphatase PP1-gamma catalytic subunit		Insulin receptor		Tyrosine-protein phosphatase non-receptor type 1	Prothrombin		Glutathione S-transferase A1	Cathepsin S	Beta-secretase 1	Proto-oncogene tyrosine-protein kinase LCK	Beta-secretase 1	Vascular endothelial growth factor receptor 2	Beta-secretase 1	Tyrosine-protein phosphatase non-receptor type 1	Sulfotransferase family cytosolic 2B member 1		Amine oxidase [flavin-containing] B	Tyrosine-protein kinase BTK	GTPase HRas		NONE	Mitogen-activated protein kinase 14	Retinoic acid receptor gamma	Transforming growth factor beta-2	Mitogen-activated protein kinase 14	Beta-secretase 1	Proto-oncogene tyrosine-protein kinase LCK		Proto-oncogene tyrosine-protein kinase ABL1	Beta-secretase 1
3-phosphoinositide-dependent protein kinase 1	NONE	GMP reductase 2	3-phosphoinositide-dependent protein kinase 1	Riboflavin kinase	Uridine 5-monophosphate synthase	Deoxyuridine 5-triphosphate nucleotidohydrolase, mitochondrial	Phosphoenolpyruvate carboxykinase, cytosolic [GTP]		Sepiapterin reductase	Dihydrofolate reductase	Inositol-trisphosphate 3-kinase A		Tyrosine-protein phosphatase non-receptor type 1	GTPase HRas	Cystathionine beta-synthase		Retinoic acid receptor RXR-alpha	Retinoic acid receptor RXR-alpha	Serine/threonine-protein phosphatase PP1-gamma catalytic subunit		Ornithine aminotransferase, mitochondrial		Retinoic acid receptor RXR-alpha	Beta-secretase 1		Death-associated protein kinase 1	Neprilysin	NONE	Neprilysin	Farnesyl pyrophosphate synthetase	Alcohol dehydrogenase class-3	Beta-secretase 1	Tyrosine-protein phosphatase non-receptor type 1	Tyrosine-protein phosphatase non-receptor type 1		Amine oxidase [flavin-containing] B	Sulfotransferase family cytosolic 2B member 1	UDP-N-acetylhexosamine pyrophosphorylase		Sulfotransferase family cytosolic 2B member 1	Cathepsin K	Retinoic acid receptor gamma	Angiopoietin-1 receptor	Proto-oncogene tyrosine-protein kinase LCK	Cathepsin K	Angiopoietin-1 receptor		Transthyretin	Basic fibroblast growth factor receptor 1
3-phosphoinositide-dependent protein kinase 1	Riboflavin kinase	Pyruvate kinase isozymes R/L	3-phosphoinositide-dependent protein kinase 1	Proto-oncogene tyrosine-protein kinase Src	Amine oxidase [flavin-containing] B	Glucose-6-phosphate isomerase	NONE		Hypoxanthine-guanine phosphoribosyltransferase	Chitotriosidase-1	Tyrosine-protein phosphatase non-receptor type 1		Glucose-6-phosphate isomerase	NONE	Bifunctional heparan sulfate N-deacetylase/N-sulfotransferase 1		Vitamin D3 receptor	Transthyretin	Estrogen-related receptor gamma		Proto-oncogene tyrosine-protein kinase LCK		Alpha-tocopherol transfer protein	Renin		Ras-related protein Rap-2a	Glutathione S-transferase P	Cathepsin S	Aldo-keto reductase family 1 member C3	Alcohol dehydrogenase class-3	Cathepsin K	Heat shock protein HSP 90-alpha	Tyrosine-protein phosphatase non-receptor type 1	Cell division protein kinase 2		Ras-related protein Rap-2a	Thymidylate kinase	Phosphoenolpyruvate carboxykinase, cytosolic [GTP]		Inositol monophosphatase	Glutathione S-transferase P	Cathepsin K	Mast/stem cell growth factor receptor	Vascular endothelial growth factor receptor 2	Transforming growth factor beta-2	Mast/stem cell growth factor receptor		Cytochrome P450 2C9	cAMP-specific 3,5-cyclic phosphodiesterase 4D
3-phosphoinositide-dependent protein kinase 1	Angiogenin	Phosphoenolpyruvate carboxykinase, cytosolic [GTP]	3-phosphoinositide-dependent protein kinase 1	Early endosome antigen 1	Glutathione S-transferase P	Thymidylate kinase	Apoptotic protease-activating factor 1		3 histone mRNA exonuclease 1	Ras-related protein Rap-2a	C-C motif chemokine 5		Ornithine carbamoyltransferase, mitochondrial	Sulfotransferase 1A1	Ornithine aminotransferase, mitochondrial		Cellular retinoic acid-binding protein 2	Transthyretin	TGF-beta receptor type-1		Glutathione reductase, mitochondrial		Beta-secretase 1	Estrogen-related receptor gamma		Glutathione S-transferase P	Glutathione S-transferase P	Glutathione S-transferase P	Sulfotransferase family cytosolic 2B member 1	Cathepsin S	Stromelysin-1	Mitogen-activated protein kinase 14	Nuclear receptor subfamily 1 group I member 2	Tyrosine-protein phosphatase non-receptor type 1		Thymidylate kinase	Apoptotic protease-activating factor 1	Angiotensin-converting enzyme		Beta-hexosaminidase beta chain	Pyruvate kinase isozymes R/L	Renin	Serine/threonine-protein kinase Chk1	Heat shock protein HSP 90-alpha	Proto-oncogene tyrosine-protein kinase LCK	Beta-secretase 1		cAMP-specific 3,5-cyclic phosphodiesterase 4D	Tyrosine-protein phosphatase non-receptor type 1
3-phosphoinositide-dependent protein kinase 1	Serine/threonine-protein kinase 6	Hypoxanthine-guanine phosphoribosyltransferase	3-phosphoinositide-dependent protein kinase 1	Sulfotransferase family cytosolic 2B member 1	Uridine 5-monophosphate synthase	Apoptotic protease-activating factor 1	GTPase HRas		Death-associated protein kinase 1	Beta-secretase 1	3 histone mRNA exonuclease 1		Inosine-5-monophosphate dehydrogenase 2	Leukocyte elastase	GTPase HRas		Phosphatidylcholine transfer protein	Estrogen-related receptor gamma	Tyrosine-protein phosphatase non-receptor type 1		Glutathione reductase, mitochondrial		Coagulation factor X	Prothrombin		Mitogen-activated protein kinase 10	Prothrombin	Glutathione S-transferase A1	Caspase-1	Beta-secretase 1	Farnesyl pyrophosphate synthetase	Scavenger mRNA-decapping enzyme DcpS	Macrophage metalloelastase	Serum albumin		Amine oxidase [flavin-containing] B	Insulin receptor	Histidine triad nucleotide-binding protein 1		Uridine-cytidine kinase 2	Vascular endothelial growth factor receptor 2	Heat shock protein HSP 90-alpha	Neutrophil collagenase	Mitogen-activated protein kinase 14	Angiopoietin-1 receptor	B-Raf proto-oncogene serine/threonine-protein kinase		3-phosphoinositide-dependent protein kinase 1	Cyclin-A2
Triggering receptor expressed on myeloid cells 1	Death-associated protein kinase 1	Pyruvate kinase isozymes R/L	Triggering receptor expressed on myeloid cells 1	Phosphoenolpyruvate carboxykinase, cytosolic [GTP]	Beta-secretase 1	Hypoxanthine-guanine phosphoribosyltransferase	Pyruvate kinase isozymes R/L		Inositol monophosphatase	Caspase-3	Beta-secretase 1		Glucose-6-phosphate isomerase	NAD-dependent deacetylase sirtuin-5	Heat shock 70 kDa protein 1		Peptidyl-prolyl cis-trans isomerase FKBP1A	SEC14-like protein 2	Peptidyl-prolyl cis-trans isomerase FKBP1A		Cytochrome P450 2C9		Retinoic acid receptor gamma	Coagulation factor X		Fibrinogen gamma chain	Histo-blood group ABO system transferase	Beta-secretase 1	Beta-secretase 1	Renin	Androgen receptor	Heat shock protein HSP 90-alpha	Angiopoietin-1 receptor	Cathepsin B		Deoxycytidine kinase	Rho-related GTP-binding protein RhoE	Death-associated protein kinase 1		Glutathione S-transferase P	cAMP-specific 3,5-cyclic phosphodiesterase 4D	Chitotriosidase-1	Beta-secretase 1	Transforming growth factor beta-2	Mitogen-activated protein kinase 14	Heat shock protein HSP 90-alpha		Stromelysin-1	Caspase-3
Methionine aminopeptidase 2	Sulfotransferase family cytosolic 2B member 1	Deoxycytidine kinase	Methionine aminopeptidase 2	RAC-alpha serine/threonine-protein kinase	Glutathione S-transferase P	Uridine-cytidine kinase 2	Early endosome antigen 1		S-adenosylmethionine decarboxylase proenzyme	RAC-alpha serine/threonine-protein kinase	ADP-ribosylation factor-like protein 5A		GMP reductase 2	Proto-oncogene tyrosine-protein kinase Src	GTPase HRas		Vascular endothelial growth factor receptor 2	Retinoic acid receptor RXR-alpha	Vascular endothelial growth factor receptor 2		Phosphoenolpyruvate carboxykinase, cytosolic [GTP]		Retinoic acid receptor gamma	Coagulation factor X		Insulin receptor	Tryptophan 5-hydroxylase 1	Methionine aminopeptidase 2	Tyrosine-protein kinase HCK	Beta-secretase 1	cAMP-specific 3,5-cyclic phosphodiesterase 4D	Beta-secretase 1	3-hydroxy-3-methylglutaryl-coenzyme A reductase	Angiotensin-converting enzyme		Uridine-cytidine kinase 2	Nucleoside diphosphate kinase B	Methionine aminopeptidase 2		Glutathione S-transferase theta-2	Glutathione S-transferase P	Vascular endothelial growth factor receptor 2	Mitogen-activated protein kinase 14	Mitogen-activated protein kinase 14	Eukaryotic translation initiation factor 4E	Proto-oncogene tyrosine-protein kinase LCK		Vitamin D3 receptor	Catenin alpha-1
Histo-blood group ABO system transferase	Hypoxanthine-guanine phosphoribosyltransferase	Apoptotic protease-activating factor 1	Histo-blood group ABO system transferase	GTPase HRas	Glutathione S-transferase P	Deoxycytidine kinase	Riboflavin kinase		Dual specificity protein kinase CLK1	Inosine-5-monophosphate dehydrogenase 1	Delta-aminolevulinic acid dehydratase		Pyruvate kinase isozymes R/L	Bile salt sulfotransferase	Hypoxanthine-guanine phosphoribosyltransferase		Flavin reductase	Endothelial protein C receptor	Endothelial protein C receptor		Rho-related GTP-binding protein RhoE		3-hydroxy-3-methylglutaryl-coenzyme A reductase	Estrogen receptor		Glutathione S-transferase Mu 1	Leukotriene A-4 hydrolase	Neutrophil collagenase	Prothrombin	Neprilysin	Serine/threonine-protein phosphatase PP1-gamma catalytic subunit	Beta-secretase 1	3-hydroxy-3-methylglutaryl-coenzyme A reductase	Dipeptidase 1		Cathepsin K	Glycogen synthase kinase-3 beta	Histo-blood group ABO system transferase		Heat shock protein HSP 90-alpha	Beta-secretase 1	Vascular endothelial growth factor receptor 2	Beta-secretase 1	B-Raf proto-oncogene serine/threonine-protein kinase	Proto-oncogene tyrosine-protein kinase LCK	GTPase HRas		Heat shock protein HSP 90-alpha	Beta-secretase 1
Vascular endothelial growth factor receptor 2	Apoptotic protease-activating factor 1	5(3)-deoxyribonucleotidase, mitochondrial	Vascular endothelial growth factor receptor 2	Serine/threonine-protein kinase 6	GTPase HRas	Ras-related protein Rab-5A	Insulin receptor		Glutathione S-transferase Mu 1	Angiogenin	Proto-oncogene serine/threonine-protein kinase Pim-1		GTPase HRas	6-phosphofructo-2-kinase/fructose-2,6-biphosphatase 1	Ras-related protein Rap-2a		Estrogen-related receptor gamma	Sulfotransferase family cytosolic 2B member 1	Estrogen-related receptor gamma		Phosphoenolpyruvate carboxykinase, cytosolic [GTP]		Thyroid hormone receptor beta	72 kDa type IV collagenase		Glutathione S-transferase P	Dual specificity mitogen-activated protein kinase kinase 1	Renin	Beta-secretase 1	Insulin receptor	Heat shock protein HSP 90-alpha	Mitogen-activated protein kinase 14	Peptidyl-prolyl cis-trans isomerase FKBP1A	B-Raf proto-oncogene serine/threonine-protein kinase		Sulfotransferase family cytosolic 2B member 1	Uridine-cytidine kinase 2	Aldose reductase		UDP-N-acetylhexosamine pyrophosphorylase	Phosphoenolpyruvate carboxykinase, cytosolic [GTP]	Tyrosine-protein kinase ZAP-70	Dipeptidase 1	Mast/stem cell growth factor receptor	Beta-secretase 1	Mitogen-activated protein kinase 14		Tyrosine-protein phosphatase non-receptor type 1	Glutathione S-transferase A1
Cell division protein kinase 2	Early endosome antigen 1	Glutathione S-transferase P	Cell division protein kinase 2	Pyruvate kinase isozymes R/L	Uridine 5-monophosphate synthase	Sulfotransferase family cytosolic 2B member 1	Phosphoenolpyruvate carboxykinase, cytosolic [GTP]		Pancreatic alpha-amylase	GTPase HRas	Lithostathine-1-alpha		Dihydrofolate reductase	Cell division protein kinase 2	Nuclear receptor ROR-alpha		Endothelial protein C receptor	Oxysterols receptor LXR-beta	Dual specificity mitogen-activated protein kinase kinase 1		NONE		Tyrosine-protein phosphatase non-receptor type 1	Estrogen-related receptor gamma		Alcohol dehydrogenase class-3	Cathepsin K	Cathepsin F	Beta-secretase 1	Glutathione S-transferase A1	Cathepsin S	Glutathione S-transferase A1	Tyrosine-protein phosphatase non-receptor type 1	Proto-oncogene tyrosine-protein kinase Src		GTP-binding nuclear protein Ran	Riboflavin kinase	tRNA (cytosine-5-)-methyltransferase		UDP-N-acetylhexosamine pyrophosphorylase	Angiogenin	Vitamin D3 receptor	Cathepsin K	Beta-secretase 1	Renin	Glutathione S-transferase P		Cell division protein kinase 2	Cell division protein kinase 2
Glutathione S-transferase P	Thymidylate kinase	Uridine-cytidine kinase 2	Glutathione S-transferase P	Stromelysin-1	Thymidylate kinase	Death-associated protein kinase 1	Uridine-cytidine kinase 2		RAC-alpha serine/threonine-protein kinase	Tyrosine-protein phosphatase non-receptor type 1	Transforming growth factor beta-2		Glutathione S-transferase P	3-phosphoinositide-dependent protein kinase 1	Uridine-cytidine kinase 2		Estrogen-related receptor gamma	Peptidyl-prolyl cis-trans isomerase FKBP1A	Corticosteroid 11-beta-dehydrogenase isozyme 1		Phospholipase A2, membrane associated		72 kDa type IV collagenase	Coagulation factor X		Glutathione S-transferase P	Tryptase beta-2	Leukotriene A-4 hydrolase	Histo-blood group ABO system transferase	Leukocyte elastase	Tyrosine-protein phosphatase non-receptor type 1	NONE	Corticosteroid 11-beta-dehydrogenase isozyme 1	ADAM 33		L-lactate dehydrogenase B chain	Phosphoenolpyruvate carboxykinase, cytosolic [GTP]	Trifunctional purine biosynthetic protein adenosine-3		Cathepsin K	Glutathione S-transferase theta-2	Mitogen-activated protein kinase 14	Proto-oncogene tyrosine-protein kinase LCK	Cathepsin K	Stromelysin-1	Neutrophil collagenase		Carbonic anhydrase 2	Beta-secretase 1
Fibrinogen gamma chain	Riboflavin kinase	Sulfotransferase family cytosolic 2B member 1	Fibrinogen gamma chain	NONE	Antigen peptide transporter 1	Early endosome antigen 1	Deoxyuridine 5-triphosphate nucleotidohydrolase, mitochondrial		Riboflavin kinase	Aldose reductase	Proto-oncogene tyrosine-protein kinase Src		Bifunctional 3-phosphoadenosine 5-phosphosulfate synthetase 1	Leukocyte elastase	Glucose-6-phosphate isomerase		Bile salt sulfotransferase	Methionine aminopeptidase 2	Tyrosine-protein phosphatase non-receptor type 1		Glutathione S-transferase P		Proactivator polypeptide	Estrogen receptor		Glutathione S-transferase P	Glutathione S-transferase P	ADAM 33	Caspase-3	Branched-chain-amino-acid aminotransferase, mitochondrial	NONE	B-Raf proto-oncogene serine/threonine-protein kinase	Mitogen-activated protein kinase 14	Glutathione S-transferase A1		Glucose-6-phosphate isomerase	Sulfotransferase 1A1	Glutathione S-transferase P		Angiopoietin-1 receptor	GTPase HRas	Glutathione S-transferase A1	Aldose reductase	Beta-secretase 1	Heat shock protein HSP 90-alpha	Proto-oncogene tyrosine-protein kinase LCK		Estradiol 17-beta-dehydrogenase 1	Heat shock protein HSP 90-alpha
Dihydroorotate dehydrogenase, mitochondrial	Deoxyuridine 5-triphosphate nucleotidohydrolase, mitochondrial	Alcohol dehydrogenase class-3	Dihydroorotate dehydrogenase, mitochondrial	Pyruvate kinase isozymes R/L	Protein-glutamine gamma-glutamyltransferase E	Pyruvate kinase isozymes R/L	RAC-alpha serine/threonine-protein kinase		Glutathione S-transferase Mu 2	3 histone mRNA exonuclease 1	Chitotriosidase-1		Death-associated protein kinase 1	Bifunctional heparan sulfate N-deacetylase/N-sulfotransferase 1	Complement component C8 gamma chain		E3 ubiquitin-protein ligase Mdm2	Estrogen-related receptor gamma	Aldo-keto reductase family 1 member C3		Proto-oncogene tyrosine-protein kinase Src		Retinoic acid receptor RXR-alpha	Estradiol 17-beta-dehydrogenase 1		Sulfotransferase family cytosolic 2B member 1	FK506-binding protein 3	Peptidyl-prolyl cis-trans isomerase FKBP1A	Beta-secretase 1	Glutathione S-transferase P	Bile acid receptor	B-Raf proto-oncogene serine/threonine-protein kinase	Collagenase 3	Beta-secretase 1		Insulin receptor	GTPase HRas	Glutathione S-transferase P		Early endosome antigen 1	Heat shock protein HSP 90-alpha	Beta-secretase 1	Androgen receptor	Glutathione S-transferase A1	Beta-secretase 1	Proto-oncogene tyrosine-protein kinase LCK		Hepatocyte growth factor receptor	Aldo-keto reductase family 1 member C3
Proto-oncogene tyrosine-protein kinase LCK	GTPase HRas	6-phosphofructo-2-kinase/fructose-2,6-biphosphatase 1	Proto-oncogene tyrosine-protein kinase LCK	Sulfotransferase 1A1	Glutathione S-transferase P	Thymidylate kinase	Death-associated protein kinase 1		Protein-glutamine gamma-glutamyltransferase E	NAD-dependent malic enzyme, mitochondrial	Matrix metalloproteinase-16		Pyruvate kinase isozymes R/L	Cell division protein kinase 2	Glutathione S-transferase P		Dual specificity mitogen-activated protein kinase kinase 1	cAMP-dependent protein kinase catalytic subunit alpha	Mitogen-activated protein kinase 10		L-serine dehydratase		Tyrosine-protein phosphatase non-receptor type 1	Tyrosine-protein phosphatase non-receptor type 1		Proto-oncogene serine/threonine-protein kinase Pim-1	Farnesyl pyrophosphate synthetase	Matrix metalloproteinase-9	Cell division protein kinase 2	Glutathione S-transferase Mu 1	Glutathione S-transferase A1	Stromelysin-1	Serine/threonine-protein phosphatase PP1-gamma catalytic subunit	Serum albumin		Nitric oxide synthase, inducible	Riboflavin kinase	Glutathione S-transferase Mu 2		Protein-glutamine gamma-glutamyltransferase E	NONE	Dipeptidase 1	Heat shock protein HSP 90-alpha	Vitamin D3 receptor	Vitamin D3 receptor	Beta-secretase 1		Uridine-cytidine kinase 2	Androgen receptor
Proto-oncogene tyrosine-protein kinase Src	Phosphoenolpyruvate carboxykinase, cytosolic [GTP]	Angiogenin	Proto-oncogene tyrosine-protein kinase Src	Pyruvate kinase isozymes R/L	Adenosine kinase	GMP reductase 2	Sulfotransferase 1A1		Ephrin type-A receptor 2	NONE	Neuronal calcium sensor 1		Glutathione S-transferase P	L-serine dehydratase	Neutrophil collagenase		Peptidyl-prolyl cis-trans isomerase FKBP1A	SEC14-like protein 2	Sulfotransferase family cytosolic 2B member 1		Triosephosphate isomerase		Glutathione S-transferase theta-2	Proto-oncogene tyrosine-protein kinase LCK		GTPase HRas	Beta-secretase 1	B-Raf proto-oncogene serine/threonine-protein kinase	Cathepsin B	Glutathione S-transferase P	3-hydroxy-3-methylglutaryl-coenzyme A reductase	Beta-secretase 1	Bile acid receptor	Beta-secretase 1		Phenylethanolamine N-methyltransferase	Farnesyl pyrophosphate synthetase	Ras-related protein Rap-2a		Glutathione S-transferase A1	Tyrosine-protein phosphatase non-receptor type 1	Isovaleryl-CoA dehydrogenase, mitochondrial	Beta-secretase 1	Isovaleryl-CoA dehydrogenase, mitochondrial	Beta-secretase 1	Mitogen-activated protein kinase 14		Coagulation factor XI	Beta-secretase 1
Dipeptidase 1	GTPase HRas	Ras-related protein Rab-5A	Dipeptidase 1	Ras-related protein Rab-5A	5(3)-deoxyribonucleotidase, mitochondrial	Phosphoenolpyruvate carboxykinase, cytosolic [GTP]	Bifunctional purine biosynthesis protein PURH		Glutathione S-transferase Mu 2	Tyrosine-protein kinase BTK	NAD-dependent malic enzyme, mitochondrial		Phosphoenolpyruvate carboxykinase, cytosolic [GTP]	3-phosphoinositide-dependent protein kinase 1	Inosine-5-monophosphate dehydrogenase 2		Hepatocyte growth factor receptor	Mitogen-activated protein kinase 10	Neprilysin		5(3)-deoxyribonucleotidase, mitochondrial		Retinoic acid receptor gamma	Prothrombin		Sulfotransferase 1A1	Beta-secretase 1	Tyrosine-protein kinase HCK	Tyrosine-protein phosphatase non-receptor type 1	Cathepsin S	Beta-secretase 1	Beta-hexosaminidase beta chain	Aldo-keto reductase family 1 member C3	Beta-secretase 1		5(3)-deoxyribonucleotidase, mitochondrial	Non-secretory ribonuclease	NONE		cAMP-specific 3,5-cyclic phosphodiesterase 4D	Eukaryotic translation initiation factor 4E	NONE	Endothelial protein C receptor	Serum albumin	Vascular endothelial growth factor receptor 2	Beta-secretase 1		Nuclear receptor subfamily 1 group I member 2	Methionine aminopeptidase 2
Cyclin-A2	Insulin receptor	3 histone mRNA exonuclease 1	Cyclin-A2	Thymidylate kinase	Leukocyte elastase	Ras-related protein Rap-2a	Glucose-6-phosphate isomerase		Aldose reductase	Death-associated protein kinase 1	Glutathione S-transferase Mu 2		CD209 antigen	Cell division protein kinase 2	Eukaryotic translation initiation factor 4E		Sulfotransferase family cytosolic 2B member 1	Corticosteroid 11-beta-dehydrogenase isozyme 1	Retinoic acid receptor RXR-alpha		GTPase HRas		Bile acid receptor	Cell division protein kinase 2		Dipeptidase 1	Beta-secretase 1	Matrix metalloproteinase-9	Leukotriene A-4 hydrolase	ADP-ribosylation factor 4	Beta-secretase 1	Beta-secretase 1	3-hydroxy-3-methylglutaryl-coenzyme A reductase	Tyrosine-protein phosphatase non-receptor type 1		Riboflavin kinase	Pyruvate kinase isozymes R/L	Glutathione S-transferase P		Angiogenin	Sulfotransferase 1A1	Heat shock protein HSP 90-alpha	NONE	Neutrophil collagenase	Prothrombin	Prothrombin		Methionine aminopeptidase 2	NONE
Phenylalanine-4-hydroxylase	Kinesin-like protein KIF11	UDP-N-acetylhexosamine pyrophosphorylase	Phenylalanine-4-hydroxylase	Aldose reductase	Cathepsin K	Bile salt sulfotransferase	Proto-oncogene tyrosine-protein kinase Src		NONE	Thymidylate kinase	Proto-oncogene serine/threonine-protein kinase Pim-1		Ras-related C3 botulinum toxin substrate 1	Glucose-6-phosphate isomerase	Tyrosine-protein phosphatase non-receptor type 1		Tyrosine-protein phosphatase non-receptor type 1	Estrogen receptor	Oxysterols receptor LXR-beta		Branched-chain-amino-acid aminotransferase, mitochondrial		Bile acid receptor	Beta-secretase 1		Glutathione S-transferase Mu 1	Tyrosine-protein phosphatase non-receptor type 1	Matrilysin	Beta-secretase 1	Caspase-3	Leukotriene A-4 hydrolase	Proto-oncogene tyrosine-protein kinase LCK	3-hydroxy-3-methylglutaryl-coenzyme A reductase	Cathepsin K		Glucose-6-phosphate isomerase	Antigen peptide transporter 1	Glutathione S-transferase P		Farnesyl pyrophosphate synthetase	NONE	Transforming growth factor beta-2	B-Raf proto-oncogene serine/threonine-protein kinase	Heat shock protein HSP 90-alpha	Beta-secretase 1	Glutathione S-transferase P		Beta-secretase 1	3-phosphoinositide-dependent protein kinase 1
cAMP-dependent protein kinase catalytic subunit alpha	Focal adhesion kinase 1	NAD-dependent deacetylase sirtuin-5	cAMP-dependent protein kinase catalytic subunit alpha	Thymidylate kinase	Hypoxanthine-guanine phosphoribosyltransferase	Angiogenin	GTPase HRas		Antigen peptide transporter 1	ADP-ribosylation factor-like protein 5A	Glutathione S-transferase P		Protein-glutamine gamma-glutamyltransferase E	Interferon-stimulated gene 20 kDa protein	Proto-oncogene tyrosine-protein kinase Src		Oxysterols receptor LXR-beta	Androgen receptor	SEC14-like protein 2		Glycogen synthase kinase-3 beta		Vitamin D3 receptor	Estrogen receptor beta		NONE	Heat shock protein HSP 90-alpha	Matrix metalloproteinase-16	Cyclin-A2	Eukaryotic translation initiation factor 4E	Androgen receptor	Serine/threonine-protein phosphatase PP1-gamma catalytic subunit	Proto-oncogene tyrosine-protein kinase LCK	Cellular retinoic acid-binding protein 2		Glycogen synthase kinase-3 beta	Deoxycytidine kinase	ADP-ribosylation factor-like protein 5B		Proto-oncogene tyrosine-protein kinase Src	Prothrombin	Cell division protein kinase 2	Aldose reductase	NONE	Vascular endothelial growth factor receptor 2	Cell division protein kinase 2		Catenin alpha-1	Neprilysin
Glutathione S-transferase P	NAD-dependent deacetylase sirtuin-5	UDP-N-acetylhexosamine pyrophosphorylase	Glutathione S-transferase P	Deoxyuridine 5-triphosphate nucleotidohydrolase, mitochondrial	Glutathione S-transferase theta-2	Histidine triad nucleotide-binding protein 1	Mitogen-activated protein kinase 12		E-selectin	Thymidylate kinase	Protein-glutamine gamma-glutamyltransferase E		3 histone mRNA exonuclease 1	Cyclin-A2	Tyrosine-protein phosphatase non-receptor type 1		Mitogen-activated protein kinase 10	Phosphatidylcholine transfer protein	Transthyretin		Fatty acid-binding protein, heart		Bile acid receptor	Interleukin-2		RAC-alpha serine/threonine-protein kinase	Beta-secretase 1	Interstitial collagenase	Beta-secretase 1	Trifunctional purine biosynthetic protein adenosine-3	Androgen receptor	Beta-secretase 1	Angiotensin-converting enzyme	Cystathionine beta-synthase		ADAM 33	Non-secretory ribonuclease	Ras-related protein Rab-9		GTPase HRas	Farnesyl pyrophosphate synthetase	Aldose reductase	Beta-secretase 1	Proto-oncogene tyrosine-protein kinase LCK	Heat shock protein HSP 90-alpha	Heat shock protein HSP 90-alpha		NAD(P)H dehydrogenase [quinone] 1	Beta-secretase 1
Insulin-like growth factor 1 receptor	Proto-oncogene tyrosine-protein kinase Src	Ras-related protein Rap-2a	Insulin-like growth factor 1 receptor	Coagulation factor VII	GMP reductase 2	GMP reductase 1	Trifunctional purine biosynthetic protein adenosine-3		Kinesin-like protein KIF11	Glutathione S-transferase Mu 2	Proto-oncogene serine/threonine-protein kinase Pim-1		Pyruvate kinase isozymes R/L	Heat shock protein HSP 90-alpha	Tyrosine-protein phosphatase non-receptor type 1		Ferrochelatase, mitochondrial	Kinesin-like protein KIF11	Tyrosine-protein phosphatase non-receptor type 1		Glutathione S-transferase P		Retinoic acid receptor RXR-alpha	Prothrombin		Glutathione S-transferase P	Tyrosine-protein phosphatase non-receptor type 1	Tyrosine-protein phosphatase non-receptor type 1	NONE	Aldo-keto reductase family 1 member C2	Peptidyl-prolyl cis-trans isomerase FKBP1A	ADAM 33	Cyclin-A2	Cathepsin S		RAC-alpha serine/threonine-protein kinase	Eukaryotic translation initiation factor 4E	Phenylethanolamine N-methyltransferase		Inositol monophosphatase	Glutathione S-transferase P	Vitamin D3 receptor	Glucokinase	Beta-secretase 1	Deoxycytidine kinase	Coagulation factor X		Androgen receptor	Carbonic anhydrase 2
Lysozyme C	Eukaryotic translation initiation factor 4E	tRNA (cytosine-5-)-methyltransferase	Lysozyme C	Rho-related GTP-binding protein RhoE	Inositol monophosphatase	Scavenger mRNA-decapping enzyme DcpS	5(3)-deoxyribonucleotidase, mitochondrial		ADP-ribosylation factor 4	Hypoxanthine-guanine phosphoribosyltransferase	Dual specificity protein kinase CLK1		Phosphoenolpyruvate carboxykinase, cytosolic [GTP]	Nicotinamide mononucleotide adenylyltransferase 3	Proto-oncogene tyrosine-protein kinase LCK		Tyrosine-protein phosphatase non-receptor type 1	Estradiol 17-beta-dehydrogenase 1	Beta-secretase 1		3-hydroxy-3-methylglutaryl-coenzyme A reductase		Retinoic acid receptor RXR-alpha	Estrogen-related receptor gamma		Apolipoprotein(a)	Cathepsin B	Stromelysin-1	Renin	Ornithine carbamoyltransferase, mitochondrial	Corticosteroid 11-beta-dehydrogenase isozyme 1	Mitogen-activated protein kinase 14	Tyrosine-protein phosphatase non-receptor type 1	Neprilysin		Death-associated protein kinase 1	GTPase HRas	Ras-related protein Rab-11A		Cell division protein kinase 2	Mitogen-activated protein kinase 14	Aldose reductase	Proto-oncogene tyrosine-protein kinase LCK	Eukaryotic translation initiation factor 4E	GTPase HRas	Transthyretin		Neprilysin	Histo-blood group ABO system transferase
Vascular endothelial growth factor receptor 2	Histidine triad nucleotide-binding protein 1	Death-associated protein kinase 1	Vascular endothelial growth factor receptor 2	Eukaryotic translation initiation factor 4E	GMP reductase 1	Adenosine kinase	Tyrosine-protein kinase BTK		Glycogen synthase kinase-3 beta	Death-associated protein kinase 1	ADP-ribosylation factor-like protein 5B		Protein-glutamine gamma-glutamyltransferase 2	Death-associated protein kinase 1	Proto-oncogene tyrosine-protein kinase Src		Transthyretin	cAMP-dependent protein kinase catalytic subunit alpha	cAMP-dependent protein kinase catalytic subunit alpha		Heparin-binding growth factor 1		Bile acid receptor	E3 ubiquitin-protein ligase Mdm2		3-hydroxy-3-methylglutaryl-coenzyme A reductase	Phosphatidylinositol 3-kinase regulatory subunit alpha	Glycogen synthase kinase-3 beta	Tyrosine-protein phosphatase non-receptor type 1	Glutathione S-transferase P	Beta-secretase 1	Proto-oncogene tyrosine-protein kinase ABL1	Tryptase beta-2	Heat shock protein HSP 90-alpha		Uridine 5-monophosphate synthase	Thymidylate kinase	Ras-related protein Rab-5A		Mast/stem cell growth factor receptor	Serum albumin	Mitogen-activated protein kinase 10	Dihydroorotate dehydrogenase, mitochondrial	Aldose reductase	Phosphoenolpyruvate carboxykinase, cytosolic [GTP]	Beta-secretase 1		Mitogen-activated protein kinase 14	Vitamin D3 receptor
Cell division protein kinase 2	Mitogen-activated protein kinase 12	Urokinase-type plasminogen activator	Cell division protein kinase 2	Prostatic acid phosphatase	Angiotensin-converting enzyme	Bifunctional purine biosynthesis protein PURH	Eukaryotic translation initiation factor 4E		Bifunctional purine biosynthesis protein PURH	Early endosome antigen 1	ADAM 33		Protein-glutamine gamma-glutamyltransferase E	Cell division protein kinase 2	L-serine dehydratase		Oxysterols receptor LXR-beta	Bile salt sulfotransferase	Tyrosine-protein phosphatase non-receptor type 1		cAMP-specific 3,5-cyclic phosphodiesterase 4D		Beta-secretase 1	Estrogen-related receptor gamma		Tyrosine-protein phosphatase non-receptor type 1	Peptidyl-prolyl cis-trans isomerase FKBP1A	Farnesyl pyrophosphate synthetase	Glutathione S-transferase A1	Phosphoenolpyruvate carboxykinase, cytosolic [GTP]	Mitogen-activated protein kinase 14	Serine/threonine-protein kinase 6	Tyrosine-protein phosphatase non-receptor type 1	Insulin-like growth factor 1 receptor		Trifunctional purine biosynthetic protein adenosine-3	NONE	Deoxycytidine kinase		Carbonic anhydrase 2	Uridine-cytidine kinase 2	Beta-secretase 1	Serine/threonine-protein kinase Chk1	Uridine-cytidine kinase 2	Aldose reductase	Glutathione S-transferase P		Aldo-keto reductase family 1 member C3	Cell division protein kinase 2
Nitric oxide synthase, inducible	Bifunctional 3-phosphoadenosine 5-phosphosulfate synthetase 1	Uridine 5-monophosphate synthase	Nitric oxide synthase, inducible	Alcohol dehydrogenase class-3	Leukocyte elastase	Protein-glutamine gamma-glutamyltransferase E	Non-secretory ribonuclease		Maleylacetoacetate isomerase	Glutathione S-transferase A1	Glucosamine-6-phosphate isomerase		GTP-binding nuclear protein Ran	Phosphoenolpyruvate carboxykinase, cytosolic [GTP]	Sulfotransferase family cytosolic 2B member 1		Corticosteroid 11-beta-dehydrogenase isozyme 1	Beta-secretase 1	Alpha-tocopherol transfer protein		Branched-chain-amino-acid aminotransferase, mitochondrial		Thyroid hormone receptor beta			Riboflavin kinase	Death-associated protein kinase 1	Proto-oncogene tyrosine-protein kinase LCK	Basic fibroblast growth factor receptor 1	B transferase	Heat shock protein HSP 90-alpha	Mitogen-activated protein kinase 14	Beta-secretase 1	Heat shock protein HSP 90-alpha		Tyrosine-protein kinase BTK	Death-associated protein kinase 1	Proto-oncogene serine/threonine-protein kinase Pim-1		Heat shock protein HSP 90-alpha	Tryptophanyl-tRNA synthetase, cytoplasmic	Mitogen-activated protein kinase 14	Caspase-3	Caspase-3	NONE	Caspase-3		cAMP-specific 3,5-cyclic phosphodiesterase 4B	Cell division protein kinase 2
Neutrophil collagenase	Coagulation factor VII	Cell division protein kinase 2	Neutrophil collagenase	Ribonuclease 4	Heat shock protein homolog SSE1	5(3)-deoxyribonucleotidase, mitochondrial	Serine/threonine-protein kinase 6		Matrix metalloproteinase-9	Protein-glutamine gamma-glutamyltransferase E	Thymidylate kinase		Histo-blood group ABO system transferase	Glucose-6-phosphate isomerase	Proto-oncogene tyrosine-protein kinase Src		SEC14-like protein 2	Hepatocyte nuclear factor 4-gamma	Oxysterols receptor LXR-beta		Retinoic acid receptor RXR-beta		Beta-secretase 1			Glutathione S-transferase Mu 1	Glutathione S-transferase P	3-phosphoinositide-dependent protein kinase 1	Macrophage metalloelastase	Beta-secretase 1	NONE	Tyrosine-protein kinase JAK2	Carbonic anhydrase 2	Renin		Adenosine kinase	Coagulation factor VII	Ras-related protein Rab-5A		GMP reductase 2	NONE	Dihydroorotate dehydrogenase, mitochondrial	cAMP-specific 3,5-cyclic phosphodiesterase 4D	Proto-oncogene tyrosine-protein kinase LCK	Cellular retinoic acid-binding protein 2	Aldose reductase		Aldo-keto reductase family 1 member C3	Proto-oncogene serine/threonine-protein kinase Pim-1
Carbonic anhydrase 2	Pyruvate kinase isozymes R/L	Interferon-stimulated gene 20 kDa protein	Carbonic anhydrase 2	Proto-oncogene tyrosine-protein kinase Src	Glutathione S-transferase P	Antigen peptide transporter 1	Bile salt sulfotransferase		Adenosine kinase	Lysozyme C	Interleukin-2		Tyrosine-protein phosphatase non-receptor type 1	Cyclin-A2	Apoptotic protease-activating factor 1		Retinol-binding protein 4	Serine/threonine-protein phosphatase PP1-gamma catalytic subunit	Sex hormone-binding globulin		Tyrosine-protein phosphatase non-receptor type 1		Cellular retinoic acid-binding protein 2			GTPase HRas	Heat shock protein HSP 90-alpha	5(3)-deoxyribonucleotidase, mitochondrial	NONE	Ornithine aminotransferase, mitochondrial	Androgen receptor	Cathepsin S	Mitogen-activated protein kinase 14	Heat shock protein HSP 90-alpha		Phosphoenolpyruvate carboxykinase, cytosolic [GTP]	Glycogen phosphorylase, liver form	Farnesyl pyrophosphate synthetase		Beta-secretase 1	Galactokinase	NONE	Prothrombin	Leukocyte elastase	Chitotriosidase-1	GTPase HRas		Beta-secretase 1	NONE
S-methyl-5-thioadenosine phosphorylase	Nucleoside diphosphate kinase B	Histidine triad nucleotide-binding protein 1	S-methyl-5-thioadenosine phosphorylase	Glycogen synthase kinase-3 beta	Ras-related protein Rab-5A	Adenine phosphoribosyltransferase	Antigen peptide transporter 1		Histamine N-methyltransferase	Pancreatic alpha-amylase	Glutathione S-transferase P		Uridine-cytidine kinase 2	Inosine-5-monophosphate dehydrogenase 2	Thymidylate kinase		Beta-secretase 1	Retinol-binding protein 4	Retinol-binding protein 4		Glutathione S-transferase P		Retinoic acid receptor RXR-alpha			Glutathione S-transferase A3	Cyclin-A2	Neutrophil collagenase	Inosine-5-monophosphate dehydrogenase 2	Tyrosine-protein phosphatase non-receptor type 1	Mitogen-activated protein kinase 8	Aldo-keto reductase family 1 member C3	Mitogen-activated protein kinase 14	Fatty acid-binding protein, heart		Inositol-trisphosphate 3-kinase A	Cystathionine beta-synthase	Beta-hexosaminidase beta chain		NONE	Glutathione S-transferase P	PMS1 protein homolog 2	Alpha-tocopherol transfer protein	Tyrosine-protein kinase HCK	Trifunctional purine biosynthetic protein adenosine-3	Aldose reductase		cAMP-specific 3,5-cyclic phosphodiesterase 4D	Hepatocyte growth factor receptor
Carbonyl reductase [NADPH] 1	Glycogen synthase kinase-3 beta	Eukaryotic translation initiation factor 4E	Carbonyl reductase [NADPH] 1	Death-associated protein kinase 1	3-phosphoinositide-dependent protein kinase 1	Estrogen sulfotransferase	Tyrosine-protein phosphatase non-receptor type 1		Ras-related protein Rap-2a	Serine/threonine-protein kinase 6	Cell division protein kinase 7		Beta-hexosaminidase beta chain	Tyrosine-protein phosphatase non-receptor type 1	Bile salt sulfotransferase		Retinoic acid receptor beta	Nuclear receptor subfamily 1 group I member 2	Retinoic acid receptor beta		Transthyretin		Carbonic anhydrase 2			Serine/threonine-protein phosphatase PP1-gamma catalytic subunit	Uridine-cytidine kinase 2	Glutathione S-transferase theta-2	ADAM 33	NONE	Androgen receptor	Beta-secretase 1	Tyrosine-protein kinase HCK	Tyrosine-protein phosphatase non-receptor type 1		Glutathione S-transferase P	GTPase HRas	NONE		Beta-secretase 1	Ras-related protein Rap-2a	Caspase-3	Vascular endothelial growth factor receptor 2	Alpha-tocopherol transfer protein	Methionine aminopeptidase 2	Sulfotransferase family cytosolic 2B member 1		Vascular endothelial growth factor receptor 2	Renin
NONE	Sulfotransferase 1A1	Ras-related protein Rap-2a	NONE	L-serine dehydratase	Coagulation factor VII	3 histone mRNA exonuclease 1	Riboflavin kinase		Proto-oncogene tyrosine-protein kinase Src	Proto-oncogene tyrosine-protein kinase Src	Pyruvate kinase isozymes R/L		Tyrosine-protein phosphatase non-receptor type 1	Apoptotic protease-activating factor 1	NONE		Neprilysin	Calmodulin	Mitogen-activated protein kinase 14		Retinoic acid receptor beta		Histone deacetylase 8			Glutathione S-transferase A1	Prothrombin	Histo-blood group ABO system transferase	Cell division protein kinase 2	Prothrombin	Caspase-3	Tryptase beta-2	Bile acid receptor	Leukotriene A-4 hydrolase		Ras-related protein Rab-11A	Early endosome antigen 1	Tyrosine-protein phosphatase non-receptor type 1		Beta-secretase 1	B-Raf proto-oncogene serine/threonine-protein kinase	Glutathione S-transferase A1	Cell division protein kinase 2	NONE	Beta-hexosaminidase beta chain	Glutathione S-transferase A1		Serine/threonine-protein phosphatase PP1-gamma catalytic subunit	Carbonic anhydrase 2
tRNA (cytosine-5-)-methyltransferase	Farnesyl pyrophosphate synthetase	Glutathione S-transferase P	tRNA (cytosine-5-)-methyltransferase	Riboflavin kinase	ADAM 33	ADP-ribosylation factor-like protein 5B	Scavenger mRNA-decapping enzyme DcpS		Glutathione S-transferase P	Activated CDC42 kinase 1	Glycogen synthase kinase-3 beta		Histidine triad nucleotide-binding protein 1	Ras-related protein Rab-5A	Glutathione S-transferase P		Cellular retinoic acid-binding protein 2	Thyroid hormone receptor beta	Retinoic acid receptor gamma		Glutathione S-transferase P		Estrogen receptor beta			Tyrosine-protein kinase BTK	Beta-secretase 1	Renin	3-hydroxy-3-methylglutaryl-coenzyme A reductase	Phosphoenolpyruvate carboxykinase, cytosolic [GTP]	Macrophage metalloelastase	Angiotensin-converting enzyme	Basic fibroblast growth factor receptor 1	Heat shock protein HSP 90-alpha		Hexokinase-1	Pyruvate kinase isozymes R/L	Dihydrofolate reductase		Phosphoenolpyruvate carboxykinase, cytosolic [GTP]	Cell division protein kinase 2	B-Raf proto-oncogene serine/threonine-protein kinase	Neprilysin	Dihydroorotate dehydrogenase, mitochondrial	Proto-oncogene tyrosine-protein kinase LCK	NONE		Histo-blood group ABO system transferase	cAMP-specific 3,5-cyclic phosphodiesterase 4D
Riboflavin kinase	NONE	Riboflavin kinase	Riboflavin kinase	Sepiapterin reductase	Heat shock protein HSP 90-alpha	Cystathionine beta-synthase	NONE		Pyruvate kinase isozymes R/L	Inositol monophosphatase	Thymidylate kinase		GMP reductase 1	Cyclin-A2	Trifunctional purine biosynthetic protein adenosine-3		Methionine aminopeptidase 2	Estrogen-related receptor gamma	Estrogen sulfotransferase		Ras-related protein Rap-2a		Peroxisome proliferator-activated receptor gamma			Coagulation factor VII	Prostatic acid phosphatase	Beta-secretase 1	Tyrosine-protein phosphatase non-receptor type 1	Tyrosine-protein phosphatase non-receptor type 1	Renin	Mitogen-activated protein kinase 14	Cell division protein kinase 2	Leukotriene A-4 hydrolase		Urokinase-type plasminogen activator	RAF proto-oncogene serine/threonine-protein kinase	Estradiol 17-beta-dehydrogenase 1		GMP reductase 1	Renin	Mitogen-activated protein kinase 14	Cell division protein kinase 2	Nuclear receptor subfamily 1 group I member 2	Cell division protein kinase 2	Endothelial protein C receptor		Neprilysin	cAMP-specific 3,5-cyclic phosphodiesterase 4B
NAD-dependent deacetylase sirtuin-5	NAD-dependent malic enzyme, mitochondrial	Adenosine kinase	NAD-dependent deacetylase sirtuin-5	Tyrosine-protein phosphatase non-receptor type 1	Ras-related protein Rap-2a	Tyrosine-protein kinase BTK	Inosine-5-monophosphate dehydrogenase 1		Interleukin-2	Glutathione S-transferase P	Proto-oncogene tyrosine-protein kinase LCK		Early endosome antigen 1	Riboflavin kinase	Nucleoside diphosphate kinase B		Aldo-keto reductase family 1 member C3	Estrogen receptor beta	Methionine aminopeptidase 2		Nicotinamide mononucleotide adenylyltransferase 1		Glutathione S-transferase P			Eukaryotic translation initiation factor 4E	Phosphoenolpyruvate carboxykinase, cytosolic [GTP]	Stromelysin-1	Heat shock protein HSP 90-alpha	Angiotensin-converting enzyme	Tyrosine-protein phosphatase non-receptor type 1	Uridine-cytidine kinase 2	Caspase-3	Tyrosine-protein phosphatase non-receptor type 1		Early endosome antigen 1	Bifunctional purine biosynthesis protein PURH	Cathepsin K		UDP-glucose 4-epimerase	Beta-secretase 1	Tyrosine-protein kinase HCK	B-Raf proto-oncogene serine/threonine-protein kinase	Phosphoenolpyruvate carboxykinase, cytosolic [GTP]	Cell division protein kinase 2	Estradiol 17-beta-dehydrogenase 1		Cell division protein kinase 2	Carbonic anhydrase 2
Mitogen-activated protein kinase 14	Glucose-6-phosphate isomerase	Insulin receptor	Mitogen-activated protein kinase 14	Uridine-cytidine kinase 2	Trifunctional purine biosynthetic protein adenosine-3	Farnesyl pyrophosphate synthetase	Bifunctional 3-phosphoadenosine 5-phosphosulfate synthetase 1		Glutathione S-transferase P	Beta-hexosaminidase subunit beta	Carbonic anhydrase 2		C-type lectin domain family 4 member M	Early endosome antigen 1	Early endosome antigen 1		Cell division protein kinase 2	Oxysterols receptor LXR-beta	Nuclear receptor subfamily 1 group I member 2		Bifunctional heparan sulfate N-deacetylase/N-sulfotransferase 1		Renin			Glutathione S-transferase A1	Serine/threonine-protein kinase 6	3-phosphoinositide-dependent protein kinase 1	Insulin receptor	Insulin receptor	3-hydroxy-3-methylglutaryl-coenzyme A reductase	Angiopoietin-1 receptor	Peptidyl-prolyl cis-trans isomerase FKBP1A	Tyrosine-protein phosphatase non-receptor type 1		Uridine 5-monophosphate synthase	Glutathione S-transferase P	Angiogenin		Transthyretin	Death-associated protein kinase 1	Uridine-cytidine kinase 2	Transthyretin	Cell division protein kinase 2	Glutathione S-transferase A1	Dipeptidase 1		Sex hormone-binding globulin	Tyrosine-protein phosphatase non-receptor type 1
Hypoxanthine-guanine phosphoribosyltransferase	Neprilysin	Death-associated protein kinase 1	Hypoxanthine-guanine phosphoribosyltransferase	Estrogen sulfotransferase	Proto-oncogene tyrosine-protein kinase LCK	Stromelysin-1	Eukaryotic translation initiation factor 4E		Cathepsin K	Glutathione S-transferase P	GMP reductase 2		Cell division protein kinase 2	Tyrosine-protein kinase BTK			Mitogen-activated protein kinase 14	Tyrosine-protein phosphatase non-receptor type 1	Tyrosine-protein phosphatase non-receptor type 1		Trifunctional purine biosynthetic protein adenosine-3		Thyroid hormone receptor beta			Rho-related GTP-binding protein RhoE	Tyrosine-protein phosphatase non-receptor type 1	Cathepsin S	3-hydroxy-3-methylglutaryl-coenzyme A reductase	Nuclear receptor ROR-alpha	Retinoic acid receptor RXR-alpha	Macrophage metalloelastase	Beta-secretase 1	Eukaryotic translation initiation factor 4E		Beta-secretase 1	Angiogenin	GTPase HRas		Lactoylglutathione lyase	Beta-secretase 1	Glutathione S-transferase P	Transthyretin	Serine/threonine-protein kinase Chk1	NONE	Mitogen-activated protein kinase 14		Serine/threonine-protein phosphatase PP1-gamma catalytic subunit	Sex hormone-binding globulin
Cell division protein kinase 2	Bile salt sulfotransferase	Thymidylate kinase	Cell division protein kinase 2	Tyrosine-protein kinase BTK	Histo-blood group ABO system transferase	Cathepsin K	Rho-related GTP-binding protein RhoE		Apoptotic protease-activating factor 1	Pyruvate kinase isozymes R/L	Adenosine kinase		UDP-N-acetylhexosamine pyrophosphorylase	Pyruvate kinase isozymes R/L			Dipeptidase 1	Tyrosine-protein phosphatase non-receptor type 1	Thyroid hormone receptor beta		Glutathione S-transferase P		Glutathione S-transferase P			Spliceosome RNA helicase BAT1	Mitogen-activated protein kinase 1	Suppressor of tumorigenicity protein 14	NONE	Peptidyl-prolyl cis-trans isomerase FKBP1A	Androgen receptor	Proto-oncogene tyrosine-protein kinase Src	cAMP-specific 3,5-cyclic phosphodiesterase 4B	Proto-oncogene tyrosine-protein kinase Src		Beta-secretase 1	Tyrosine-protein phosphatase non-receptor type 1	Beta-secretase 1		Mitogen-activated protein kinase 14	NAD-dependent deacetylase sirtuin-5	Beta-secretase 1	Prothrombin	Transthyretin	Serine/threonine-protein phosphatase PP1-gamma catalytic subunit	Dihydroorotate dehydrogenase, mitochondrial		cAMP-specific 3,5-cyclic phosphodiesterase 4B	Beta-secretase 1
Uridine-cytidine kinase 2	Branched-chain-amino-acid aminotransferase, mitochondrial	Glutathione S-transferase P	Uridine-cytidine kinase 2	Hypoxanthine-guanine phosphoribosyltransferase	Histo-blood group ABO system transferase	NONE	Sulfotransferase family cytosolic 2B member 1		Hypoxanthine-guanine phosphoribosyltransferase	GMP reductase 2	Glucose-6-phosphate 1-dehydrogenase		Tyrosine-protein kinase HCK	Thymidylate kinase			Thyroid hormone receptor beta	Sex hormone-binding globulin	SEC14-like protein 2		NAD-dependent malic enzyme, mitochondrial		Glutathione S-transferase A1			Interstitial collagenase	cAMP-specific 3,5-cyclic phosphodiesterase 4B	Thymidylate kinase	Androgen receptor	NONE	Peptidyl-prolyl cis-trans isomerase FKBP1A	Neutrophil collagenase	cAMP-specific 3,5-cyclic phosphodiesterase 4B	Basic fibroblast growth factor receptor 1		Cell division protein kinase 2	Nicotinamide mononucleotide adenylyltransferase 3	Deoxycytidine kinase		Glycogen phosphorylase, liver form	Serine/threonine-protein kinase Chk1	Endothelial protein C receptor	Cellular retinoic acid-binding protein 2	Vitamin D3 receptor	Leukocyte elastase	Beta-secretase 1		Mitogen-activated protein kinase 14	Cell division protein kinase 2
cGMP-specific 3,5-cyclic phosphodiesterase	Thymidine kinase, cytosolic	Sulfotransferase 1A1	cGMP-specific 3,5-cyclic phosphodiesterase	Proto-oncogene tyrosine-protein kinase Src	GTP-binding nuclear protein Ran	Pyruvate kinase isozymes R/L	Pyruvate kinase isozymes R/L		Matrix metalloproteinase-9	Dual specificity protein kinase CLK1	Tryptophanyl-tRNA synthetase, cytoplasmic		Ras-related protein Rap-2a	Histidine triad nucleotide-binding protein 1			Retinoic acid receptor gamma	Estradiol 17-beta-dehydrogenase 1	Prothrombin		Branched-chain-amino-acid aminotransferase, mitochondrial		Carbonic anhydrase 2			GTPase HRas	Nuclear receptor subfamily 1 group I member 2	3-phosphoinositide-dependent protein kinase 1	Beta-secretase 1	Farnesyl pyrophosphate synthetase	Nuclear receptor subfamily 1 group I member 2	Interleukin-2	Tyrosine-protein phosphatase non-receptor type 1	Cell division protein kinase 2		Beta-secretase 1	Glutathione S-transferase P	Ras-related C3 botulinum toxin substrate 1		Ephrin type-B receptor 4	Inositol monophosphatase	Retinoic acid receptor gamma	Cell division protein kinase 2	Endothelial protein C receptor	5(3)-deoxyribonucleotidase, mitochondrial	Glutathione S-transferase A1		Androgen receptor	Proto-oncogene tyrosine-protein kinase ABL1
cGMP-specific 3,5-cyclic phosphodiesterase	Eukaryotic translation initiation factor 4E	Riboflavin kinase	cGMP-specific 3,5-cyclic phosphodiesterase	Thymidylate kinase	ADP-ribosylation factor-like protein 5B	Coagulation factor VII	Pyruvate kinase isozymes R/L		Platelet glycoprotein Ib alpha chain	Inosine-5-monophosphate dehydrogenase 2	GTPase HRas		Ras-related protein Rab-5A	Hypoxanthine-guanine phosphoribosyltransferase			TGF-beta receptor type-1	Estrogen receptor	Retinoic acid receptor RXR-alpha		Retinoic acid receptor gamma		Retinol-binding protein 4			Glutathione S-transferase Mu 2	Tyrosine-protein kinase HCK	Sulfotransferase family cytosolic 2B member 1	Tryptophanyl-tRNA synthetase, cytoplasmic	Deoxyuridine 5-triphosphate nucleotidohydrolase, mitochondrial	Tyrosine-protein phosphatase non-receptor type 1	Carbonic anhydrase 2	Peptidyl-prolyl cis-trans isomerase FKBP1A	Mitogen-activated protein kinase 14		Ras-related protein Rap-2a	Scavenger mRNA-decapping enzyme DcpS	Ras-related protein Rab-5A		Glutathione S-transferase P	Androgen receptor	B-Raf proto-oncogene serine/threonine-protein kinase	NONE	Prothrombin	Mast/stem cell growth factor receptor	Cellular retinoic acid-binding protein 2		cAMP-dependent protein kinase catalytic subunit alpha	Mitogen-activated protein kinase 14
Prothrombin	Tyrosine-protein kinase BTK	Nucleoside diphosphate kinase B	Prothrombin	Glucose-6-phosphate isomerase	Heat shock protein HSP 90-alpha	NONE	Thymidine kinase, cytosolic		Histo-blood group ABO system transferase	Phosphoenolpyruvate carboxykinase, cytosolic [GTP]	Coagulation factor VII		Ras-related protein Rab-9	Cell division protein kinase 2			Alpha-tocopherol transfer protein	Vascular endothelial growth factor receptor 2	Peptidyl-prolyl cis-trans isomerase FKBP1A		Transthyretin		Retinoic acid receptor RXR-alpha			Neprilysin	Thymidylate kinase	Prothrombin	3-hydroxy-3-methylglutaryl-coenzyme A reductase	Kinesin-like protein KIF11	Bile acid receptor	Cell division protein kinase 2	cAMP-specific 3,5-cyclic phosphodiesterase 4D	Proto-oncogene tyrosine-protein kinase Src		Proto-oncogene tyrosine-protein kinase LCK	Sulfotransferase family cytosolic 2B member 1	Spermidine synthase		GTPase HRas	Riboflavin kinase	Prothrombin	Leukocyte elastase	Mitogen-activated protein kinase 10	Mitogen-activated protein kinase 14	Heat shock protein HSP 90-alpha		Androgen receptor	cAMP-specific 3,5-cyclic phosphodiesterase 4B
Macrophage metalloelastase	Sulfotransferase family cytosolic 2B member 1	Adenine phosphoribosyltransferase	Macrophage metalloelastase	Scavenger mRNA-decapping enzyme DcpS	Thymidylate kinase	Riboflavin kinase	Focal adhesion kinase 1		Riboflavin kinase	Histo-blood group ABO system transferase	Insulin receptor		Bile salt sulfotransferase	C-C motif chemokine 5			Tyrosine-protein phosphatase non-receptor type 1	Estrogen sulfotransferase	Phenylethanolamine N-methyltransferase		Neutrophil gelatinase-associated lipocalin		NONE			Non-secretory ribonuclease	Tyrosine-protein phosphatase non-receptor type 1	Insulin receptor	3-hydroxy-3-methylglutaryl-coenzyme A reductase	Proto-oncogene tyrosine-protein kinase LCK	Mitogen-activated protein kinase 14	Beta-secretase 1	Leukotriene A-4 hydrolase	Glycogen synthase kinase-3 beta		Proto-oncogene serine/threonine-protein kinase Pim-1	Thymidylate kinase	Leukocyte elastase		Hexokinase-1	Adenosine kinase	Proto-oncogene tyrosine-protein kinase LCK	B-Raf proto-oncogene serine/threonine-protein kinase	cAMP-specific 3,5-cyclic phosphodiesterase 4D	3-hydroxy-3-methylglutaryl-coenzyme A reductase	Leukocyte elastase		Glutathione S-transferase P	Androgen receptor
Aldose reductase	GMP reductase 1	Cell division protein kinase 2	Aldose reductase	Serine--pyruvate aminotransferase	S-adenosylmethionine decarboxylase proenzyme	GTPase HRas	Proto-oncogene tyrosine-protein kinase Src		Glutathione S-transferase P	Cathepsin B	FK506-binding protein 3		Ras-related protein Rab-5A	Cell division protein kinase 2			Aldo-keto reductase family 1 member C1	Heat shock protein HSP 90-alpha	Tyrosine-protein phosphatase non-receptor type 1		Nitric oxide synthase, endothelial		Thyroid hormone receptor beta			NONE	NONE	Mitogen-activated protein kinase 14	Tyrosine-protein phosphatase non-receptor type 1	Prothrombin	Beta-secretase 1	Beta-secretase 1	Beta-secretase 1	Tyrosine-protein phosphatase non-receptor type 1		Neprilysin	Glutathione S-transferase P	Apoptotic protease-activating factor 1		Proto-oncogene tyrosine-protein kinase LCK	NONE	Leukocyte elastase	Glutathione S-transferase A1	Glutathione S-transferase A1	Peptidyl-prolyl cis-trans isomerase FKBP1A	Vascular endothelial growth factor receptor 2		Vitamin D3 receptor	Adenosine kinase
Beta-secretase 1	Cystathionine beta-synthase	Tyrosine-protein phosphatase non-receptor type 1	Beta-secretase 1	Nucleoside diphosphate kinase B	Activated CDC42 kinase 1	Riboflavin kinase	Mitogen-activated protein kinase 10		Glutathione S-transferase A1	Riboflavin kinase	Histone-lysine N-methyltransferase, H3 lysine-79 specific		Histidine triad nucleotide-binding protein 1	Estrogen sulfotransferase			Glucocorticoid receptor	Vitamin D3 receptor	Amine oxidase [flavin-containing] B		Proto-oncogene tyrosine-protein kinase Src		NONE			Early endosome antigen 1	MAP kinase-activated protein kinase 2	Beta-secretase 1	cAMP-specific 3,5-cyclic phosphodiesterase 4B	Sulfotransferase family cytosolic 2B member 1	Serine/threonine-protein phosphatase PP1-gamma catalytic subunit	Stromelysin-1	cGMP-specific 3,5-cyclic phosphodiesterase	Beta-secretase 1		GTPase HRas	Glucose-6-phosphate isomerase	Uridine-cytidine kinase 2		B-Raf proto-oncogene serine/threonine-protein kinase	Coagulation factor VII	Neprilysin	Cathepsin K	Leukocyte elastase	Dipeptidyl peptidase 4	Cathepsin K		Uridine-cytidine kinase 2	Serine/threonine-protein kinase Chk1
Histamine N-methyltransferase	E-selectin	Amine oxidase [flavin-containing] B	Histamine N-methyltransferase	NAD-dependent malic enzyme, mitochondrial	Death-associated protein kinase 1	Alcohol dehydrogenase class-3	Riboflavin kinase		GMP reductase 2	Tryptophanyl-tRNA synthetase, cytoplasmic	Glycogen phosphorylase, liver form		NAD-dependent deacetylase sirtuin-5	Aldose reductase			Peptidyl-prolyl cis-trans isomerase FKBP1A	Estrogen-related receptor gamma	Estrogen-related receptor gamma		Cell division protein kinase 7		3-hydroxy-3-methylglutaryl-coenzyme A reductase			Aldo-keto reductase family 1 member C3	Tyrosine-protein phosphatase non-receptor type 1	Basic fibroblast growth factor receptor 1	Angiopoietin-1 receptor	Tyrosine-protein phosphatase non-receptor type 1	Tyrosine-protein phosphatase non-receptor type 1	Prothrombin	Peptidyl-prolyl cis-trans isomerase FKBP1A	Cell division protein kinase 2		Ras-related C3 botulinum toxin substrate 1	Death-associated protein kinase 1	Endoplasmic reticulum mannosyl-oligosaccharide 1,2-alpha-mannosidase		Neprilysin	Caspase-3	cAMP-specific 3,5-cyclic phosphodiesterase 4D	Beta-secretase 1	Neprilysin	Leukocyte elastase	Transthyretin		Insulin receptor	Glucose-6-phosphate isomerase
Nitric oxide synthase, inducible	Inosine-5-monophosphate dehydrogenase 2	Uridine-cytidine kinase 2	Nitric oxide synthase, inducible	Non-secretory ribonuclease	Pyruvate kinase isozymes R/L	Non-secretory ribonuclease	L-serine dehydratase		Tyrosine-protein kinase BTK	Riboflavin kinase	Neprilysin		Angiogenin	Phenylethanolamine N-methyltransferase			Estrogen sulfotransferase	Vascular endothelial growth factor receptor 2	Estrogen receptor		Glycine amidinotransferase, mitochondrial		Thyroid hormone receptor beta-2			Lysozyme C	Prothrombin	Aldose reductase	Tyrosine-protein phosphatase non-receptor type 1	Peroxisome proliferator-activated receptor alpha	Mitogen-activated protein kinase 14	Cathepsin G	Carbonic anhydrase 2	Arginase-1		Prothrombin	Bifunctional 3-phosphoadenosine 5-phosphosulfate synthetase 1	Glutathione S-transferase theta-2		Tyrosine-protein phosphatase non-receptor type 1	UDP-N-acetylhexosamine pyrophosphorylase	Cell division protein kinase 2	Prothrombin	Vascular endothelial growth factor receptor 2	Neutrophil collagenase	Beta-secretase 1		Carbonic anhydrase 2	Estrogen receptor
Neutrophil collagenase	Ras-related C3 botulinum toxin substrate 1	Amine oxidase [flavin-containing] B	Neutrophil collagenase	3 histone mRNA exonuclease 1	NAD-dependent deacetylase sirtuin-5	Thymidylate kinase	Cystathionine beta-synthase		Beta-secretase 1	Cell division protein kinase 2	cAMP-specific 3,5-cyclic phosphodiesterase 4D		Nitric oxide synthase, inducible	Farnesyl pyrophosphate synthetase			Sex hormone-binding globulin	Cyclin-A2	Estrogen receptor		Proto-oncogene tyrosine-protein kinase Src		Retinoic acid receptor RXR-alpha			Macrophage metalloelastase	Tyrosine-protein phosphatase non-receptor type 1	Prothrombin	Lactoylglutathione lyase	Beta-secretase 1	Angiopoietin-1 receptor	Serum albumin	NONE	Thymidylate kinase		Thymidylate kinase	Alcohol dehydrogenase class-3	Hypoxanthine-guanine phosphoribosyltransferase		Glucokinase	Mitogen-activated protein kinase 14	Dual specificity mitogen-activated protein kinase kinase 1	Vitamin D3 receptor	Vascular endothelial growth factor receptor 2	Beta-secretase 1	Mitogen-activated protein kinase 10		TGF-beta receptor type-1	Basic fibroblast growth factor receptor 1
Prothrombin	Non-secretory ribonuclease	Phosphoenolpyruvate carboxykinase, cytosolic [GTP]	Prothrombin	Ras-related C3 botulinum toxin substrate 1	NONE	Thymidylate kinase	Non-secretory ribonuclease		Nitric oxide synthase, inducible	Glutathione S-transferase P	Proto-oncogene tyrosine-protein kinase Src		Histone-lysine N-methyltransferase, H3 lysine-79 specific	Bifunctional purine biosynthesis protein PURH			SEC14-like protein 2	Estrogen receptor	Hepatocyte growth factor receptor		Glycogen phosphorylase, liver form		Thyroid hormone receptor beta			Neutrophil collagenase	Serine/threonine-protein kinase 6	Tryptase beta-2	Chymase	Beta-secretase 1	Beta-hexosaminidase beta chain	Nuclear receptor subfamily 1 group I member 2	3-hydroxy-3-methylglutaryl-coenzyme A reductase	Farnesyl pyrophosphate synthetase		Endoplasmic reticulum mannosyl-oligosaccharide 1,2-alpha-mannosidase	Rho GTPase-activating protein 1	Matrix metalloproteinase-16		Non-secretory ribonuclease	Beta-secretase 1	Transthyretin	Heat shock protein HSP 90-alpha	Dipeptidase 1	Cyclin-A2	Vitamin D3 receptor		Carbonic anhydrase 2	TGF-beta receptor type-1
Carbonic anhydrase 12	Tyrosine-protein phosphatase non-receptor type 1	Thymidylate kinase	Carbonic anhydrase 12	Proto-oncogene tyrosine-protein kinase Src	cAMP-dependent protein kinase catalytic subunit alpha	6-phosphofructo-2-kinase/fructose-2,6-biphosphatase 1	Nucleoside diphosphate kinase B		cAMP-specific 3,5-cyclic phosphodiesterase 4B	NAD-dependent deacetylase sirtuin-5	Glycogen synthase kinase-3 beta		Dihydroorotate dehydrogenase, mitochondrial	Carbonic anhydrase 2			Nuclear receptor subfamily 1 group I member 2	Estrogen receptor	Ferrochelatase, mitochondrial		Proto-oncogene tyrosine-protein kinase Src		Dihydroorotate dehydrogenase, mitochondrial			Macrophage metalloelastase	3-hydroxy-3-methylglutaryl-coenzyme A reductase	Beta-secretase 1	Tyrosine-protein phosphatase non-receptor type 1	6-phosphofructo-2-kinase/fructose-2,6-biphosphatase 1	B-Raf proto-oncogene serine/threonine-protein kinase	Beta-secretase 1	Glycogen synthase kinase-3 beta	L-serine dehydratase		Bile salt sulfotransferase	Glutathione S-transferase P	Tyrosine-protein phosphatase non-receptor type 1		Thymidylate kinase	Neutrophil collagenase	Transthyretin	Eukaryotic translation initiation factor 4E	Cellular retinoic acid-binding protein 2	Aldose reductase	Alpha-tocopherol transfer protein		Mitogen-activated protein kinase 14	Tyrosine-protein phosphatase non-receptor type 1
Cathepsin S	Pyruvate kinase isozymes R/L	Non-secretory ribonuclease	Cathepsin S	Spliceosome RNA helicase BAT1	Glutathione S-transferase A1	Amine oxidase [flavin-containing] B	Thymidylate kinase		Fibrinogen gamma chain	Glycogen synthase kinase-3 beta	Glucose-6-phosphate isomerase		Methionine aminopeptidase 1	Cell division protein kinase 2			Estrogen-related receptor gamma	Phenylethanolamine N-methyltransferase	Histo-blood group ABO system transferase		ADP-ribosylation factor-like protein 5A		Prothrombin			Beta-secretase 1	Proto-oncogene tyrosine-protein kinase Src	cGMP-specific 3,5-cyclic phosphodiesterase	3-hydroxy-3-methylglutaryl-coenzyme A reductase	Cell division protein kinase 2	Coagulation factor XI	Tyrosine-protein kinase HCK	Heat shock protein HSP 90-alpha	Cathepsin S		Beta-secretase 1	Mitogen-activated protein kinase 10	Tryptophanyl-tRNA synthetase, cytoplasmic		Aldose reductase	Carbonic anhydrase 2	Estrogen receptor	Dual specificity mitogen-activated protein kinase kinase 1	B-Raf proto-oncogene serine/threonine-protein kinase	Proto-oncogene tyrosine-protein kinase ABL1	Neprilysin		NONE	Progesterone receptor
Beta-secretase 1	NONE	GTPase HRas	Beta-secretase 1	Uridine-cytidine kinase 2	Tryptophan 5-hydroxylase 1	Heat shock protein HSP 90-alpha	Tyrosine-protein phosphatase non-receptor type 1		Scavenger mRNA-decapping enzyme DcpS	Glutathione S-transferase A1	Ras-related C3 botulinum toxin substrate 1		Cathepsin K	Cell division protein kinase 2			Estrogen receptor	Growth factor receptor-bound protein 2	cAMP-specific 3,5-cyclic phosphodiesterase 4B		Glutathione S-transferase P		3-hydroxy-3-methylglutaryl-coenzyme A reductase			Serum albumin	Tyrosine-protein kinase JAK2	Glutathione S-transferase Mu 2	Beta-secretase 1	Glutathione S-transferase Mu 2	ADAM 33	Cathepsin B	cGMP-specific 3,5-cyclic phosphodiesterase	Cell division protein kinase 2		Inosine-5-monophosphate dehydrogenase 2	Deoxyuridine 5-triphosphate nucleotidohydrolase, mitochondrial	Matrix metalloproteinase-9		Hexokinase-1	Aldose reductase	Beta-secretase 1	Heat shock protein HSP 90-alpha	Transthyretin	Glutathione-requiring prostaglandin D synthase	Cellular retinoic acid-binding protein 2		Glutathione S-transferase P	Neprilysin
Tyrosine-protein phosphatase non-receptor type 1	cAMP-specific 3,5-cyclic phosphodiesterase 4D	GTPase HRas	Tyrosine-protein phosphatase non-receptor type 1	Uridine-cytidine kinase 2	Leukocyte elastase	Thymidine kinase, cytosolic	Farnesyl pyrophosphate synthetase		Cell division protein kinase 2	Nucleoside diphosphate kinase B	E-selectin		Thymidylate kinase	Neprilysin			Estrogen receptor	Hepatocyte growth factor receptor	Estrogen receptor		Ornithine carbamoyltransferase, mitochondrial		Vitamin D3 receptor			Stromelysin-1	cAMP-specific 3,5-cyclic phosphodiesterase 4B	Beta-secretase 1	Serum albumin	Glutathione-requiring prostaglandin D synthase	Angiopoietin-1 receptor	Mitogen-activated protein kinase 14	Nuclear receptor subfamily 1 group I member 2	Stromelysin-1		Beta-hexosaminidase beta chain	Kinesin-like protein KIF11	Ras-related protein Rab-5A		Serine/threonine-protein kinase Chk1	Beta-secretase 1	Dipeptidyl peptidase 4	Macrophage metalloelastase	Leukocyte elastase	Inositol monophosphatase	cAMP-specific 3,5-cyclic phosphodiesterase 4D		Beta-secretase 1	Ornithine aminotransferase, mitochondrial
Cell division protein kinase 2	L-serine dehydratase	Farnesyl pyrophosphate synthetase	Cell division protein kinase 2	GTPase HRas	Aldose reductase	Proto-oncogene tyrosine-protein kinase LCK	Alcohol dehydrogenase class-3		ADP-ribosyl cyclase 2	GMP reductase 1	Cathepsin B		Stromelysin-1	Cell division protein kinase 2			Stromelysin-1	cAMP-dependent protein kinase catalytic subunit alpha	cAMP-dependent protein kinase catalytic subunit alpha		Pyruvate kinase isozymes R/L					Cell division control protein 42 homolog	Glutathione S-transferase A1	Prothrombin	Histidine triad nucleotide-binding protein 1	Retinoic acid receptor RXR-beta	Androgen receptor	Prothrombin	Peroxisome proliferator-activated receptor gamma	Proto-oncogene tyrosine-protein kinase Src		Coagulation factor VII	Proto-oncogene tyrosine-protein kinase Src	Ras-related protein Rap-2a		Sulfotransferase 1A1	Aldose reductase	Nuclear receptor subfamily 1 group I member 2	Methionine aminopeptidase 2	Vascular endothelial growth factor receptor 2	Beta-secretase 1	Isovaleryl-CoA dehydrogenase, mitochondrial		Sex hormone-binding globulin	Coagulation factor XI
Maleylacetoacetate isomerase	Proto-oncogene serine/threonine-protein kinase Pim-1	Amine oxidase [flavin-containing] B	Maleylacetoacetate isomerase	Non-secretory ribonuclease	Death-associated protein kinase 1	Ras-related protein Rab-5A	Coagulation factor VII		Galectin-7	Neutrophil collagenase	Uridine-cytidine kinase 2		NONE	Peptidyl-prolyl cis-trans isomerase FKBP1A			Phenylethanolamine N-methyltransferase	cAMP-specific 3,5-cyclic phosphodiesterase 4B	Tyrosine-protein phosphatase non-receptor type 1		cAMP-specific 3,5-cyclic phosphodiesterase 4B					GTPase HRas	Nuclear receptor subfamily 1 group I member 2	Heat shock protein HSP 90-alpha	Prothrombin	Aldose reductase	Tyrosine-protein phosphatase non-receptor type 1	Prothrombin	Histamine N-methyltransferase	Thymidylate kinase		GTPase HRas	Inosine-5-monophosphate dehydrogenase 1	Sepiapterin reductase		Dihydroorotate dehydrogenase, mitochondrial	Inositol monophosphatase	Carbonic anhydrase 2	Isovaleryl-CoA dehydrogenase, mitochondrial	Cell division protein kinase 2	Baculoviral IAP repeat-containing protein 7	Tyrosine-protein kinase HCK		NONE	Androgen receptor
NONE	Uridine-cytidine kinase 2	Dihydrofolate reductase	NONE	Tyrosine-protein phosphatase non-receptor type 1	Ras-related protein Rab-5A	Basic fibroblast growth factor receptor 1	Branched-chain-amino-acid aminotransferase, mitochondrial		Riboflavin kinase	Fibrinogen gamma chain	Histidine triad nucleotide-binding protein 1		Adenosine kinase	Carbonic anhydrase 2			Gastrotropin	Histo-blood group ABO system transferase	Corticosteroid 11-beta-dehydrogenase isozyme 1		Retinoic acid receptor gamma					Tyrosine-protein phosphatase non-receptor type 1	Protein kinase C theta type	Prothrombin	Estrogen-related receptor gamma	Beta-secretase 1	Serum albumin	Cell division protein kinase 2	NAD(P)H dehydrogenase [quinone] 1	Heat shock protein HSP 90-alpha		Thymidine kinase, cytosolic	Dihydrofolate reductase	Cell division protein kinase 2		Tyrosine-protein kinase BTK	Antigen peptide transporter 1	Farnesyl pyrophosphate synthetase	Protein-arginine deiminase type-4	Dual specificity mitogen-activated protein kinase kinase 1	Leukocyte elastase	Vascular endothelial growth factor receptor 2		Androgen receptor	NONE
Beta-secretase 1	Rho-related GTP-binding protein RhoE	Trifunctional purine biosynthetic protein adenosine-3	Beta-secretase 1	Branched-chain-amino-acid aminotransferase, mitochondrial	Glutathione S-transferase P	Uridine 5-monophosphate synthase	Farnesyl pyrophosphate synthetase		Cyclin-A2	Methionine aminopeptidase 2	Farnesyl pyrophosphate synthetase		Caspase-1	Pyruvate kinase isozymes R/L			Dihydroorotate dehydrogenase, mitochondrial	cAMP-dependent protein kinase catalytic subunit alpha	Cell division protein kinase 2		Antigen peptide transporter 1					Bile salt sulfotransferase	Serum albumin	Lactoylglutathione lyase	Cyclin-A2	Fatty acid-binding protein, heart	NONE	Carbonic anhydrase 2	Mitogen-activated protein kinase 8	cAMP-specific 3,5-cyclic phosphodiesterase 4B		Ribonuclease 4	Proto-oncogene tyrosine-protein kinase Src	Galactokinase		Coagulation factor VII	Aldose reductase	Vascular endothelial growth factor receptor 2	Angiopoietin-1 receptor	Beta-secretase 1	Corticosteroid 11-beta-dehydrogenase isozyme 1	Mitogen-activated protein kinase 14		Tyrosine-protein phosphatase non-receptor type 1	Mitogen-activated protein kinase 14
Phenylethanolamine N-methyltransferase	Carboxypeptidase B	Thymidylate kinase	Phenylethanolamine N-methyltransferase	Carboxypeptidase B	Hexokinase-1	Cathepsin K	Neprilysin		Phenylalanine-4-hydroxylase	Endoplasmic reticulum mannosyl-oligosaccharide 1,2-alpha-mannosidase	Histidine triad nucleotide-binding protein 1		Beta-secretase 1	Inosine-5-monophosphate dehydrogenase 2			Sex hormone-binding globulin	Estrogen receptor	Beta-secretase 1		Lactoylglutathione lyase					Serum albumin	Chymase	Proto-oncogene tyrosine-protein kinase Src	Tyrosine-protein phosphatase non-receptor type 1	Caspase-1	cAMP-specific 3,5-cyclic phosphodiesterase 4B	Proto-oncogene tyrosine-protein kinase LCK	Beta-secretase 1	Glutathione S-transferase P		Ras-related protein Rab-5A	Thymidylate kinase	Matrix metalloproteinase-9		Transthyretin	Mitogen-activated protein kinase 14	Histone-lysine N-methyltransferase, H3 lysine-79 specific	Serine/threonine-protein phosphatase PP1-gamma catalytic subunit	Beta-secretase 1	Hydroxyacyl-coenzyme A dehydrogenase, mitochondrial	Hepatocyte growth factor receptor		Glutathione S-transferase P	Sex hormone-binding globulin
Ras-related protein Rap-2a	MAP kinase-activated protein kinase 2	Sepiapterin reductase	Ras-related protein Rap-2a	Inositol monophosphatase	Peptidyl-prolyl cis-trans isomerase FKBP1A	3-phosphoinositide-dependent protein kinase 1	Thymidylate kinase		Activated CDC42 kinase 1	GTPase HRas	GMP reductase 1		Proto-oncogene tyrosine-protein kinase LCK	Cell division protein kinase 2			3-hydroxy-3-methylglutaryl-coenzyme A reductase	Corticosteroid 11-beta-dehydrogenase isozyme 1	Bile salt sulfotransferase		Lysozyme C					Glutathione S-transferase P	3-hydroxy-3-methylglutaryl-coenzyme A reductase	Heat shock protein HSP 90-alpha	Serine/threonine-protein kinase Chk1	Riboflavin kinase	Transforming growth factor beta-2	Chymase	Carbonic anhydrase 2	Caspase-3		Isovaleryl-CoA dehydrogenase, mitochondrial	Branched-chain-amino-acid aminotransferase, mitochondrial	Heat shock protein HSP 90-alpha		Nucleoside diphosphate kinase B	Glucose-6-phosphate isomerase	Androgen receptor	Beta-secretase 1	SEC14-like protein 2	Beta-secretase 1	Cell division protein kinase 2		Serine/threonine-protein phosphatase PP1-gamma catalytic subunit	Dihydroorotate dehydrogenase, mitochondrial
Glutathione S-transferase P	Angiogenin	L-serine dehydratase	Glutathione S-transferase P	Serum albumin	Beta-secretase 1	ADP-ribosyl cyclase 2	Mitogen-activated protein kinase 10		S-methyl-5-thioadenosine phosphorylase	Bifunctional purine biosynthesis protein PURH	Hypoxanthine-guanine phosphoribosyltransferase		Beta-secretase 1	Proto-oncogene serine/threonine-protein kinase Pim-1			3-hydroxy-3-methylglutaryl-coenzyme A reductase	Beta-secretase 1	Retinoic acid receptor gamma		Fibrinogen gamma chain					ADP-ribosylation factor-like protein 5A	Carbonic anhydrase 2	Coagulation factor XI	3-hydroxy-3-methylglutaryl-coenzyme A reductase	L-lactate dehydrogenase B chain	Heat shock protein HSP 90-alpha	Androgen receptor	Tyrosine-protein kinase SYK	3-hydroxy-3-methylglutaryl-coenzyme A reductase		Glutathione S-transferase P	Trifunctional purine biosynthetic protein adenosine-3	Bile salt sulfotransferase		Mitogen-activated protein kinase 10	Proto-oncogene tyrosine-protein kinase LCK	Heat shock protein HSP 90-alpha	Beta-secretase 1	Beta-secretase 1	Neprilysin	NONE		Amine oxidase [flavin-containing] B	Glycogen synthase kinase-3 beta
Heat shock protein HSP 90-alpha	ADP-ribosylation factor-like protein 5B	Bifunctional heparan sulfate N-deacetylase/N-sulfotransferase 1	Heat shock protein HSP 90-alpha	Aldose reductase	Beta-secretase 1	Thymidine kinase, cytosolic	Tyrosine-protein phosphatase non-receptor type 1		Farnesyl pyrophosphate synthetase	Glutathione S-transferase Mu 1	GTP-binding nuclear protein Ran		Deoxyuridine 5-triphosphate nucleotidohydrolase, mitochondrial	Peptidyl-prolyl cis-trans isomerase FKBP1A			Hepatocyte growth factor receptor	Retinoic acid receptor gamma	Retinoic acid receptor RXR-alpha		Carbonic anhydrase 2					Bifunctional purine biosynthesis protein PURH	Cathepsin G	Tyrosine-protein phosphatase non-receptor type 1	Matrix metalloproteinase-16	NONE	Beta-secretase 1	Androgen receptor	Transthyretin	Fibroblast growth factor receptor 2		3 histone mRNA exonuclease 1	5(3)-deoxyribonucleotidase, mitochondrial	Alcohol dehydrogenase class-3		ADP-ribosylation factor-like protein 5A	Vascular endothelial growth factor receptor 2	Adenylate kinase isoenzyme 1	Tyrosine-protein kinase HCK	Cell division protein kinase 2	Transthyretin	Vascular endothelial growth factor receptor 2		cAMP-dependent protein kinase catalytic subunit alpha	NONE
Eukaryotic translation initiation factor 4E	Proto-oncogene tyrosine-protein kinase Src	Glutathione S-transferase Mu 2	Eukaryotic translation initiation factor 4E	Sulfotransferase family cytosolic 2B member 1	Glutathione S-transferase Mu 2	Amine oxidase [flavin-containing] B	Lysozyme C		Interferon-stimulated gene 20 kDa protein	Branched-chain-amino-acid aminotransferase, mitochondrial	Ephrin type-A receptor 2		Coagulation factor VII	Cell division protein kinase 2			Collagenase 3	Nuclear receptor ROR-alpha	Cyclin-A2		NONE					Serum albumin	Mitogen-activated protein kinase 14	Cathepsin K	Kinesin-like protein KIF11	Serine/threonine-protein kinase PAK 6	3-hydroxy-3-methylglutaryl-coenzyme A reductase	Bcl-2-like protein 1	Peroxisome proliferator-activated receptor alpha	3-hydroxy-3-methylglutaryl-coenzyme A reductase		Pyruvate kinase isozymes R/L	3 histone mRNA exonuclease 1	Histo-blood group ABO system transferase		Rho-related GTP-binding protein RhoE	Hypoxanthine-guanine phosphoribosyltransferase	B-Raf proto-oncogene serine/threonine-protein kinase	Sulfotransferase 1A1	Cell division protein kinase 2	Vitamin D3 receptor	Glutathione S-transferase P		[Pyruvate dehydrogenase [lipoamide]] kinase isozyme 2, mitochondrial	cAMP-specific 3,5-cyclic phosphodiesterase 4B
Glutathione S-transferase P	Phosphoenolpyruvate carboxykinase, cytosolic [GTP]	Aldose reductase	Glutathione S-transferase P	ADP-ribosylation factor 4	Vitamin D3 receptor	Uridine 5-monophosphate synthase	ADP-ribosylation factor-like protein 5A		Mast/stem cell growth factor receptor	Phosphoenolpyruvate carboxykinase, cytosolic [GTP]	Inosine-5-monophosphate dehydrogenase 2		Endoplasmic reticulum mannosyl-oligosaccharide 1,2-alpha-mannosidase	Adenine phosphoribosyltransferase			Cyclin-A2	Wiskott-Aldrich syndrome protein	Estradiol 17-beta-dehydrogenase 1		Tyrosine-protein phosphatase non-receptor type 1					ADAM 33	Proto-oncogene tyrosine-protein kinase LCK	Tyrosine-protein phosphatase non-receptor type 1	NONE	Protein-glutamine gamma-glutamyltransferase E	3-hydroxy-3-methylglutaryl-coenzyme A reductase	Androgen receptor	Alpha-tocopherol transfer protein	Serine/threonine-protein phosphatase PP1-gamma catalytic subunit		GTPase HRas	Heat shock protein HSP 90-alpha	Thymidylate kinase		Dual specificity mitogen-activated protein kinase kinase 1	Angiopoietin-1 receptor	Cellular retinoic acid-binding protein 2	Beta-secretase 1	Farnesyl pyrophosphate synthetase	Proto-oncogene tyrosine-protein kinase LCK	Vascular endothelial growth factor receptor 2		Neutrophil collagenase	MAP kinase-activated protein kinase 2
Beta-secretase 1	Inositol monophosphatase	Spliceosome RNA helicase BAT1	Beta-secretase 1	Insulin receptor	Histidine triad nucleotide-binding protein 1	Spliceosome RNA helicase BAT1	ADP-ribosylation factor-like protein 5B		GTPase HRas	Apoptotic protease-activating factor 1	Neutrophil gelatinase-associated lipocalin		Tyrosine-protein phosphatase non-receptor type 1	Thymidylate kinase			Sex hormone-binding globulin	Retinoic acid receptor RXR-alpha	Oxysterols receptor LXR-beta		Triggering receptor expressed on myeloid cells 1					6-phosphofructo-2-kinase/fructose-2,6-biphosphatase 1	Tyrosine-protein kinase ZAP-70	Cathepsin G	Serine/threonine-protein kinase PAK 6	Tyrosine-protein phosphatase non-receptor type 1	Collagenase 3	Carbonic anhydrase 2	Renin	Glutathione S-transferase P		Ras-related protein Rab-5A	GTPase HRas	Inosine-5-monophosphate dehydrogenase 2		Glycogen phosphorylase, liver form	Vitamin D3 receptor	Insulin receptor	Mitogen-activated protein kinase 14	Heat shock protein HSP 90-alpha	Protein-arginine deiminase type-4	NONE		Glutathione S-transferase P	Aldo-keto reductase family 1 member C2
Protein-glutamine gamma-glutamyltransferase E	Stromelysin-1	Uridine 5-monophosphate synthase	Protein-glutamine gamma-glutamyltransferase E	Eukaryotic translation initiation factor 4E	Histo-blood group ABO system transferase	Amine oxidase [flavin-containing] B	Aldose reductase		Histo-blood group ABO system transferase	Thymidylate kinase	GTPase HRas		Histo-blood group ABO system transferase	ADP-ribosyl cyclase 2			Protein-glutamine gamma-glutamyltransferase E	Dihydroorotate dehydrogenase, mitochondrial	Estrogen receptor		Cystathionine beta-synthase					Tyrosine-protein phosphatase non-receptor type 1	Epidermal growth factor receptor	Glutathione S-transferase P	cAMP-specific 3,5-cyclic phosphodiesterase 4D	Beta-hexosaminidase beta chain	Thyroid hormone receptor beta-2	Ferrochelatase, mitochondrial	Transthyretin	Lactoylglutathione lyase		Glutathione S-transferase P	Sulfotransferase family cytosolic 2B member 1	Early endosome antigen 1		Vascular endothelial growth factor receptor 2	Eukaryotic translation initiation factor 4E	Leukocyte elastase	Interstitial collagenase	Methionine aminopeptidase 2	Endothelial protein C receptor	Carbonic anhydrase 2		Carbonic anhydrase 2	Androgen receptor
Prothrombin	Sulfotransferase family cytosolic 2B member 1	Neprilysin	Prothrombin	Aldo-keto reductase family 1 member C2	Beta-secretase 1	Ras-related protein Rab-5A	Serine/threonine-protein kinase PAK 6		Glucosamine-6-phosphate isomerase	Ras-related protein Rab-5A	Glucose-6-phosphate isomerase			Protein-glutamine gamma-glutamyltransferase E			Histo-blood group ABO system transferase	Alpha-tocopherol transfer protein	Prothrombin		Eukaryotic translation initiation factor 4E					Hydroxyacyl-coenzyme A dehydrogenase, mitochondrial	Serine/threonine-protein phosphatase PP1-gamma catalytic subunit	Bile acid receptor	Uridine 5-monophosphate synthase	GMP reductase 1	Serum albumin	Androgen receptor	Progesterone receptor	NONE		Inosine-5-monophosphate dehydrogenase 1	Spliceosome RNA helicase BAT1	Adenosine kinase		Proto-oncogene tyrosine-protein kinase Src	Histone deacetylase 8	Protein-arginine deiminase type-4	Glutathione-requiring prostaglandin D synthase	Protein-arginine deiminase type-4	GTPase HRas	Serum albumin		Hepatocyte growth factor receptor	Retinoic acid receptor RXR-alpha
Cathepsin F	GTPase HRas	Tyrosine-protein kinase BTK	Cathepsin F	Bifunctional 3-phosphoadenosine 5-phosphosulfate synthetase 1	Heat shock protein HSP 90-alpha	Uridine 5-monophosphate synthase	Dihydrofolate reductase		Histo-blood group ABO system transferase	Sulfotransferase 1A1	Histamine N-methyltransferase			Phosphoenolpyruvate carboxykinase, cytosolic [GTP]			cAMP-specific 3,5-cyclic phosphodiesterase 4B	Retinoic acid receptor RXR-alpha	Histo-blood group ABO system transferase		Proto-oncogene tyrosine-protein kinase Src					E-selectin	Prothrombin	Fibrinogen gamma chain	Glutathione S-transferase P	Rho-related GTP-binding protein RhoE	Peptidyl-prolyl cis-trans isomerase FKBP1A	Prothrombin	3-hydroxy-3-methylglutaryl-coenzyme A reductase	Aldose reductase		Adenosylhomocysteinase	Neprilysin	Macrophage metalloelastase		Caspase-3	Cell division protein kinase 2	Glutathione-requiring prostaglandin D synthase	Mitogen-activated protein kinase 10	Proto-oncogene tyrosine-protein kinase ABL1	Heat shock protein HSP 90-alpha	Vascular endothelial growth factor receptor 2		Mitogen-activated protein kinase 14	Vitamin D3 receptor
3-phosphoinositide-dependent protein kinase 1	Proto-oncogene tyrosine-protein kinase Src	Proto-oncogene tyrosine-protein kinase Src	3-phosphoinositide-dependent protein kinase 1	Complement component C8 gamma chain	Tyrosine-protein phosphatase non-receptor type 1	Heat shock protein HSP 90-alpha	Cyclin-A2		Mitogen-activated protein kinase 10	Endoplasmic reticulum mannosyl-oligosaccharide 1,2-alpha-mannosidase	Serine/threonine-protein kinase 6			ADP-ribosyl cyclase 2			Histo-blood group ABO system transferase	Tyrosine-protein phosphatase non-receptor type 1	Protein-glutamine gamma-glutamyltransferase E		Stromelysin-1					Beta-secretase 1	S-methyl-5-thioadenosine phosphorylase	Neutrophil gelatinase-associated lipocalin	Fatty acid-binding protein, heart	Cell division control protein 42 homolog	Cell division protein kinase 2	Dihydroorotate dehydrogenase, mitochondrial	Retinoic acid receptor RXR-alpha	Aldose reductase		Thymidylate kinase	Mitogen-activated protein kinase 10	Mitogen-activated protein kinase 14		Mitogen-activated protein kinase 14	Uridine-cytidine kinase 2	Serum albumin	Nuclear receptor subfamily 1 group I member 2	B-Raf proto-oncogene serine/threonine-protein kinase	Alpha-tocopherol transfer protein	Insulin receptor		Proto-oncogene tyrosine-protein kinase LCK	Prothrombin
Eukaryotic translation initiation factor 4E	Alcohol dehydrogenase class-3	Inositol monophosphatase	Eukaryotic translation initiation factor 4E	Bifunctional purine biosynthesis protein PURH	cAMP-dependent protein kinase catalytic subunit alpha	Riboflavin kinase	Cell division control protein 42 homolog		GMP reductase 1	Phosphoenolpyruvate carboxykinase, cytosolic [GTP]	NONE			Betaine--homocysteine S-methyltransferase 1			cAMP-dependent protein kinase catalytic subunit alpha	Carbonic anhydrase 2	Vitamin D3 receptor		Early endosome antigen 1					Prostatic acid phosphatase	Prostatic acid phosphatase	Carbonic anhydrase 2	6-phosphofructo-2-kinase/fructose-2,6-biphosphatase 1	Phosphoenolpyruvate carboxykinase, cytosolic [GTP]	Aldo-keto reductase family 1 member C3	Heat shock protein HSP 90-alpha	Retinoic acid receptor RXR-beta	Heat shock protein HSP 90-alpha		Glucosylceramidase	Cell division control protein 42 homolog	ADAM 33		Phospholipase A2, membrane associated	Early endosome antigen 1	Cell division protein kinase 2	Serine/threonine-protein phosphatase PP1-gamma catalytic subunit	Coagulation factor X	Glutathione S-transferase P	Leukocyte elastase		Estrogen receptor	Mitogen-activated protein kinase 14
UDP-N-acetylhexosamine pyrophosphorylase	Thymidylate kinase	Sulfotransferase family cytosolic 2B member 1	UDP-N-acetylhexosamine pyrophosphorylase	Glucose-6-phosphate 1-dehydrogenase	Bile salt sulfotransferase	Beta-secretase 1	Glutathione S-transferase P		Serine/threonine-protein kinase PAK 6	Glutathione S-transferase Mu 2	RAC-alpha serine/threonine-protein kinase			Histo-blood group ABO system transferase			Estradiol 17-beta-dehydrogenase 1	Estradiol 17-beta-dehydrogenase 1	Cell division protein kinase 2		Proto-oncogene tyrosine-protein kinase Src					Matrix metalloproteinase-9	Glucocorticoid receptor	Peptidyl-prolyl cis-trans isomerase FKBP1A	Matrix metalloproteinase-9	Tyrosine-protein phosphatase non-receptor type 1	Mitogen-activated protein kinase 14	Heat shock protein HSP 90-alpha	3-hydroxy-3-methylglutaryl-coenzyme A reductase	3-hydroxy-3-methylglutaryl-coenzyme A reductase		Angiogenin	cAMP-specific 3,5-cyclic phosphodiesterase 4D	Heat shock protein HSP 90-alpha		Beta-secretase 1	Non-secretory ribonuclease	Thymidylate kinase	Glutathione S-transferase P	Coagulation factor X	Beta-secretase 1	Heat shock protein HSP 90-alpha		Kinesin-like protein KIF11	Protein-glutamine gamma-glutamyltransferase E
Eosinophil cationic protein	Farnesyl pyrophosphate synthetase	Glutathione S-transferase P	Eosinophil cationic protein	Heat shock protein HSP 90-alpha	Heat shock protein HSP 90-alpha	3-phosphoinositide-dependent protein kinase 1	Nicotinamide mononucleotide adenylyltransferase 3		Phosphoenolpyruvate carboxykinase, cytosolic [GTP]	Hydroxyacylglutathione hydrolase, mitochondrial	Aldose reductase			Heat shock protein HSP 90-alpha			Serine/threonine-protein kinase Chk1	Aldo-keto reductase family 1 member C3	cAMP-specific 3,5-cyclic phosphodiesterase 4D		Tyrosine-protein kinase BTK					Phosphoenolpyruvate carboxykinase, cytosolic [GTP]	Proto-oncogene tyrosine-protein kinase LCK	Corticosteroid 11-beta-dehydrogenase isozyme 1	S-methyl-5-thioadenosine phosphorylase	Galectin-2	Interleukin-2	Androgen receptor	Transthyretin	Aldose reductase		Bifunctional purine biosynthesis protein PURH	Tyrosine-protein phosphatase non-receptor type 1	Ras-related protein Rab-11A		Cell division protein kinase 2	Dihydroorotate dehydrogenase, mitochondrial	Mitogen-activated protein kinase 14	Glutathione S-transferase P	SEC14-like protein 2	Antigen peptide transporter 1	Peptidyl-prolyl cis-trans isomerase FKBP1A		Cell division protein kinase 2	Glutathione S-transferase A1
Heat shock protein HSP 90-alpha	3 histone mRNA exonuclease 1	Scavenger mRNA-decapping enzyme DcpS	Heat shock protein HSP 90-alpha	NAD-dependent deacetylase sirtuin-5	Glucocorticoid receptor	Non-secretory ribonuclease	Serine--pyruvate aminotransferase		Ras-related protein Rab-11A	Galectin-7	Eukaryotic translation initiation factor 4E			Ras-related protein Rap-2a			Tyrosine-protein phosphatase non-receptor type 1	Prothrombin	Carbonic anhydrase 2		Heat shock protein HSP 90-alpha					Glycogen synthase kinase-3 beta	Glycogen synthase kinase-3 beta	Cell division protein kinase 2	Prothrombin	Uridine-cytidine kinase 2	3-hydroxy-3-methylglutaryl-coenzyme A reductase	Cell division protein kinase 2	Peroxisome proliferator-activated receptor gamma	Dual specificity mitogen-activated protein kinase kinase 1		Phenylalanine-4-hydroxylase	Tryptophanyl-tRNA synthetase, cytoplasmic	Glucose-6-phosphate isomerase		Ras-related protein Rap-2a	NONE	Serine/threonine-protein kinase Chk1	NONE	Heat shock protein HSP 90-alpha	Beta-secretase 1	ADAM 17		Cell division protein kinase 2	Estrogen receptor
Prothrombin	Cell division control protein 42 homolog	Serine/threonine-protein kinase PAK 6	Prothrombin	Proto-oncogene tyrosine-protein kinase Src	Sepiapterin reductase	Inosine-5-monophosphate dehydrogenase 1	Phosphoenolpyruvate carboxykinase, cytosolic [GTP]		Hydroxyacyl-coenzyme A dehydrogenase, mitochondrial	Glutathione S-transferase A1	Inosine-5-monophosphate dehydrogenase 1			Adenosine kinase			Corticosteroid 11-beta-dehydrogenase isozyme 1	Cyclin-A2	Cyclin-A2		Aldo-keto reductase family 1 member C3					Phosphoenolpyruvate carboxykinase, cytosolic [GTP]	Heat shock protein HSP 90-alpha	Heat shock protein HSP 90-alpha	Beta-secretase 1	Cathepsin B	Uridine-cytidine kinase 2	Cell division protein kinase 2	Thyroid hormone receptor beta	Tyrosine-protein phosphatase non-receptor type 1		Cell division protein kinase 2	Nicotinamide mononucleotide adenylyltransferase 1	Tryptophanyl-tRNA synthetase, cytoplasmic		Glutathione S-transferase P	Phosphoenolpyruvate carboxykinase, cytosolic [GTP]	Tyrosine-protein phosphatase non-receptor type 1	Vascular endothelial growth factor receptor 2	Renin	Beta-secretase 1	Nuclear receptor subfamily 1 group I member 2		Transforming growth factor beta-2	NONE
Stromelysin-1	Proto-oncogene tyrosine-protein kinase Src	Fructose-bisphosphate aldolase A	Stromelysin-1	Thymidylate kinase	cAMP-specific 3,5-cyclic phosphodiesterase 4D	Nitric oxide synthase, inducible	Tyrosine-protein phosphatase non-receptor type 1		Carbonic anhydrase 2	C-C motif chemokine 5	Thymidylate kinase			Glycogen phosphorylase, liver form			3-hydroxy-3-methylglutaryl-coenzyme A reductase	Histo-blood group ABO system transferase	Cellular retinoic acid-binding protein 2		Thymidylate kinase					Heat shock 70 kDa protein 1	Heat shock protein HSP 90-alpha	Histone acetyltransferase PCAF	Androgen receptor	L-serine dehydratase	Macrophage metalloelastase	Proto-oncogene tyrosine-protein kinase LCK	Serine/threonine-protein phosphatase PP1-gamma catalytic subunit	3-hydroxy-3-methylglutaryl-coenzyme A reductase		Glycogen phosphorylase, liver form	L-serine dehydratase	Ras-related protein Rab-5A		Cellular retinoic acid-binding protein 2	Transthyretin	Heat shock protein HSP 90-alpha	Cathepsin K	NONE	B-Raf proto-oncogene serine/threonine-protein kinase	B-Raf proto-oncogene serine/threonine-protein kinase		cAMP-dependent protein kinase catalytic subunit alpha	[Pyruvate dehydrogenase [lipoamide]] kinase isozyme 2, mitochondrial
Eukaryotic translation initiation factor 4E	Tyrosine-protein phosphatase non-receptor type 1	Farnesyl pyrophosphate synthetase	Eukaryotic translation initiation factor 4E	Kinesin-like protein KIF11	Heat shock protein HSP 90-alpha	Trifunctional purine biosynthetic protein adenosine-3	Phosphoenolpyruvate carboxykinase, cytosolic [GTP]		Nitric oxide synthase, inducible	Neutrophil collagenase	Mast/stem cell growth factor receptor			Peptidyl-prolyl cis-trans isomerase FKBP1A			Carbonic anhydrase 2	Androgen receptor	Tyrosine-protein phosphatase non-receptor type 1		GTPase HRas					GTP-binding nuclear protein Ran	Renin	Serine--pyruvate aminotransferase	Histo-blood group ABO system transferase	Glucose-6-phosphate isomerase	Peroxisome proliferator-activated receptor alpha	Macrophage metalloelastase	Oxysterols receptor LXR-beta	Retinoic acid receptor RXR-alpha		Glutathione S-transferase P	Inositol monophosphatase	RAC-alpha serine/threonine-protein kinase		Eukaryotic translation initiation factor 4E	Vascular endothelial growth factor receptor 2	Sulfotransferase family cytosolic 2B member 1	Mitogen-activated protein kinase 14	Mitogen-activated protein kinase 14	Methionine aminopeptidase 2	Methionine aminopeptidase 2		Proto-oncogene tyrosine-protein kinase Src	Cell division protein kinase 2
Histidine triad nucleotide-binding protein 1	Sepiapterin reductase	Estrogen sulfotransferase	Histidine triad nucleotide-binding protein 1	Glycogen phosphorylase, liver form	Beta-secretase 1	Proto-oncogene serine/threonine-protein kinase Pim-1	Glycogen synthase kinase-3 beta		ADP-ribosylation factor-like protein 5B	Thymidylate kinase	Tyrosine-protein kinase BTK			Scavenger mRNA-decapping enzyme DcpS			Prothrombin	Estrogen receptor	Peptidyl-prolyl cis-trans isomerase FKBP1A		Uridine-cytidine kinase 2					Matrix metalloproteinase-9	Tyrosine-protein kinase ITK/TSK	Chymase	Fibroblast growth factor receptor 2	Eukaryotic translation initiation factor 4E	Nuclear receptor subfamily 1 group I member 2	Prothrombin	Estrogen receptor	Peroxisome proliferator-activated receptor gamma		Ras-related protein Rab-9	Serine/threonine-protein kinase 6	Tyrosine-protein phosphatase non-receptor type 1		Renin	Cell division protein kinase 2	Glutathione S-transferase A1	Serum albumin	Glutathione S-transferase P	Cell division protein kinase 2	Vascular endothelial growth factor receptor 2		Serine/threonine-protein kinase Chk1	Beta-secretase 1
Renin	Mitogen-activated protein kinase 10	E-selectin	Renin	E-selectin	Adenosylhomocysteinase	Nucleoside diphosphate kinase B	Death-associated protein kinase 1		6-phosphofructo-2-kinase/fructose-2,6-biphosphatase 1	Sulfotransferase family cytosolic 2B member 1	Zinc-alpha-2-glycoprotein			Glutathione S-transferase Mu 2			Retinoic acid receptor gamma	Protein-glutamine gamma-glutamyltransferase E	Beta-secretase 1		Pyridoxine-5-phosphate oxidase					Thyroid hormone receptor beta	Retinoic acid receptor gamma	Tyrosine-protein phosphatase non-receptor type 1	Heat shock protein HSP 90-alpha	Coagulation factor XI	Oxysterols receptor LXR-beta	Cathepsin F	Cell division protein kinase 2	Cell division protein kinase 2		Histo-blood group ABO system transferase	Proto-oncogene tyrosine-protein kinase Src	Tyrosine-protein phosphatase non-receptor type 1		Vitamin D3 receptor	GTPase HRas	Glutathione S-transferase P	Cell division protein kinase 2	Cell division protein kinase 2	Beta-secretase 1	B-Raf proto-oncogene serine/threonine-protein kinase		Dihydroorotate dehydrogenase, mitochondrial	3-phosphoinositide-dependent protein kinase 1
Poly [ADP-ribose] polymerase 1	Glycogen synthase kinase-3 beta	Stromelysin-1	Poly [ADP-ribose] polymerase 1	Riboflavin kinase	Glucosamine-6-phosphate isomerase	Peptidyl-prolyl cis-trans isomerase FKBP1A	Inositol monophosphatase		NONE	Glutathione reductase, mitochondrial	C-C motif chemokine 5			Thymidylate kinase			Beta-secretase 1	Carbonic anhydrase 2	Prothrombin		Glutathione S-transferase P					ADP-ribosylation factor-like protein 5B	Prothrombin	Tryptophan 5-hydroxylase 1	3-hydroxy-3-methylglutaryl-coenzyme A reductase	Ornithine carbamoyltransferase, mitochondrial	Methionine aminopeptidase 2	Basic fibroblast growth factor receptor 1	Endothelial protein C receptor	Serine/threonine-protein kinase Chk1		Carbonic anhydrase 2	Branched-chain-amino-acid aminotransferase, mitochondrial	Tryptophan 5-hydroxylase 1		Farnesyl pyrophosphate synthetase	Heat shock protein HSP 90-alpha	Ephrin type-B receptor 4	Serum albumin	Glutathione S-transferase P	Glutathione S-transferase A1	Dual specificity mitogen-activated protein kinase kinase 1		Serum albumin	Mitogen-activated protein kinase 14
Carbonic anhydrase 2	Triosephosphate isomerase	Glutathione S-transferase P	Carbonic anhydrase 2	Cell division protein kinase 2	Apoptotic protease-activating factor 1	Tryptophanyl-tRNA synthetase, cytoplasmic	Branched-chain-amino-acid aminotransferase, mitochondrial		Prothrombin	Dihydrofolate reductase	Bifunctional heparan sulfate N-deacetylase/N-sulfotransferase 1			Dihydrofolate reductase			Fatty acid-binding protein, heart	Vitamin D3 receptor	Cell division protein kinase 2		Nicotinamide mononucleotide adenylyltransferase 3					Riboflavin kinase	Glucocorticoid receptor	Peroxisome proliferator-activated receptor alpha	Macrophage metalloelastase	Vitamin D3 receptor	Transthyretin	Methionine aminopeptidase 2	Prothrombin	Serine/threonine-protein kinase Chk1		6-phosphofructo-2-kinase/fructose-2,6-biphosphatase 1	Insulin receptor	E-selectin		Proto-oncogene tyrosine-protein kinase Src	B-Raf proto-oncogene serine/threonine-protein kinase	Glutathione S-transferase P	Coagulation factor X	MAP kinase-activated protein kinase 2	Glutathione S-transferase P	Serine/threonine-protein kinase Chk1		cAMP-specific 3,5-cyclic phosphodiesterase 4D	Carbonic anhydrase 2
Carbonic anhydrase 2	UDP-N-acetylhexosamine pyrophosphorylase	Glycogen synthase kinase-3 beta	Carbonic anhydrase 2	Stromelysin-1	Adenosylhomocysteinase	Heat shock protein homolog SSE1	Prostatic acid phosphatase		Pyruvate kinase isozymes R/L	GTP-binding nuclear protein Ran	Branched-chain-amino-acid aminotransferase, mitochondrial			Insulin receptor			Retinoic acid receptor RXR-alpha	Amine oxidase [flavin-containing] B	Amine oxidase [flavin-containing] B		Glutathione S-transferase P					Farnesyl pyrophosphate synthetase	Matrix metalloproteinase-9	Glutathione S-transferase P	3 histone mRNA exonuclease 1	Dual specificity mitogen-activated protein kinase kinase 1	Transthyretin	Proto-oncogene tyrosine-protein kinase LCK	Thyroid hormone receptor beta	Nuclear receptor ROR-alpha		Leukocyte elastase	cAMP-specific 3,5-cyclic phosphodiesterase 4B	Tyrosine-protein phosphatase non-receptor type 1		Mitogen-activated protein kinase 14	Beta-hexosaminidase beta chain	Beta-secretase 1	Carbonic anhydrase 2	Chitotriosidase-1	Mitogen-activated protein kinase 14	Beta-secretase 1		Tyrosine-protein phosphatase non-receptor type 1	Androgen receptor
Proto-oncogene tyrosine-protein kinase Src	Glutathione S-transferase A1	Hypoxanthine-guanine phosphoribosyltransferase	Proto-oncogene tyrosine-protein kinase Src	Tyrosine-protein phosphatase non-receptor type 1	Amine oxidase [flavin-containing] B	Sulfotransferase family cytosolic 2B member 1	Ras-related C3 botulinum toxin substrate 1		Cytidine deaminase	Insulin receptor	Signal transducer and activator of transcription 1-alpha/beta			Non-secretory ribonuclease			Cyclin-A2	cAMP-specific 3,5-cyclic phosphodiesterase 4D	Proto-oncogene tyrosine-protein kinase Src		Pyruvate kinase isozymes R/L					Death-associated protein kinase 1	Matrix metalloproteinase-9	Serine/threonine-protein kinase Chk1	Heat shock protein HSP 90-alpha	Neutrophil collagenase	Peroxisome proliferator-activated receptor gamma	Protein S100-A9	cAMP-specific 3,5-cyclic phosphodiesterase 4B	NONE		Ras-related protein Rab-11A	Prostatic acid phosphatase	Cell division protein kinase 2		NAD-dependent deacetylase sirtuin-5	Caspase-3	Angiopoietin-1 receptor	Coagulation factor X	Hydroxyacyl-coenzyme A dehydrogenase, mitochondrial	NONE	Vitamin D3 receptor		cAMP-specific 3,5-cyclic phosphodiesterase 4B	Amine oxidase [flavin-containing] B
Stromelysin-1	Tryptophanyl-tRNA synthetase, cytoplasmic	Glutathione S-transferase A1	Stromelysin-1	Glutathione S-transferase P	Proto-oncogene tyrosine-protein kinase Src	Glutathione S-transferase P	Glycogen synthase kinase-3 beta		Sulfotransferase 1A1	Eukaryotic translation initiation factor 4E	Ras-related protein Rap-2a			Spliceosome RNA helicase BAT1			NONE	Estrogen receptor	Gastrotropin		Sulfotransferase 1A1					Trifunctional purine biosynthetic protein adenosine-3	Methionine aminopeptidase 2	Renin	Proto-oncogene serine/threonine-protein kinase Pim-1	ADP-ribosylation factor-like protein 5B	3-hydroxy-3-methylglutaryl-coenzyme A reductase	Heat shock protein HSP 90-alpha	Carbonic anhydrase 2	Coagulation factor XI		Ras-related protein Rab-5A	Glycogen synthase kinase-3 beta	Matrilysin		Mitogen-activated protein kinase 14	Beta-secretase 1	Tyrosine-protein phosphatase non-receptor type 1	Beta-secretase 1	Baculoviral IAP repeat-containing protein 7	Dipeptidase 1	Prothrombin		Carbonic anhydrase 2	Tyrosine-protein phosphatase non-receptor type 1
Peptidyl-prolyl cis-trans isomerase FKBP1A	Bifunctional heparan sulfate N-deacetylase/N-sulfotransferase 1	Basic fibroblast growth factor receptor 1	Peptidyl-prolyl cis-trans isomerase FKBP1A	Phospholipase A2, membrane associated	Phenylethanolamine N-methyltransferase	Beta-secretase 1	Proto-oncogene tyrosine-protein kinase Src		Inosine-5-monophosphate dehydrogenase 2	Urokinase-type plasminogen activator	Galectin-3			Beta-secretase 1			Prothrombin	Serum albumin	Estrogen-related receptor gamma		Sulfotransferase family cytosolic 2B member 1					Antigen peptide transporter 1	Renin	Peptidyl-prolyl cis-trans isomerase FKBP1A	Retinoic acid receptor RXR-beta	Neutrophil gelatinase-associated lipocalin	Estrogen receptor	Neprilysin	Serum albumin	Macrophage metalloelastase		ADP-ribosylation factor-like protein 5B	Ras-related C3 botulinum toxin substrate 1	Nitric oxide synthase, inducible		Proto-oncogene tyrosine-protein kinase LCK	Cellular retinoic acid-binding protein 2	Methionine aminopeptidase 2	Trifunctional purine biosynthetic protein adenosine-3	Glutathione-requiring prostaglandin D synthase	Mitogen-activated protein kinase 10	Basic fibroblast growth factor receptor 1		Tyrosine-protein phosphatase non-receptor type 1	Estrogen receptor
Endoplasmic reticulum mannosyl-oligosaccharide 1,2-alpha-mannosidase	Glutathione S-transferase Mu 1	Bile salt sulfotransferase	Endoplasmic reticulum mannosyl-oligosaccharide 1,2-alpha-mannosidase	Glutathione S-transferase P	Thymidylate kinase	Inosine-5-monophosphate dehydrogenase 2	Stromelysin-1		Phosphoenolpyruvate carboxykinase, cytosolic [GTP]	Mitogen-activated protein kinase 10	Sulfotransferase family cytosolic 2B member 1			Glutathione S-transferase Mu 2			Cell division protein kinase 2	Cyclin-A2	E3 ubiquitin-protein ligase Mdm2		Serum amyloid P-component					Uridine-cytidine kinase 2	Histone deacetylase 8	Bile acid receptor	Stromelysin-1	Tyrosine-protein phosphatase non-receptor type 1	Alpha-tocopherol transfer protein	Interstitial collagenase	Macrophage migration inhibitory factor	Tyrosine-protein phosphatase non-receptor type 1		Glutathione S-transferase P	Aldose reductase	Tyrosine-protein phosphatase non-receptor type 1		Glucosylceramidase	Histidine triad nucleotide-binding protein 1	Vascular endothelial growth factor receptor 2	Beta-secretase 1	Heat shock protein HSP 90-alpha	Serine/threonine-protein phosphatase PP1-gamma catalytic subunit	Coagulation factor X		Mitogen-activated protein kinase 14	cAMP-dependent protein kinase catalytic subunit alpha
Tryptase beta-2	Tyrosine-protein phosphatase non-receptor type 1	Beta-secretase 1	Tryptase beta-2	Neprilysin	Uridine-cytidine kinase 2	Phosphoenolpyruvate carboxykinase, cytosolic [GTP]	Thymidylate kinase		Cathepsin K	C-C motif chemokine 5	Glutathione S-transferase P			Ornithine aminotransferase, mitochondrial			Fatty acid-binding protein, brain	Cell division protein kinase 2	Proto-oncogene serine/threonine-protein kinase Pim-1		NONE					Glutathione S-transferase omega-1	Macrophage metalloelastase	Peptidyl-prolyl cis-trans isomerase FKBP1A	Heat shock protein HSP 90-alpha	Angiogenin	Peroxisome proliferator-activated receptor gamma	Mitogen-activated protein kinase 14	Beta-secretase 1	Beta-secretase 1		Glutathione S-transferase A3	Glutathione S-transferase Mu 1	Aldose reductase		Vascular endothelial growth factor receptor 2	Heat shock protein HSP 90-alpha	Retinoic acid receptor gamma	Cell division protein kinase 2	Prothrombin	Leukotriene A-4 hydrolase	Glutathione-requiring prostaglandin D synthase		Baculoviral IAP repeat-containing protein 4	Dihydrofolate reductase
Heat shock protein HSP 90-alpha	Angiotensin-converting enzyme	3-phosphoinositide-dependent protein kinase 1	Heat shock protein HSP 90-alpha	Cathepsin G	Beta-secretase 1	Angiotensin-converting enzyme	Ornithine aminotransferase, mitochondrial		GTP-binding nuclear protein Ran	Phosphoenolpyruvate carboxykinase, cytosolic [GTP]	Hypoxanthine-guanine phosphoribosyltransferase			Deoxyuridine 5-triphosphate nucleotidohydrolase, mitochondrial			Fatty acid-binding protein, brain	Mineralocorticoid receptor	Retinoic acid receptor gamma		Riboflavin kinase					Inositol monophosphatase	Tyrosine-protein phosphatase non-receptor type 1	Tyrosine-protein phosphatase non-receptor type 1	Cell division protein kinase 6	Histo-blood group ABO system transferase	Phosphatidylcholine transfer protein	Insulin receptor	cAMP-dependent protein kinase catalytic subunit alpha	3-hydroxy-3-methylglutaryl-coenzyme A reductase		GMP reductase 1	Riboflavin kinase	Glycogen synthase kinase-3 beta		NONE	Proto-oncogene tyrosine-protein kinase ABL1	Renin	Flavin reductase	Beta-secretase 1	B-Raf proto-oncogene serine/threonine-protein kinase	Ephrin type-B receptor 4		Estrogen receptor	Histo-blood group ABO system transferase
Beta-secretase 1	Ras-related protein Rab-5A	Non-secretory ribonuclease	Beta-secretase 1	Tyrosine-protein phosphatase non-receptor type 1	Adenine phosphoribosyltransferase	Cell division protein kinase 2	Tryptophanyl-tRNA synthetase, cytoplasmic		Glucose-6-phosphate isomerase	Glutathione S-transferase P	Hydroxyacylglutathione hydrolase, mitochondrial			Thymidylate kinase			Tyrosine-protein phosphatase non-receptor type 1	Peptidyl-prolyl cis-trans isomerase FKBP1A	Estrogen receptor		Glutathione S-transferase P					Eukaryotic translation initiation factor 4E	NONE	MAP kinase-activated protein kinase 2	Protein-glutamine gamma-glutamyltransferase E	Tyrosine-protein kinase HCK	Histamine N-methyltransferase	Mitogen-activated protein kinase 10	Proto-oncogene tyrosine-protein kinase LCK	cAMP-dependent protein kinase catalytic subunit alpha		Protein-glutamine gamma-glutamyltransferase E	Sepiapterin reductase	Chitotriosidase-1		Proto-oncogene tyrosine-protein kinase Src	Beta-secretase 1	Glutathione S-transferase P	Cell division protein kinase 2	Mitogen-activated protein kinase 14	Mitogen-activated protein kinase 14	Cell division protein kinase 2		Heat shock protein HSP 90-alpha	Tyrosine-protein phosphatase non-receptor type 1
Glycogen synthase kinase-3 beta	Hypoxanthine-guanine phosphoribosyltransferase	Nicotinamide mononucleotide adenylyltransferase 1	Glycogen synthase kinase-3 beta	Inosine-5-monophosphate dehydrogenase 2	Thymidylate kinase	Glutathione S-transferase P	Spliceosome RNA helicase BAT1		Neutrophil collagenase	Glucosamine-6-phosphate isomerase	Heat shock protein HSP 90-alpha			Nucleoside diphosphate kinase B			Estradiol 17-beta-dehydrogenase 1	Prothrombin	Tyrosine-protein phosphatase non-receptor type 1		Glycogen synthase kinase-3 beta					NONE	Cyclin-A2	Tyrosine-protein phosphatase non-receptor type 1	Leukotriene A-4 hydrolase	Riboflavin kinase	NAD(P)H dehydrogenase [quinone] 1	Neprilysin	NONE	Carbonic anhydrase 2		Histo-blood group ABO system transferase	Dihydrofolate reductase	Sulfotransferase family cytosolic 2B member 1		Deoxyuridine 5-triphosphate nucleotidohydrolase, mitochondrial	Pyruvate kinase isozymes R/L	tRNA (cytosine-5-)-methyltransferase	Mitogen-activated protein kinase 14	Flavin reductase	Prothrombin	Beta-secretase 1		Estradiol 17-beta-dehydrogenase 1	Heat shock protein HSP 90-alpha
Cell division protein kinase 7	Glucose-6-phosphate isomerase	Tyrosine-protein phosphatase non-receptor type 1	Cell division protein kinase 7	RAF proto-oncogene serine/threonine-protein kinase	Uridine-cytidine kinase 2	Adenosylhomocysteinase	Eosinophil cationic protein		Ras-related C3 botulinum toxin substrate 1	Phenylalanine-4-hydroxylase	Sepiapterin reductase			Serine/threonine-protein kinase Chk1			Cell division protein kinase 2	Tyrosine-protein phosphatase non-receptor type 1	cAMP-specific 3,5-cyclic phosphodiesterase 4D		Glutathione S-transferase Mu 2					Tyrosine-protein phosphatase non-receptor type 1	Serine/threonine-protein kinase 6	Glutathione S-transferase A1	Mitogen-activated protein kinase 14	Beta-secretase 1	Neutrophil collagenase	Tryptophan 5-hydroxylase 1	Cell division protein kinase 6	Renin		Heat shock protein HSP 90-alpha	ADP-ribosylation factor 4	Glutathione S-transferase P		ADP-ribosylation factor 4	Interleukin-2	Cell division protein kinase 2	Antigen peptide transporter 1	Coagulation factor X	Isovaleryl-CoA dehydrogenase, mitochondrial	Renin		Glycogen synthase kinase-3 beta	Serum albumin
Stromelysin-1	Glucose-6-phosphate 1-dehydrogenase	Early endosome antigen 1	Stromelysin-1	Thymidylate kinase	3 histone mRNA exonuclease 1	Stromelysin-1	Glycogen synthase kinase-3 beta		Non-secretory ribonuclease	Riboflavin kinase	Histone acetyltransferase PCAF			Glutathione S-transferase A3			Glutathione S-transferase P	Neprilysin	cAMP-specific 3,5-cyclic phosphodiesterase 4D		Cathepsin G					Thyroid hormone receptor beta	Renin	Caspase-1	Corticosteroid 11-beta-dehydrogenase isozyme 1	Proto-oncogene tyrosine-protein kinase Src	Tyrosine-protein kinase JAK2	Cell division protein kinase 2	Prothrombin	Tyrosine-protein kinase ITK/TSK		Ras-related protein Rab-5A	Bifunctional heparan sulfate N-deacetylase/N-sulfotransferase 1	GMP reductase 2		Mitogen-activated protein kinase 14	Growth factor receptor-bound protein 2	Nuclear receptor subfamily 1 group I member 3	Proto-oncogene tyrosine-protein kinase ABL1	Coagulation factor X	3 histone mRNA exonuclease 1	Corticosteroid 11-beta-dehydrogenase isozyme 1		Carbonic anhydrase 2	Cellular retinoic acid-binding protein 2
Inositol monophosphatase	Spliceosome RNA helicase BAT1	Thymidine kinase, cytosolic	Inositol monophosphatase	Angiogenin	Urokinase-type plasminogen activator	Branched-chain-amino-acid aminotransferase, mitochondrial	Macrophage metalloelastase		Trifunctional purine biosynthetic protein adenosine-3	ADP-ribosyl cyclase 2	Bifunctional 3-phosphoadenosine 5-phosphosulfate synthetase 1			Phosphoenolpyruvate carboxykinase, cytosolic [GTP]			Dipeptidyl peptidase 4	Estradiol 17-beta-dehydrogenase 1	Peptidyl-prolyl cis-trans isomerase FKBP1A		Inosine-5-monophosphate dehydrogenase 2					Proto-oncogene tyrosine-protein kinase LCK	Carbonyl reductase [NADPH] 1	Fatty acid-binding protein, heart	ADP-ribosyl cyclase 2	Glycogen synthase kinase-3 beta	Glucocorticoid receptor	Peptidyl-prolyl cis-trans isomerase FKBP1A	Proto-oncogene tyrosine-protein kinase ABL1	Cell division protein kinase 2		Pyruvate kinase isozymes R/L	NONE	Interleukin-2		Angiogenin	Cell division protein kinase 2	Serum albumin	Tyrosine-protein phosphatase non-receptor type 1	Mitogen-activated protein kinase 14	MAP kinase-activated protein kinase 2	Glutathione S-transferase P		Mitogen-activated protein kinase 10	Beta-secretase 1
Macrophage metalloelastase	Chymase	Inosine-5-monophosphate dehydrogenase 2	Macrophage metalloelastase	Heat shock protein HSP 90-alpha	Glutathione S-transferase A1	Neprilysin	ADP-ribosylation factor 4		C-C motif chemokine 5	Histo-blood group ABO system transferase	Histo-blood group ABO system transferase			Proto-oncogene tyrosine-protein kinase LCK			Phospholipase A2, membrane associated	Proto-oncogene tyrosine-protein kinase Src	Adenosine kinase		Inosine-5-monophosphate dehydrogenase 1					Ras-related protein Rab-11A	Beta-secretase 1	Tyrosine-protein kinase ITK/TSK	Androgen receptor	Ras-related protein Rab-5A	Proto-oncogene tyrosine-protein kinase Src	Beta-secretase 1	Histone deacetylase 8	Glycogen synthase kinase-3 beta		Serine/threonine-protein kinase 6	Glutathione S-transferase P	Insulin-like growth factor IA		Aldose reductase	Cell division protein kinase 2	Mitogen-activated protein kinase 14	Macrophage metalloelastase	Aldose reductase	Cell division protein kinase 2	Glutathione S-transferase P		Sex hormone-binding globulin	Transforming growth factor beta-2
[truncated: 94 more columns]

## Sheet: list 2 signaling pathways
Supplementary list 2: Enriched Signalling pathways acquired using DAVID along with related chemotherapeutic drugs.
5- FU	BLEOMYCIN	BUSULPHAN	Camptothecin	Carboplatin	CISPLATIN	Cyclophosphamide	CYTARABINE	DASATINIB	Daunorubicin	DOETAXEL	Doxorubicin	EPIRUBICIN	ERLOTINIB	ETOPOSIDE	EVEROLIMUS	GEMCITABINE	Idarubicin	Ifosfamide	Imatinib	Lapatinib	Methotrexate	Mitomycin	Mitoxantrone	Nilotinib	Paclitaxel	Pazopanib	Sorafenib	Sunitinib	Tamoxifen	Temsirolimus	Thalidomide	Vemurafenib	Vincristine
hsa04370:VEGF signaling pathway	hsa00230:Purine metabolism	hsa00230:Purine metabolism	hsa05200:Pathways in cancer	hsa00480:Glutathione metabolism	hsa05200:Pathways in cancer	hsa05200:Pathways in cancer	hsa04370:VEGF signaling pathway	hsa05200:Pathways in cancer	hsa05200:Pathways in cancer	hsa05200:Pathways in cancer	hsa05200:Pathways in cancer	hsa05200:Pathways in cancer	hsa05200:Pathways in cancer	hsa05215:Prostate cancer	hsa05200:Pathways in cancer	hsa04910:Insulin signaling pathway	hsa05200:Pathways in cancer	hsa05200:Pathways in cancer	hsa05200:Pathways in cancer	hsa05200:Pathways in cancer	hsa04910:Insulin signaling pathway	hsa00230:Purine metabolism	hsa04370:VEGF signaling pathway	hsa05200:Pathways in cancer	hsa05200:Pathways in cancer	hsa05200:Pathways in cancer	hsa05200:Pathways in cancer	hsa05200:Pathways in cancer	hsa05215:Prostate cancer	hsa04910:Insulin signaling pathway	hsa04370:VEGF signaling pathway	hsa05200:Pathways in cancer	hsa05200:Pathways in cancer
hsa04910:Insulin signaling pathway	hsa04370:VEGF signaling pathway	hsa00480:Glutathione metabolism	hsa05215:Prostate cancer	hsa04910:Insulin signaling pathway	hsa00480:Glutathione metabolism	hsa05215:Prostate cancer	hsa00230:Purine metabolism	hsa04910:Insulin signaling pathway	hsa05212:Pancreatic cancer	hsa00980:Metabolism of xenobiotics by cytochrome P450	hsa00980:Metabolism of xenobiotics by cytochrome P450	hsa04910:Insulin signaling pathway	hsa05215:Prostate cancer	hsa04910:Insulin signaling pathway	hsa03320:PPAR signaling pathway	hsa00980:Metabolism of xenobiotics by cytochrome P450	hsa04910:Insulin signaling pathway	hsa05215:Prostate cancer	hsa05215:Prostate cancer	hsa05215:Prostate cancer	hsa04370:VEGF signaling pathway	hsa04370:VEGF signaling pathway	hsa04910:Insulin signaling pathway	hsa03320:PPAR signaling pathway	hsa04910:Insulin signaling pathway	hsa04910:Insulin signaling pathway	hsa04370:VEGF signaling pathway	hsa05215:Prostate cancer	hsa05223:Non-small cell lung cancer	hsa05200:Pathways in cancer	hsa05215:Prostate cancer	hsa05215:Prostate cancer	hsa04910:Insulin signaling pathway
hsa05215:Prostate cancer	hsa00480:Glutathione metabolism	hsa04370:VEGF signaling pathway	hsa04914:Progesterone-mediated oocyte maturation	hsa04614:Renin-angiotensin system	hsa00980:Metabolism of xenobiotics by cytochrome P450	hsa05212:Pancreatic cancer	hsa00980:Metabolism of xenobiotics by cytochrome P450	hsa05215:Prostate cancer	hsa04910:Insulin signaling pathway	hsa04910:Insulin signaling pathway	hsa04370:VEGF signaling pathway	hsa05215:Prostate cancer	hsa04910:Insulin signaling pathway	hsa05200:Pathways in cancer	hsa04910:Insulin signaling pathway	hsa00982:Drug metabolism	hsa05212:Pancreatic cancer	hsa04910:Insulin signaling pathway	hsa04914:Progesterone-mediated oocyte maturation	hsa04910:Insulin signaling pathway	hsa05223:Non-small cell lung cancer	hsa04910:Insulin signaling pathway	hsa00480:Glutathione metabolism	hsa05215:Prostate cancer	hsa04914:Progesterone-mediated oocyte maturation	hsa05215:Prostate cancer	hsa04910:Insulin signaling pathway	hsa05210:Colorectal cancer	hsa05200:Pathways in cancer	hsa00980:Metabolism of xenobiotics by cytochrome P450	hsa04910:Insulin signaling pathway	hsa05210:Colorectal cancer	hsa05215:Prostate cancer
hsa00980:Metabolism of xenobiotics by cytochrome P450	hsa04910:Insulin signaling pathway	hsa04910:Insulin signaling pathway	hsa05223:Non-small cell lung cancer	hsa00230:Purine metabolism	hsa00982:Drug metabolism	hsa05223:Non-small cell lung cancer	hsa00480:Glutathione metabolism	hsa04370:VEGF signaling pathway	hsa00980:Metabolism of xenobiotics by cytochrome P450	hsa00982:Drug metabolism	hsa04664:Fc epsilon RI signaling pathway	hsa05210:Colorectal cancer	hsa00980:Metabolism of xenobiotics by cytochrome P450	hsa04914:Progesterone-mediated oocyte maturation	hsa05215:Prostate cancer	hsa05200:Pathways in cancer	hsa05223:Non-small cell lung cancer	hsa05210:Colorectal cancer	hsa04910:Insulin signaling pathway	hsa05223:Non-small cell lung cancer	hsa00980:Metabolism of xenobiotics by cytochrome P450	hsa00480:Glutathione metabolism	hsa00620:Pyruvate metabolism	hsa04910:Insulin signaling pathway	hsa04370:VEGF signaling pathway	hsa04912:GnRH signaling pathway	hsa05215:Prostate cancer	hsa04910:Insulin signaling pathway	hsa04910:Insulin signaling pathway	hsa00982:Drug metabolism	hsa05200:Pathways in cancer	hsa04914:Progesterone-mediated oocyte maturation	hsa03320:PPAR signaling pathway
hsa00982:Drug metabolism	hsa04664:Fc epsilon RI signaling pathway	hsa00980:Metabolism of xenobiotics by cytochrome P450	hsa04910:Insulin signaling pathway	hsa00270:Cysteine and methionine metabolism	hsa03320:PPAR signaling pathway	hsa05210:Colorectal cancer	hsa00982:Drug metabolism	hsa05223:Non-small cell lung cancer	hsa05215:Prostate cancer	hsa05215:Prostate cancer	hsa04910:Insulin signaling pathway	hsa04664:Fc epsilon RI signaling pathway	hsa05223:Non-small cell lung cancer	hsa00230:Purine metabolism	hsa00980:Metabolism of xenobiotics by cytochrome P450	hsa04370:VEGF signaling pathway	hsa05210:Colorectal cancer	hsa03320:PPAR signaling pathway	hsa05210:Colorectal cancer	hsa05210:Colorectal cancer	hsa00982:Drug metabolism	hsa00980:Metabolism of xenobiotics by cytochrome P450	hsa00980:Metabolism of xenobiotics by cytochrome P450	hsa05210:Colorectal cancer	hsa05215:Prostate cancer	hsa05210:Colorectal cancer	hsa04914:Progesterone-mediated oocyte maturation	hsa04914:Progesterone-mediated oocyte maturation	hsa04660:T cell receptor signaling pathway	hsa05223:Non-small cell lung cancer	hsa04914:Progesterone-mediated oocyte maturation	hsa05223:Non-small cell lung cancer	hsa05220:Chronic myeloid leukemia
hsa04664:Fc epsilon RI signaling pathway	hsa04660:T cell receptor signaling pathway	hsa00270:Cysteine and methionine metabolism	hsa04912:GnRH signaling pathway	hsa05200:Pathways in cancer		hsa04370:VEGF signaling pathway	hsa04910:Insulin signaling pathway	hsa04664:Fc epsilon RI signaling pathway	hsa04664:Fc epsilon RI signaling pathway	hsa04370:VEGF signaling pathway	hsa03320:PPAR signaling pathway	hsa00980:Metabolism of xenobiotics by cytochrome P450	hsa03320:PPAR signaling pathway	hsa00980:Metabolism of xenobiotics by cytochrome P450	hsa05210:Colorectal cancer	hsa05215:Prostate cancer	hsa00980:Metabolism of xenobiotics by cytochrome P450	hsa05212:Pancreatic cancer	hsa05212:Pancreatic cancer	hsa05212:Pancreatic cancer	hsa05215:Prostate cancer	hsa00982:Drug metabolism	hsa00982:Drug metabolism	hsa04914:Progesterone-mediated oocyte maturation	hsa00230:Purine metabolism	hsa05223:Non-small cell lung cancer	hsa05223:Non-small cell lung cancer	hsa04912:GnRH signaling pathway	hsa03320:PPAR signaling pathway	hsa03320:PPAR signaling pathway	hsa00230:Purine metabolism	hsa04660:T cell receptor signaling pathway	hsa05223:Non-small cell lung cancer
hsa00230:Purine metabolism	hsa00270:Cysteine and methionine metabolism	hsa05215:Prostate cancer	hsa05210:Colorectal cancer	hsa00620:Pyruvate metabolism		hsa04664:Fc epsilon RI signaling pathway	hsa00270:Cysteine and methionine metabolism	hsa04660:T cell receptor signaling pathway	hsa05223:Non-small cell lung cancer	hsa00480:Glutathione metabolism	hsa00982:Drug metabolism	hsa05223:Non-small cell lung cancer	hsa05210:Colorectal cancer	hsa04370:VEGF signaling pathway	hsa04914:Progesterone-mediated oocyte maturation	hsa00230:Purine metabolism	hsa05215:Prostate cancer	hsa04914:Progesterone-mediated oocyte maturation	hsa04520:Adherens junction	hsa04914:Progesterone-mediated oocyte maturation	hsa04664:Fc epsilon RI signaling pathway	hsa04660:T cell receptor signaling pathway	hsa05200:Pathways in cancer	hsa04012:ErbB signaling pathway	hsa00980:Metabolism of xenobiotics by cytochrome P450	hsa03320:PPAR signaling pathway	hsa00980:Metabolism of xenobiotics by cytochrome P450	hsa04920:Adipocytokine signaling pathway	hsa04914:Progesterone-mediated oocyte maturation	hsa05215:Prostate cancer	hsa04660:T cell receptor signaling pathway	hsa04910:Insulin signaling pathway	hsa05219:Bladder cancer
hsa00620:Pyruvate metabolism	hsa00670:One carbon pool by folate	hsa00920:Sulfur metabolism	hsa04920:Adipocytokine signaling pathway	hsa00980:Metabolism of xenobiotics by cytochrome P450		hsa04910:Insulin signaling pathway	hsa04614:Renin-angiotensin system	hsa05219:Bladder cancer	hsa05120:Epithelial cell signaling in Helicobacter pylori infection	hsa04664:Fc epsilon RI signaling pathway	hsa05215:Prostate cancer	hsa03320:PPAR signaling pathway	hsa04914:Progesterone-mediated oocyte maturation	hsa04664:Fc epsilon RI signaling pathway	hsa05211:Renal cell carcinoma	hsa05211:Renal cell carcinoma	hsa05120:Epithelial cell signaling in Helicobacter pylori infection	hsa04520:Adherens junction	hsa05223:Non-small cell lung cancer	hsa05219:Bladder cancer	hsa00230:Purine metabolism	hsa05200:Pathways in cancer	hsa00230:Purine metabolism	hsa05220:Chronic myeloid leukemia	hsa04664:Fc epsilon RI signaling pathway	hsa04914:Progesterone-mediated oocyte maturation	hsa05210:Colorectal cancer	hsa04510:Focal adhesion	hsa04370:VEGF signaling pathway	hsa04912:GnRH signaling pathway	hsa05223:Non-small cell lung cancer	hsa04012:ErbB signaling pathway	hsa05210:Colorectal cancer
hsa05210:Colorectal cancer	hsa05215:Prostate cancer	hsa04664:Fc epsilon RI signaling pathway	hsa04012:ErbB signaling pathway	hsa00330:Arginine and proline metabolism		hsa04660:T cell receptor signaling pathway	hsa04914:Progesterone-mediated oocyte maturation	hsa00520:Amino sugar and nucleotide sugar metabolism	hsa00270:Cysteine and methionine metabolism	hsa05223:Non-small cell lung cancer	hsa05223:Non-small cell lung cancer	hsa04914:Progesterone-mediated oocyte maturation	hsa04012:ErbB signaling pathway	hsa04660:T cell receptor signaling pathway	hsa04520:Adherens junction	hsa05210:Colorectal cancer	hsa03320:PPAR signaling pathway	hsa05219:Bladder cancer	hsa04912:GnRH signaling pathway	hsa04664:Fc epsilon RI signaling pathway	hsa05210:Colorectal cancer	hsa04914:Progesterone-mediated oocyte maturation	hsa04914:Progesterone-mediated oocyte maturation	hsa05223:Non-small cell lung cancer	hsa05223:Non-small cell lung cancer	hsa04012:ErbB signaling pathway	hsa04012:ErbB signaling pathway	hsa04012:ErbB signaling pathway	hsa05214:Glioma	hsa05213:Endometrial cancer	hsa00260:Glycine, serine and threonine metabolism	hsa05120:Epithelial cell signaling in Helicobacter pylori infection	hsa05211:Renal cell carcinoma
hsa05200:Pathways in cancer	hsa05210:Colorectal cancer	hsa00982:Drug metabolism	hsa03320:PPAR signaling pathway	hsa00051:Fructose and mannose metabolism		hsa04914:Progesterone-mediated oocyte maturation	hsa00620:Pyruvate metabolism	hsa05210:Colorectal cancer	hsa04912:GnRH signaling pathway	hsa03320:PPAR signaling pathway	hsa05211:Renal cell carcinoma	hsa04012:ErbB signaling pathway	hsa05221:Acute myeloid leukemia	hsa05120:Epithelial cell signaling in Helicobacter pylori infection	hsa04664:Fc epsilon RI signaling pathway	hsa00480:Glutathione metabolism	hsa04370:VEGF signaling pathway	hsa04510:Focal adhesion	hsa04012:ErbB signaling pathway	hsa03320:PPAR signaling pathway	hsa04914:Progesterone-mediated oocyte maturation	hsa05215:Prostate cancer	hsa05215:Prostate cancer	hsa04664:Fc epsilon RI signaling pathway	hsa04660:T cell receptor signaling pathway	hsa04660:T cell receptor signaling pathway	hsa04664:Fc epsilon RI signaling pathway	hsa05223:Non-small cell lung cancer	hsa04912:GnRH signaling pathway	hsa04914:Progesterone-mediated oocyte maturation	hsa00980:Metabolism of xenobiotics by cytochrome P450	hsa03320:PPAR signaling pathway	hsa05212:Pancreatic cancer
hsa04012:ErbB signaling pathway	hsa04914:Progesterone-mediated oocyte maturation	hsa00670:One carbon pool by folate	hsa00980:Metabolism of xenobiotics by cytochrome P450	hsa04370:VEGF signaling pathway		hsa04012:ErbB signaling pathway	hsa00520:Amino sugar and nucleotide sugar metabolism	hsa04012:ErbB signaling pathway	hsa05210:Colorectal cancer	hsa05212:Pancreatic cancer	hsa05210:Colorectal cancer	hsa05212:Pancreatic cancer	hsa04660:T cell receptor signaling pathway	hsa04912:GnRH signaling pathway	hsa04510:Focal adhesion	hsa04914:Progesterone-mediated oocyte maturation	hsa04520:Adherens junction	hsa04012:ErbB signaling pathway	hsa03320:PPAR signaling pathway	hsa04912:GnRH signaling pathway	hsa00480:Glutathione metabolism	hsa04722:Neurotrophin signaling pathway	hsa04664:Fc epsilon RI signaling pathway	hsa05221:Acute myeloid leukemia	hsa03320:PPAR signaling pathway	hsa05221:Acute myeloid leukemia	hsa05221:Acute myeloid leukemia	hsa00980:Metabolism of xenobiotics by cytochrome P450	hsa05213:Endometrial cancer	hsa05211:Renal cell carcinoma	hsa05212:Pancreatic cancer	hsa04370:VEGF signaling pathway	hsa04370:VEGF signaling pathway
hsa05223:Non-small cell lung cancer	hsa05200:Pathways in cancer	hsa04610:Complement and coagulation cascades	hsa04722:Neurotrophin signaling pathway	hsa00010:Glycolysis / Gluconeogenesis		hsa05211:Renal cell carcinoma	hsa05210:Colorectal cancer	hsa00230:Purine metabolism	hsa04370:VEGF signaling pathway	hsa04660:T cell receptor signaling pathway	hsa04912:GnRH signaling pathway	hsa00982:Drug metabolism	hsa00982:Drug metabolism	hsa04012:ErbB signaling pathway	hsa00982:Drug metabolism	hsa04510:Focal adhesion	hsa00982:Drug metabolism	hsa00980:Metabolism of xenobiotics by cytochrome P450	hsa05218:Melanoma	hsa00980:Metabolism of xenobiotics by cytochrome P450	hsa04012:ErbB signaling pathway	hsa04520:Adherens junction	hsa00670:One carbon pool by folate	hsa04510:Focal adhesion	hsa00982:Drug metabolism	hsa00980:Metabolism of xenobiotics by cytochrome P450	hsa05218:Melanoma	hsa04722:Neurotrophin signaling pathway	hsa04012:ErbB signaling pathway	hsa04660:T cell receptor signaling pathway	hsa05210:Colorectal cancer	hsa04510:Focal adhesion	hsa04722:Neurotrophin signaling pathway
hsa04510:Focal adhesion	hsa04510:Focal adhesion	hsa04614:Renin-angiotensin system	hsa04660:T cell receptor signaling pathway	hsa00982:Drug metabolism		hsa00980:Metabolism of xenobiotics by cytochrome P450	hsa05212:Pancreatic cancer	hsa05213:Endometrial cancer	hsa04520:Adherens junction	hsa05213:Endometrial cancer	hsa00480:Glutathione metabolism	hsa04912:GnRH signaling pathway	hsa04664:Fc epsilon RI signaling pathway	hsa00982:Drug metabolism	hsa04912:GnRH signaling pathway	hsa00620:Pyruvate metabolism	hsa04664:Fc epsilon RI signaling pathway	hsa04370:VEGF signaling pathway	hsa04510:Focal adhesion	hsa04012:ErbB signaling pathway	hsa05200:Pathways in cancer	hsa05120:Epithelial cell signaling in Helicobacter pylori infection	hsa05014:Amyotrophic lateral sclerosis (ALS)	hsa05120:Epithelial cell signaling in Helicobacter pylori infection	hsa00480:Glutathione metabolism	hsa04664:Fc epsilon RI signaling pathway	hsa04510:Focal adhesion	hsa04660:T cell receptor signaling pathway	hsa05218:Melanoma	hsa05219:Bladder cancer	hsa00982:Drug metabolism	hsa00140:Steroid hormone biosynthesis	hsa04660:T cell receptor signaling pathway
hsa05211:Renal cell carcinoma	hsa05213:Endometrial cancer	hsa00330:Arginine and proline metabolism	hsa05120:Epithelial cell signaling in Helicobacter pylori infection	hsa05215:Prostate cancer		hsa05219:Bladder cancer	hsa05200:Pathways in cancer	hsa00330:Arginine and proline metabolism	hsa04660:T cell receptor signaling pathway	hsa05222:Small cell lung cancer	hsa05213:Endometrial cancer	hsa05213:Endometrial cancer	hsa04912:GnRH signaling pathway	hsa05219:Bladder cancer	hsa04920:Adipocytokine signaling pathway	hsa04012:ErbB signaling pathway	hsa05213:Endometrial cancer	hsa04660:T cell receptor signaling pathway	hsa05220:Chronic myeloid leukemia	hsa04370:VEGF signaling pathway	hsa04510:Focal adhesion	hsa04510:Focal adhesion	hsa04722:Neurotrophin signaling pathway	hsa05212:Pancreatic cancer	hsa05213:Endometrial cancer	hsa04722:Neurotrophin signaling pathway	hsa04912:GnRH signaling pathway	hsa04114:Oocyte meiosis	hsa05220:Chronic myeloid leukemia	hsa04370:VEGF signaling pathway	hsa05213:Endometrial cancer	hsa04722:Neurotrophin signaling pathway	hsa04664:Fc epsilon RI signaling pathway
hsa00010:Glycolysis / Gluconeogenesis	hsa04912:GnRH signaling pathway	hsa04660:T cell receptor signaling pathway	hsa05220:Chronic myeloid leukemia	hsa04510:Focal adhesion		hsa05213:Endometrial cancer	hsa04012:ErbB signaling pathway	hsa04912:GnRH signaling pathway	hsa04722:Neurotrophin signaling pathway	hsa04914:Progesterone-mediated oocyte maturation	hsa04660:T cell receptor signaling pathway	hsa04920:Adipocytokine signaling pathway	hsa05213:Endometrial cancer	hsa05210:Colorectal cancer	hsa05120:Epithelial cell signaling in Helicobacter pylori infection	hsa05213:Endometrial cancer	hsa00230:Purine metabolism	hsa04664:Fc epsilon RI signaling pathway	hsa04664:Fc epsilon RI signaling pathway	hsa00520:Amino sugar and nucleotide sugar metabolism	hsa00010:Glycolysis / Gluconeogenesis	hsa04062:Chemokine signaling pathway	hsa00010:Glycolysis / Gluconeogenesis	hsa04912:GnRH signaling pathway	hsa05211:Renal cell carcinoma	hsa05213:Endometrial cancer	hsa05213:Endometrial cancer	hsa05120:Epithelial cell signaling in Helicobacter pylori infection	hsa05216:Thyroid cancer	hsa05221:Acute myeloid leukemia	hsa04012:ErbB signaling pathway	hsa05218:Melanoma	hsa05213:Endometrial cancer
hsa00480:Glutathione metabolism	hsa05120:Epithelial cell signaling in Helicobacter pylori infection	hsa00760:Nicotinate and nicotinamide metabolism	hsa04664:Fc epsilon RI signaling pathway	hsa05120:Epithelial cell signaling in Helicobacter pylori infection		hsa05220:Chronic myeloid leukemia	hsa00760:Nicotinate and nicotinamide metabolism	hsa05211:Renal cell carcinoma	hsa03320:PPAR signaling pathway	hsa05211:Renal cell carcinoma	hsa05120:Epithelial cell signaling in Helicobacter pylori infection	hsa05120:Epithelial cell signaling in Helicobacter pylori infection	hsa05218:Melanoma	hsa04510:Focal adhesion	hsa04660:T cell receptor signaling pathway	hsa04664:Fc epsilon RI signaling pathway	hsa05222:Small cell lung cancer	hsa05213:Endometrial cancer	hsa04960:Aldosterone-regulated sodium reabsorption	hsa05120:Epithelial cell signaling in Helicobacter pylori infection	hsa00380:Tryptophan metabolism	hsa04012:ErbB signaling pathway	hsa00270:Cysteine and methionine metabolism	hsa04520:Adherens junction	hsa05210:Colorectal cancer	hsa05220:Chronic myeloid leukemia	hsa04520:Adherens junction	hsa03320:PPAR signaling pathway	hsa04510:Focal adhesion	hsa05210:Colorectal cancer	hsa04664:Fc epsilon RI signaling pathway	hsa05212:Pancreatic cancer	hsa04914:Progesterone-mediated oocyte maturation
hsa00380:Tryptophan metabolism	hsa00620:Pyruvate metabolism	hsa04914:Progesterone-mediated oocyte maturation	hsa05214:Glioma	hsa05211:Renal cell carcinoma		hsa04510:Focal adhesion	hsa05215:Prostate cancer	hsa04914:Progesterone-mediated oocyte maturation	hsa04510:Focal adhesion	hsa05221:Acute myeloid leukemia	hsa05221:Acute myeloid leukemia	hsa04510:Focal adhesion	hsa05219:Bladder cancer	hsa04722:Neurotrophin signaling pathway	hsa05223:Non-small cell lung cancer	hsa05223:Non-small cell lung cancer	hsa04914:Progesterone-mediated oocyte maturation	hsa05223:Non-small cell lung cancer	hsa04114:Oocyte meiosis	hsa05221:Acute myeloid leukemia	hsa00620:Pyruvate metabolism	hsa00330:Arginine and proline metabolism	hsa00920:Sulfur metabolism	hsa04614:Renin-angiotensin system	hsa05222:Small cell lung cancer	hsa04370:VEGF signaling pathway	hsa05219:Bladder cancer	hsa05220:Chronic myeloid leukemia	hsa00980:Metabolism of xenobiotics by cytochrome P450	hsa04722:Neurotrophin signaling pathway	hsa05211:Renal cell carcinoma	hsa04912:GnRH signaling pathway	hsa05221:Acute myeloid leukemia
hsa04914:Progesterone-mediated oocyte maturation	hsa05223:Non-small cell lung cancer	hsa04012:ErbB signaling pathway	hsa00140:Steroid hormone biosynthesis	hsa00920:Sulfur metabolism		hsa04722:Neurotrophin signaling pathway	hsa00670:One carbon pool by folate	hsa05221:Acute myeloid leukemia	hsa04914:Progesterone-mediated oocyte maturation	hsa05220:Chronic myeloid leukemia	hsa04914:Progesterone-mediated oocyte maturation	hsa05221:Acute myeloid leukemia	hsa05216:Thyroid cancer	hsa00480:Glutathione metabolism	hsa04370:VEGF signaling pathway	hsa00010:Glycolysis / Gluconeogenesis	hsa04012:ErbB signaling pathway	hsa05120:Epithelial cell signaling in Helicobacter pylori infection	hsa05214:Glioma	hsa05218:Melanoma	hsa05213:Endometrial cancer	hsa00760:Nicotinate and nicotinamide metabolism	hsa00760:Nicotinate and nicotinamide metabolism	hsa04660:T cell receptor signaling pathway	hsa05221:Acute myeloid leukemia	hsa05216:Thyroid cancer	hsa04660:T cell receptor signaling pathway	hsa04370:VEGF signaling pathway	hsa00140:Steroid hormone biosynthesis	hsa04920:Adipocytokine signaling pathway	hsa00480:Glutathione metabolism	hsa05220:Chronic myeloid leukemia	hsa04912:GnRH signaling pathway
hsa05213:Endometrial cancer	hsa05211:Renal cell carcinoma	hsa05120:Epithelial cell signaling in Helicobacter pylori infection	hsa05218:Melanoma	hsa04520:Adherens junction		hsa00480:Glutathione metabolism	hsa04664:Fc epsilon RI signaling pathway	hsa00980:Metabolism of xenobiotics by cytochrome P450	hsa04012:ErbB signaling pathway	hsa04662:B cell receptor signaling pathway	hsa04510:Focal adhesion	hsa04660:T cell receptor signaling pathway	hsa05220:Chronic myeloid leukemia	hsa00670:One carbon pool by folate	hsa05219:Bladder cancer	hsa04520:Adherens junction	hsa04510:Focal adhesion	hsa05211:Renal cell carcinoma	hsa04920:Adipocytokine signaling pathway	hsa05220:Chronic myeloid leukemia	hsa04722:Neurotrophin signaling pathway	hsa05212:Pancreatic cancer	hsa04012:ErbB signaling pathway	hsa05222:Small cell lung cancer	hsa05212:Pancreatic cancer	hsa00982:Drug metabolism	hsa04722:Neurotrophin signaling pathway	hsa04520:Adherens junction	hsa05222:Small cell lung cancer	hsa00480:Glutathione metabolism	hsa00620:Pyruvate metabolism	hsa05213:Endometrial cancer	hsa04920:Adipocytokine signaling pathway
hsa04614:Renin-angiotensin system	hsa04012:ErbB signaling pathway	hsa05211:Renal cell carcinoma	hsa05213:Endometrial cancer	hsa00260:Glycine, serine and threonine metabolism		hsa05218:Melanoma	hsa00240:Pyrimidine metabolism	hsa00010:Glycolysis / Gluconeogenesis	hsa00982:Drug metabolism	hsa04510:Focal adhesion	hsa05212:Pancreatic cancer	hsa04370:VEGF signaling pathway	hsa04370:VEGF signaling pathway	hsa05213:Endometrial cancer	hsa04722:Neurotrophin signaling pathway	hsa04660:T cell receptor signaling pathway	hsa04722:Neurotrophin signaling pathway	hsa05221:Acute myeloid leukemia	hsa00140:Steroid hormone biosynthesis	hsa05214:Glioma	hsa05120:Epithelial cell signaling in Helicobacter pylori infection	hsa05219:Bladder cancer	hsa05212:Pancreatic cancer	hsa04621:NOD-like receptor signaling pathway	hsa04722:Neurotrophin signaling pathway	hsa05214:Glioma	hsa05211:Renal cell carcinoma	hsa04664:Fc epsilon RI signaling pathway	hsa05210:Colorectal cancer	hsa04664:Fc epsilon RI signaling pathway	hsa04722:Neurotrophin signaling pathway	hsa04520:Adherens junction	hsa00670:One carbon pool by folate
hsa05218:Melanoma	hsa05212:Pancreatic cancer	hsa04510:Focal adhesion	hsa05212:Pancreatic cancer	hsa05014:Amyotrophic lateral sclerosis (ALS)		hsa05214:Glioma	hsa00330:Arginine and proline metabolism	hsa04662:B cell receptor signaling pathway	hsa00480:Glutathione metabolism	hsa05210:Colorectal cancer	hsa04012:ErbB signaling pathway	hsa04662:B cell receptor signaling pathway	hsa04520:Adherens junction	hsa05223:Non-small cell lung cancer	hsa00140:Steroid hormone biosynthesis	hsa04722:Neurotrophin signaling pathway	hsa05221:Acute myeloid leukemia	hsa05220:Chronic myeloid leukemia	hsa04930:Type II diabetes mellitus	hsa04520:Adherens junction	hsa04912:GnRH signaling pathway	hsa00240:Pyrimidine metabolism	hsa00520:Amino sugar and nucleotide sugar metabolism	hsa04722:Neurotrophin signaling pathway	hsa04614:Renin-angiotensin system	hsa04510:Focal adhesion	hsa00982:Drug metabolism	hsa04010:MAPK signaling pathway	hsa04722:Neurotrophin signaling pathway	hsa00010:Glycolysis / Gluconeogenesis	hsa04510:Focal adhesion	hsa04664:Fc epsilon RI signaling pathway	hsa04510:Focal adhesion
hsa04722:Neurotrophin signaling pathway	hsa04722:Neurotrophin signaling pathway	hsa00240:Pyrimidine metabolism	hsa04510:Focal adhesion	hsa04664:Fc epsilon RI signaling pathway		hsa05120:Epithelial cell signaling in Helicobacter pylori infection	hsa05120:Epithelial cell signaling in Helicobacter pylori infection	hsa04722:Neurotrophin signaling pathway	hsa05213:Endometrial cancer	hsa05120:Epithelial cell signaling in Helicobacter pylori infection	hsa04520:Adherens junction	hsa04930:Type II diabetes mellitus	hsa00140:Steroid hormone biosynthesis	hsa05211:Renal cell carcinoma	hsa00670:One carbon pool by folate	hsa00240:Pyrimidine metabolism	hsa00270:Cysteine and methionine metabolism	hsa04722:Neurotrophin signaling pathway	hsa04722:Neurotrophin signaling pathway	hsa05213:Endometrial cancer	hsa05222:Small cell lung cancer	hsa04664:Fc epsilon RI signaling pathway	hsa05210:Colorectal cancer	hsa04920:Adipocytokine signaling pathway	hsa05014:Amyotrophic lateral sclerosis (ALS)	hsa04920:Adipocytokine signaling pathway	hsa05214:Glioma	hsa05219:Bladder cancer	hsa05211:Renal cell carcinoma	hsa05216:Thyroid cancer	hsa05218:Melanoma	hsa05222:Small cell lung cancer	hsa04012:ErbB signaling pathway
hsa05212:Pancreatic cancer	hsa00520:Amino sugar and nucleotide sugar metabolism	hsa05212:Pancreatic cancer	hsa04370:VEGF signaling pathway	hsa05223:Non-small cell lung cancer		hsa03320:PPAR signaling pathway	hsa00010:Glycolysis / Gluconeogenesis	hsa04510:Focal adhesion	hsa05014:Amyotrophic lateral sclerosis (ALS)	hsa04722:Neurotrophin signaling pathway	hsa04722:Neurotrophin signaling pathway	hsa00270:Cysteine and methionine metabolism	hsa05214:Glioma	hsa05218:Melanoma	hsa04114:Oocyte meiosis	hsa00983:Drug metabolism	hsa04912:GnRH signaling pathway	hsa04912:GnRH signaling pathway	hsa05213:Endometrial cancer	hsa04660:T cell receptor signaling pathway	hsa05211:Renal cell carcinoma	hsa00520:Amino sugar and nucleotide sugar metabolism	hsa05222:Small cell lung cancer	hsa00140:Steroid hormone biosynthesis	hsa04012:ErbB signaling pathway	hsa05120:Epithelial cell signaling in Helicobacter pylori infection	hsa00620:Pyruvate metabolism	hsa00982:Drug metabolism	hsa04114:Oocyte meiosis	hsa04510:Focal adhesion	hsa05222:Small cell lung cancer	hsa00980:Metabolism of xenobiotics by cytochrome P450	hsa05216:Thyroid cancer
hsa04662:B cell receptor signaling pathway	hsa00980:Metabolism of xenobiotics by cytochrome P450	hsa04912:GnRH signaling pathway	hsa04520:Adherens junction			hsa05221:Acute myeloid leukemia	hsa04722:Neurotrophin signaling pathway	hsa00620:Pyruvate metabolism	hsa05222:Small cell lung cancer	hsa04012:ErbB signaling pathway	hsa05218:Melanoma	hsa00480:Glutathione metabolism	hsa04510:Focal adhesion	hsa00520:Amino sugar and nucleotide sugar metabolism	hsa05213:Endometrial cancer	hsa05120:Epithelial cell signaling in Helicobacter pylori infection	hsa00480:Glutathione metabolism	hsa04614:Renin-angiotensin system	hsa04370:VEGF signaling pathway	hsa04722:Neurotrophin signaling pathway	hsa05221:Acute myeloid leukemia	hsa04912:GnRH signaling pathway	hsa05120:Epithelial cell signaling in Helicobacter pylori infection	hsa04930:Type II diabetes mellitus	hsa05220:Chronic myeloid leukemia	hsa05218:Melanoma	hsa05120:Epithelial cell signaling in Helicobacter pylori infection	hsa04621:NOD-like receptor signaling pathway	hsa04650:Natural killer cell mediated cytotoxicity	hsa04930:Type II diabetes mellitus	hsa05220:Chronic myeloid leukemia	hsa04960:Aldosterone-regulated sodium reabsorption	hsa04662:B cell receptor signaling pathway
hsa04520:Adherens junction	hsa00982:Drug metabolism	hsa04722:Neurotrophin signaling pathway	hsa05221:Acute myeloid leukemia			hsa05222:Small cell lung cancer	hsa04660:T cell receptor signaling pathway	hsa05120:Epithelial cell signaling in Helicobacter pylori infection	hsa05211:Renal cell carcinoma	hsa05014:Amyotrophic lateral sclerosis (ALS)	hsa04010:MAPK signaling pathway	hsa04722:Neurotrophin signaling pathway	hsa04662:B cell receptor signaling pathway	hsa04662:B cell receptor signaling pathway	hsa05212:Pancreatic cancer	hsa03320:PPAR signaling pathway	hsa04920:Adipocytokine signaling pathway	hsa05218:Melanoma	hsa00980:Metabolism of xenobiotics by cytochrome P450	hsa05211:Renal cell carcinoma	hsa04660:T cell receptor signaling pathway	hsa00670:One carbon pool by folate	hsa04610:Complement and coagulation cascades	hsa04370:VEGF signaling pathway	hsa04662:B cell receptor signaling pathway	hsa05212:Pancreatic cancer	hsa03320:PPAR signaling pathway	hsa05214:Glioma	hsa00380:Tryptophan metabolism	hsa04012:ErbB signaling pathway	hsa05214:Glioma	hsa04650:Natural killer cell mediated cytotoxicity	hsa00980:Metabolism of xenobiotics by cytochrome P450
hsa04660:T cell receptor signaling pathway	hsa00240:Pyrimidine metabolism	hsa04662:B cell receptor signaling pathway	hsa00982:Drug metabolism			hsa00982:Drug metabolism	hsa04520:Adherens junction	hsa03320:PPAR signaling pathway	hsa05219:Bladder cancer	hsa04062:Chemokine signaling pathway	hsa04662:B cell receptor signaling pathway	hsa05211:Renal cell carcinoma	hsa04722:Neurotrophin signaling pathway	hsa04520:Adherens junction	hsa05014:Amyotrophic lateral sclerosis (ALS)	hsa04912:GnRH signaling pathway	hsa05211:Renal cell carcinoma	hsa05216:Thyroid cancer	hsa04621:NOD-like receptor signaling pathway	hsa04510:Focal adhesion	hsa05014:Amyotrophic lateral sclerosis (ALS)	hsa04621:NOD-like receptor signaling pathway	hsa05213:Endometrial cancer	hsa05213:Endometrial cancer	hsa04621:NOD-like receptor signaling pathway	hsa04520:Adherens junction	hsa05212:Pancreatic cancer	hsa05211:Renal cell carcinoma	hsa05221:Acute myeloid leukemia	hsa00260:Glycine, serine and threonine metabolism	hsa04520:Adherens junction	hsa00590:Arachidonic acid metabolism	hsa04650:Natural killer cell mediated cytotoxicity
hsa05120:Epithelial cell signaling in Helicobacter pylori infection	hsa00760:Nicotinate and nicotinamide metabolism	hsa00260:Glycine, serine and threonine metabolism	hsa04621:NOD-like receptor signaling pathway			hsa04912:GnRH signaling pathway	hsa00920:Sulfur metabolism	hsa05218:Melanoma	hsa05221:Acute myeloid leukemia	hsa00983:Drug metabolism	hsa05222:Small cell lung cancer	hsa05220:Chronic myeloid leukemia	hsa00670:One carbon pool by folate	hsa04621:NOD-like receptor signaling pathway	hsa04662:B cell receptor signaling pathway	hsa05218:Melanoma	hsa05218:Melanoma	hsa04062:Chemokine signaling pathway	hsa05120:Epithelial cell signaling in Helicobacter pylori infection	hsa04930:Type II diabetes mellitus	hsa05218:Melanoma	hsa05210:Colorectal cancer	hsa00330:Arginine and proline metabolism	hsa05216:Thyroid cancer	hsa04510:Focal adhesion	hsa04960:Aldosterone-regulated sodium reabsorption	hsa04662:B cell receptor signaling pathway	hsa05218:Melanoma	hsa04520:Adherens junction	hsa05120:Epithelial cell signaling in Helicobacter pylori infection	hsa05014:Amyotrophic lateral sclerosis (ALS)	hsa04010:MAPK signaling pathway	hsa00982:Drug metabolism
hsa00520:Amino sugar and nucleotide sugar metabolism	hsa05014:Amyotrophic lateral sclerosis (ALS)	hsa05213:Endometrial cancer	hsa04010:MAPK signaling pathway			hsa04662:B cell receptor signaling pathway	hsa04912:GnRH signaling pathway	hsa05212:Pancreatic cancer	hsa05220:Chronic myeloid leukemia	hsa05216:Thyroid cancer	hsa05014:Amyotrophic lateral sclerosis (ALS)	hsa00500:Starch and sucrose metabolism	hsa00260:Glycine, serine and threonine metabolism	hsa00270:Cysteine and methionine metabolism	hsa00590:Arachidonic acid metabolism	hsa00270:Cysteine and methionine metabolism	hsa04660:T cell receptor signaling pathway	hsa00140:Steroid hormone biosynthesis	hsa04620:Toll-like receptor signaling pathway	hsa04662:B cell receptor signaling pathway	hsa05212:Pancreatic cancer	hsa05213:Endometrial cancer	hsa04510:Focal adhesion	hsa04010:MAPK signaling pathway	hsa04062:Chemokine signaling pathway	hsa05219:Bladder cancer	hsa05220:Chronic myeloid leukemia	hsa05212:Pancreatic cancer	hsa04960:Aldosterone-regulated sodium reabsorption	hsa04062:Chemokine signaling pathway	hsa00330:Arginine and proline metabolism	hsa04110:Cell cycle	hsa05214:Glioma
hsa04610:Complement and coagulation cascades	hsa05219:Bladder cancer	hsa05200:Pathways in cancer	hsa04650:Natural killer cell mediated cytotoxicity			hsa04520:Adherens junction	hsa05213:Endometrial cancer	hsa05220:Chronic myeloid leukemia	hsa00140:Steroid hormone biosynthesis	hsa04912:GnRH signaling pathway	hsa04610:Complement and coagulation cascades	hsa05219:Bladder cancer	hsa04614:Renin-angiotensin system	hsa05214:Glioma	hsa05221:Acute myeloid leukemia	hsa00760:Nicotinate and nicotinamide metabolism	hsa04662:B cell receptor signaling pathway	hsa04621:NOD-like receptor signaling pathway	hsa05216:Thyroid cancer	hsa00982:Drug metabolism	hsa00520:Amino sugar and nucleotide sugar metabolism	hsa05014:Amyotrophic lateral sclerosis (ALS)	hsa05220:Chronic myeloid leukemia	hsa00980:Metabolism of xenobiotics by cytochrome P450	hsa04912:GnRH signaling pathway	hsa04650:Natural killer cell mediated cytotoxicity	hsa04614:Renin-angiotensin system	hsa05213:Endometrial cancer	hsa04664:Fc epsilon RI signaling pathway	hsa05212:Pancreatic cancer	hsa05120:Epithelial cell signaling in Helicobacter pylori infection	hsa04621:NOD-like receptor signaling pathway	hsa05222:Small cell lung cancer
hsa00270:Cysteine and methionine metabolism	hsa05221:Acute myeloid leukemia		hsa04114:Oocyte meiosis			hsa00270:Cysteine and methionine metabolism	hsa05014:Amyotrophic lateral sclerosis (ALS)	hsa04930:Type II diabetes mellitus	hsa04010:MAPK signaling pathway	hsa05214:Glioma	hsa00620:Pyruvate metabolism	hsa00230:Purine metabolism	hsa04920:Adipocytokine signaling pathway	hsa04062:Chemokine signaling pathway	hsa00010:Glycolysis / Gluconeogenesis	hsa04614:Renin-angiotensin system	hsa05220:Chronic myeloid leukemia	hsa00982:Drug metabolism	hsa04660:T cell receptor signaling pathway	hsa00670:One carbon pool by folate	hsa04662:B cell receptor signaling pathway	hsa00380:Tryptophan metabolism	hsa04662:B cell receptor signaling pathway	hsa04110:Cell cycle	hsa04620:Toll-like receptor signaling pathway	hsa04010:MAPK signaling pathway	hsa05014:Amyotrophic lateral sclerosis (ALS)	hsa04650:Natural killer cell mediated cytotoxicity	hsa00982:Drug metabolism	hsa05220:Chronic myeloid leukemia	hsa00240:Pyrimidine metabolism	hsa00982:Drug metabolism	hsa05120:Epithelial cell signaling in Helicobacter pylori infection
hsa00760:Nicotinate and nicotinamide metabolism	hsa04662:B cell receptor signaling pathway		hsa05219:Bladder cancer			hsa04062:Chemokine signaling pathway	hsa04610:Complement and coagulation cascades	hsa00982:Drug metabolism	hsa00230:Purine metabolism	hsa04920:Adipocytokine signaling pathway	hsa05219:Bladder cancer	hsa04520:Adherens junction	hsa05120:Epithelial cell signaling in Helicobacter pylori infection	hsa05014:Amyotrophic lateral sclerosis (ALS)	hsa04621:NOD-like receptor signaling pathway	hsa00380:Tryptophan metabolism	hsa05219:Bladder cancer	hsa04930:Type II diabetes mellitus	hsa05222:Small cell lung cancer	hsa05216:Thyroid cancer	hsa04930:Type II diabetes mellitus	hsa00010:Glycolysis / Gluconeogenesis	hsa00240:Pyrimidine metabolism	hsa04960:Aldosterone-regulated sodium reabsorption	hsa00620:Pyruvate metabolism	hsa04114:Oocyte meiosis	hsa05216:Thyroid cancer	hsa05221:Acute myeloid leukemia	hsa00670:One carbon pool by folate	hsa00620:Pyruvate metabolism	hsa00760:Nicotinate and nicotinamide metabolism	hsa05214:Glioma	hsa05014:Amyotrophic lateral sclerosis (ALS)
hsa04912:GnRH signaling pathway	hsa04520:Adherens junction		hsa04062:Chemokine signaling pathway			hsa00983:Drug metabolism	hsa05223:Non-small cell lung cancer	hsa00270:Cysteine and methionine metabolism	hsa00670:One carbon pool by folate	hsa04210:Apoptosis	hsa00670:One carbon pool by folate	hsa00520:Amino sugar and nucleotide sugar metabolism	hsa04114:Oocyte meiosis	hsa03320:PPAR signaling pathway	hsa05214:Glioma	hsa05219:Bladder cancer	hsa00240:Pyrimidine metabolism	hsa05214:Glioma	hsa05221:Acute myeloid leukemia	hsa00230:Purine metabolism	hsa04520:Adherens junction	hsa00500:Starch and sucrose metabolism	hsa05221:Acute myeloid leukemia	hsa05211:Renal cell carcinoma	hsa04210:Apoptosis	hsa04930:Type II diabetes mellitus	hsa04062:Chemokine signaling pathway	hsa04320:Dorso-ventral axis formation	hsa05120:Epithelial cell signaling in Helicobacter pylori infection	hsa04960:Aldosterone-regulated sodium reabsorption	hsa04912:GnRH signaling pathway	hsa00150:Androgen and estrogen metabolism	hsa04520:Adherens junction
hsa05221:Acute myeloid leukemia	hsa04621:NOD-like receptor signaling pathway		hsa05211:Renal cell carcinoma			hsa00230:Purine metabolism	hsa05211:Renal cell carcinoma	hsa05214:Glioma	hsa04662:B cell receptor signaling pathway	hsa00230:Purine metabolism	hsa05220:Chronic myeloid leukemia	hsa00670:One carbon pool by folate	hsa00480:Glutathione metabolism	hsa05212:Pancreatic cancer	hsa04650:Natural killer cell mediated cytotoxicity	hsa00260:Glycine, serine and threonine metabolism	hsa00520:Amino sugar and nucleotide sugar metabolism	hsa04920:Adipocytokine signaling pathway	hsa00982:Drug metabolism	hsa00140:Steroid hormone biosynthesis	hsa00051:Fructose and mannose metabolism	hsa00983:Drug metabolism	hsa04912:GnRH signaling pathway	hsa05218:Melanoma	hsa05218:Melanoma	hsa05211:Renal cell carcinoma	hsa00230:Purine metabolism	hsa00140:Steroid hormone biosynthesis	hsa00480:Glutathione metabolism	hsa05222:Small cell lung cancer	hsa00670:One carbon pool by folate	hsa04920:Adipocytokine signaling pathway	hsa04062:Chemokine signaling pathway
hsa05214:Glioma	hsa05214:Glioma		hsa04320:Dorso-ventral axis formation			hsa04930:Type II diabetes mellitus	hsa05219:Bladder cancer	hsa00480:Glutathione metabolism	hsa04062:Chemokine signaling pathway	hsa05218:Melanoma	hsa05216:Thyroid cancer	hsa05222:Small cell lung cancer	hsa05211:Renal cell carcinoma	hsa00500:Starch and sucrose metabolism	hsa04012:ErbB signaling pathway	hsa00520:Amino sugar and nucleotide sugar metabolism	hsa04930:Type II diabetes mellitus	hsa00620:Pyruvate metabolism	hsa04010:MAPK signaling pathway	hsa04621:NOD-like receptor signaling pathway	hsa00920:Sulfur metabolism		hsa00500:Starch and sucrose metabolism	hsa04662:B cell receptor signaling pathway	hsa05216:Thyroid cancer	hsa04662:B cell receptor signaling pathway	hsa00010:Glycolysis / Gluconeogenesis	hsa00480:Glutathione metabolism	hsa04662:B cell receptor signaling pathway	hsa05214:Glioma	hsa00010:Glycolysis / Gluconeogenesis	hsa05211:Renal cell carcinoma	hsa04614:Renin-angiotensin system
hsa04062:Chemokine signaling pathway	hsa00051:Fructose and mannose metabolism		hsa04662:B cell receptor signaling pathway			hsa04614:Renin-angiotensin system	hsa04510:Focal adhesion	hsa05222:Small cell lung cancer	hsa00520:Amino sugar and nucleotide sugar metabolism	hsa04520:Adherens junction	hsa00260:Glycine, serine and threonine metabolism	hsa05340:Primary immunodeficiency	hsa00270:Cysteine and methionine metabolism	hsa05221:Acute myeloid leukemia	hsa04062:Chemokine signaling pathway	hsa05212:Pancreatic cancer	hsa05340:Primary immunodeficiency	hsa04960:Aldosterone-regulated sodium reabsorption	hsa04110:Cell cycle	hsa04144:Endocytosis	hsa05214:Glioma				hsa00240:Pyrimidine metabolism	hsa04621:NOD-like receptor signaling pathway	hsa00140:Steroid hormone biosynthesis	hsa05216:Thyroid cancer	hsa00150:Androgen and estrogen metabolism	hsa04720:Long-term potentiation	hsa04662:B cell receptor signaling pathway	hsa04810:Regulation of actin cytoskeleton	hsa04010:MAPK signaling pathway
hsa05014:Amyotrophic lateral sclerosis (ALS)	hsa05218:Melanoma		hsa05216:Thyroid cancer			hsa00620:Pyruvate metabolism	hsa00983:Drug metabolism	hsa05014:Amyotrophic lateral sclerosis (ALS)	hsa00260:Glycine, serine and threonine metabolism	hsa00620:Pyruvate metabolism	hsa00140:Steroid hormone biosynthesis	hsa05218:Melanoma	hsa05212:Pancreatic cancer	hsa00240:Pyrimidine metabolism	hsa00920:Sulfur metabolism	hsa05221:Acute myeloid leukemia	hsa04010:MAPK signaling pathway	hsa04662:B cell receptor signaling pathway	hsa00150:Androgen and estrogen metabolism	hsa04062:Chemokine signaling pathway	hsa00240:Pyrimidine metabolism				hsa05214:Glioma	hsa04540:Gap junction	hsa00920:Sulfur metabolism	hsa04270:Vascular smooth muscle contraction	hsa00620:Pyruvate metabolism		hsa00380:Tryptophan metabolism	hsa05219:Bladder cancer	hsa00230:Purine metabolism
hsa00330:Arginine and proline metabolism	hsa04010:MAPK signaling pathway		hsa04270:Vascular smooth muscle contraction			hsa05216:Thyroid cancer	hsa00260:Glycine, serine and threonine metabolism	hsa00052:Galactose metabolism	hsa04621:NOD-like receptor signaling pathway	hsa00010:Glycolysis / Gluconeogenesis	hsa00270:Cysteine and methionine metabolism	hsa04010:MAPK signaling pathway	hsa05340:Primary immunodeficiency	hsa04614:Renin-angiotensin system	hsa04930:Type II diabetes mellitus	hsa04662:B cell receptor signaling pathway	hsa00330:Arginine and proline metabolism	hsa00983:Drug metabolism	hsa04614:Renin-angiotensin system	hsa00480:Glutathione metabolism	hsa00760:Nicotinate and nicotinamide metabolism				hsa00051:Fructose and mannose metabolism	hsa04320:Dorso-ventral axis formation	hsa04144:Endocytosis	hsa05222:Small cell lung cancer	hsa00071:Fatty acid metabolism		hsa04062:Chemokine signaling pathway	hsa04144:Endocytosis	hsa04150:mTOR signaling pathway
hsa00240:Pyrimidine metabolism			hsa05222:Small cell lung cancer			hsa05014:Amyotrophic lateral sclerosis (ALS)		hsa00670:One carbon pool by folate	hsa05340:Primary immunodeficiency	hsa04620:Toll-like receptor signaling pathway	hsa04920:Adipocytokine signaling pathway	hsa00330:Arginine and proline metabolism	hsa04010:MAPK signaling pathway	hsa05340:Primary immunodeficiency	hsa04610:Complement and coagulation cascades	hsa00920:Sulfur metabolism	hsa05014:Amyotrophic lateral sclerosis (ALS)	hsa00240:Pyrimidine metabolism	hsa04720:Long-term potentiation	hsa04650:Natural killer cell mediated cytotoxicity	hsa04920:Adipocytokine signaling pathway				hsa00270:Cysteine and methionine metabolism	hsa04720:Long-term potentiation	hsa00480:Glutathione metabolism	hsa04540:Gap junction	hsa04621:NOD-like receptor signaling pathway		hsa05219:Bladder cancer	hsa04662:B cell receptor signaling pathway	hsa05218:Melanoma
hsa05219:Bladder cancer			hsa04540:Gap junction			hsa00240:Pyrimidine metabolism		hsa05216:Thyroid cancer	hsa04144:Endocytosis	hsa05219:Bladder cancer	hsa05340:Primary immunodeficiency	hsa05014:Amyotrophic lateral sclerosis (ALS)	hsa04960:Aldosterone-regulated sodium reabsorption	hsa00330:Arginine and proline metabolism	hsa05216:Thyroid cancer	hsa00051:Fructose and mannose metabolism	hsa04062:Chemokine signaling pathway	hsa04010:MAPK signaling pathway	hsa04916:Melanogenesis	hsa04010:MAPK signaling pathway	hsa00330:Arginine and proline metabolism				hsa04920:Adipocytokine signaling pathway	hsa00140:Steroid hormone biosynthesis	hsa04010:MAPK signaling pathway	hsa04144:Endocytosis	hsa05219:Bladder cancer		hsa04610:Complement and coagulation cascades	hsa04114:Oocyte meiosis	hsa00240:Pyrimidine metabolism
hsa00920:Sulfur metabolism			hsa00150:Androgen and estrogen metabolism			hsa04920:Adipocytokine signaling pathway		hsa04614:Renin-angiotensin system	hsa04610:Complement and coagulation cascades		hsa04062:Chemokine signaling pathway	hsa04960:Aldosterone-regulated sodium reabsorption	hsa04320:Dorso-ventral axis formation			hsa05214:Glioma	hsa04620:Toll-like receptor signaling pathway	hsa00260:Glycine, serine and threonine metabolism	hsa05211:Renal cell carcinoma	hsa04920:Adipocytokine signaling pathway	hsa00500:Starch and sucrose metabolism				hsa05340:Primary immunodeficiency	hsa04916:Melanogenesis	hsa05222:Small cell lung cancer		hsa04320:Dorso-ventral axis formation		hsa00983:Drug metabolism	hsa04062:Chemokine signaling pathway	hsa04670:Leukocyte transendothelial migration
hsa00051:Fructose and mannose metabolism			hsa04110:Cell cycle			hsa04610:Complement and coagulation cascades		hsa04520:Adherens junction	hsa00330:Arginine and proline metabolism				hsa00350:Tyrosine metabolism			hsa05014:Amyotrophic lateral sclerosis (ALS)		hsa00270:Cysteine and methionine metabolism	hsa05219:Bladder cancer	hsa05222:Small cell lung cancer	hsa00670:One carbon pool by folate				hsa05120:Epithelial cell signaling in Helicobacter pylori infection	hsa00480:Glutathione metabolism	hsa00590:Arachidonic acid metabolism		hsa04540:Gap junction		hsa05221:Acute myeloid leukemia	hsa04930:Type II diabetes mellitus	hsa04620:Toll-like receptor signaling pathway
hsa05222:Small cell lung cancer			hsa04720:Long-term potentiation			hsa04620:Toll-like receptor signaling pathway		hsa04650:Natural killer cell mediated cytotoxicity	hsa05218:Melanoma				hsa04062:Chemokine signaling pathway			hsa05222:Small cell lung cancer		hsa04114:Oocyte meiosis		hsa00052:Galactose metabolism	hsa04614:Renin-angiotensin system				hsa04610:Complement and coagulation cascades	hsa04062:Chemokine signaling pathway	hsa00670:One carbon pool by folate		hsa04920:Adipocytokine signaling pathway		hsa00920:Sulfur metabolism		hsa04960:Aldosterone-regulated sodium reabsorption
hsa03320:PPAR signaling pathway			hsa04115:p53 signaling pathway			hsa00920:Sulfur metabolism		hsa04621:NOD-like receptor signaling pathway					hsa04540:Gap junction			hsa00670:One carbon pool by folate		hsa05014:Amyotrophic lateral sclerosis (ALS)		hsa00620:Pyruvate metabolism	hsa00140:Steroid hormone biosynthesis						hsa00520:Amino sugar and nucleotide sugar metabolism		hsa04720:Long-term potentiation		hsa00270:Cysteine and methionine metabolism		hsa04621:NOD-like receptor signaling pathway
hsa00670:One carbon pool by folate						hsa04010:MAPK signaling pathway		hsa04620:Toll-like receptor signaling pathway					hsa00920:Sulfur metabolism			hsa05220:Chronic myeloid leukemia		hsa00330:Arginine and proline metabolism		hsa04960:Aldosterone-regulated sodium reabsorption	hsa00270:Cysteine and methionine metabolism						hsa04666:Fc gamma R-mediated phagocytosis		hsa00920:Sulfur metabolism		hsa00680:Methane metabolism
hsa04620:Toll-like receptor signaling pathway						hsa04621:NOD-like receptor signaling pathway		hsa04920:Adipocytokine signaling pathway					hsa04930:Type II diabetes mellitus			hsa00140:Steroid hormone biosynthesis		hsa04650:Natural killer cell mediated cytotoxicity		hsa04620:Toll-like receptor signaling pathway	hsa04150:mTOR signaling pathway						hsa04621:NOD-like receptor signaling pathway		hsa05212:Pancreatic cancer		hsa03320:PPAR signaling pathway
hsa00500:Starch and sucrose metabolism						hsa00760:Nicotinate and nicotinamide metabolism		hsa04010:MAPK signaling pathway								hsa04062:Chemokine signaling pathway		hsa00380:Tryptophan metabolism		hsa05340:Primary immunodeficiency	hsa03320:PPAR signaling pathway						hsa04930:Type II diabetes mellitus				hsa04614:Renin-angiotensin system
hsa00983:Drug metabolism						hsa04666:Fc gamma R-mediated phagocytosis		hsa04062:Chemokine signaling pathway								hsa04010:MAPK signaling pathway				hsa05014:Amyotrophic lateral sclerosis (ALS)	hsa04010:MAPK signaling pathway						hsa04920:Adipocytokine signaling pathway				hsa04210:Apoptosis
hsa00310:Lysine degradation						hsa04150:mTOR signaling pathway														hsa04540:Gap junction							hsa04610:Complement and coagulation cascades				hsa00520:Amino sugar and nucleotide sugar metabolism
hsa00350:Tyrosine metabolism						hsa00330:Arginine and proline metabolism																					hsa04150:mTOR signaling pathway				hsa00350:Tyrosine metabolism
hsa05220:Chronic myeloid leukemia						hsa00670:One carbon pool by folate
hsa00260:Glycine, serine and threonine metabolism						hsa04960:Aldosterone-regulated sodium reabsorption
hsa00140:Steroid hormone biosynthesis						hsa04650:Natural killer cell mediated cytotoxicity
						hsa00590:Arachidonic acid metabolism
						hsa00520:Amino sugar and nucleotide sugar metabolism
						hsa00260:Glycine, serine and threonine metabolism
						hsa00010:Glycolysis / Gluconeogenesis
